# Supplementary material for: A multidimensional measure of animal ethics orientation – Developed and applied to a representative sample of the Danish public
Source: PLoS One. 2019 Feb 7;14(2):e0211656. doi: 10.1371/journal.pone.0211656 (PMC6366885; doi:10.1371/journal.pone.0211656)
Supplement: S6 Data — (CSV) [file pone.0211656.s031.csv]

q1	q2	q3	q4	q5	q6	q7	q8	q9	q10	q11	q12	q13	q14	q15	q16	q17	q18	q19	q20	q21	q22	q23	q24	q25	q26	q27	q28	q29	q30	q31	q32	q33	q34	q35	q36	q37	q38	q39	q40	q41	q42	q43	q44
1	71	1,00	1	5,00	5	4	4	3	2	2	1	1	1	3	3	3	16,67	66,67	100,00	50,00	0,00	4,00	2,00	2,00	-0,01	4,00	0,00	0,00	0,00	3,00	4,00	2,00	4,00	0,81	4,00	2,00	3,00	0,27	2,00	3,00	2,00	-0,38	0,41
1	26	3,00	4	3,00	5	2	3	1	1	1	1	1	4	2	3	3	41,67	100,00	75,00	58,33	1,00	2,00	3,00	2,00	-0,24	2,00	0,00	0,00	0,00	4,00	2,00	3,00	4,00	-0,69	2,00	4,00	3,00	-1,25	4,00	4,00	4,00	1,32	1,91
2	58	2,00	1	4,00	3	3	3	4	4	4	2	2	2	4	5	4	50,00	25,00	75,00	16,67	0,00	1,00	1,00	3,00	-1,11	5,00	0,00	0,00	1,00	2,00	3,00	3,00	3,00	-0,64	5,00	2,00	5,00	1,51	2,00	1,00	2,00	-1,04	0,89
2	32	2,00	2	2,00	4	3	3	5	5	5	2	2	2	4	5	5	41,67	0,00	75,00	8,33	0,00	3,00	1,00	2,00	-0,88	4,00	1,00	0,00	0,00	3,00	4,00	3,00	4,00	0,39	4,00	2,00	3,00	0,27	2,00	2,00	2,00	-0,71	0,80
1	70	1,00	3	4,00	5	3	4	2	2	2	1	1	1	2	2	2	25,00	75,00	100,00	75,00	0,00	3,00	3,00	3,00	0,62	3,00	0,00	0,00	0,00	3,00	3,00	3,00	3,00	-0,64	4,00	4,00	4,00	-0,01	3,00	3,00	3,00	0,30	0,31
1	63	1,00	5	5,00	4	3	4	3	4	3	2	2	2	5	5	5	33,33	41,67	75,00	0,00	1,00	3,00	2,00	2,00	-0,38	3,00	0,00	0,00	1,00	3,00	4,00	2,00	3,00	0,32	3,00	3,00	2,00	-0,90	3,00	3,00	2,00	-0,04	0,37
1	56	1,00	1	4,00	3	3	3	3	3	3	3	3	3	3	3	3	50,00	50,00	50,00	50,00	1,00	2,00	2,00	2,00	-0,74	3,00	1,00	0,00	0,00	3,00	3,00	3,00	3,00	-0,64	3,00	3,00	3,00	-0,49	3,00	3,00	3,00	0,30	0,92
2	26	2,00	4	4,00	5	5	5	1	1	5	1	1	1	5	5	5	0,00	66,67	100,00	0,00	1,00	2,00	3,00	3,00	0,26	1,00	0,00	0,00	1,00	5,00	5,00	1,00	5,00	2,26	1,00	5,00	1,00	-2,83	5,00	1,00	1,00	-0,33	0,67
2	23	1,00	1	2,00	5	5	4	3	3	3	2	1	2	2	2	1	8,33	50,00	83,33	83,33	1,00	4,00	4,00	2,00	0,99	2,00	0,00	0,00	0,00	4,00	2,00	1,00	3,00	-0,34	2,00	4,00	3,00	-1,25	3,00	3,00	3,00	0,30	1,05
1	48	3,00	1	5,00	5	3	3	3	3	2	2	2	1	4	4	3	33,33	58,33	83,33	33,33	2,00	2,00	3,00	2,00	-0,24	4,00	0,00	0,00	1,00	4,00	4,00	3,00	3,00	-0,10	4,00	3,00	4,00	0,34	2,00	3,00	3,00	-0,05	0,53
1	25	1,00	3	2,00	3	2	2	2	2	1	2	1	1	3	3	3	66,67	83,33	91,67	50,00	0,00	4,00	2,00	2,00	-0,01	4,00	1,00	0,00	0,00	3,00	4,00	3,00	4,00	0,39	4,00	3,00	4,00	0,34	2,00	3,00	4,00	0,29	0,67
1	38	1,00	2	4,00	3	3	3	3	3	3	3	3	2	4	4	3	50,00	50,00	58,33	33,33	0,00	3,00	2,00	2,00	-0,38	3,00	0,00	0,00	1,00	4,00	3,00	3,00	3,00	-0,64	3,00	3,00	3,00	-0,49	3,00	2,00	2,00	-0,36	0,71
1	45	1,00	3	4,00	3	3	3	3	3	3	3	3	3	3	3	3	50,00	50,00	50,00	50,00	0,00	4,00	4,00	5,00	2,49	4,00	0,00	0,00	1,00	3,00	3,00	3,00	3,00	-0,64	3,00	3,00	3,00	-0,49	4,00	3,00	3,00	0,65	0,40
1	66	2,00	3	3,00	4	3	3	3	2	2	2	2	2	2	2	3	41,67	66,67	75,00	66,67	0,00	2,00	2,00	2,00	-0,74	4,00	0,00	0,00	0,00	3,00	4,00	3,00	4,00	0,39	4,00	3,00	4,00	0,34	3,00	4,00	4,00	0,97	0,96
1	45	1,00	1	4,00	3	2	2	4	3	3	2	3	3	4	3	4	66,67	41,67	58,33	33,33	0,00	2,00	2,00	2,00	-0,74	3,00	0,00	0,00	0,00	3,00	3,00	3,00	3,00	-0,64	5,00	2,00	4,00	1,10	2,00	2,00	2,00	-0,71	0,65
2	33	2,00	1	2,00	3	2	2	3	3	3	2	2	2	5	4	3	66,67	50,00	75,00	25,00	0,00	2,00	2,00	2,00	-0,74	4,00	0,00	0,00	0,00	3,00	4,00	3,00	3,00	-0,10	5,00	1,00	5,00	1,85	2,00	1,00	1,00	-1,38	1,00
2	23	2,00	1	2,00	3	1	1	5	4	3	4	4	4	4	4	4	83,33	25,00	25,00	25,00	0,00	1,00	1,00	1,00	-2,11	.	0,00	0,00	0,00	2,00	4,00	3,00	3,00	-0,10	3,00	2,00	2,00	-0,55	3,00	4,00	2,00	0,29	1,05
2	36	3,00	1	4,00	4	4	4	3	3	2	2	2	2	5	5	5	25,00	58,33	75,00	0,00	3,00	1,00	3,00	2,00	-0,61	3,00	0,00	0,00	0,00	1,00	3,00	4,00	3,00	-1,05	5,00	1,00	5,00	1,85	1,00	1,00	1,00	-1,72	0,85
2	38	3,00	1	4,00	4	4	3	3	2	2	2	2	2	3	2	3	33,33	66,67	75,00	58,33	0,00	3,00	3,00	2,00	0,12	3,00	0,00	0,00	0,00	3,00	3,00	2,00	3,00	-0,22	3,00	2,00	3,00	-0,14	2,00	2,00	3,00	-0,37	0,85
1	33	1,00	1	4,00	5	5	5	5	2	2	1	1	1	1	2	2	0,00	50,00	100,00	83,33	0,00	3,00	3,00	3,00	0,62	1,00	0,00	0,00	0,00	5,00	2,00	4,00	3,00	-1,59	2,00	4,00	2,00	-1,66	3,00	1,00	2,00	-0,69	0,88
2	21	1,00	4	1,00	3	1	3	5	5	5	3	2	2	5	5	5	66,67	0,00	66,67	0,00	1,00	2,00	4,00	3,00	0,76	2,00	0,00	0,00	0,00	2,00	4,00	2,00	4,00	0,81	4,00	2,00	4,00	0,68	2,00	2,00	2,00	-0,71	3,95
1	49	3,00	1	4,00	5	4	5	2	2	2	5	2	1	2	3	2	8,33	75,00	58,33	66,67	0,00	4,00	3,00	3,00	0,99	2,00	0,00	0,00	1,00	2,00	4,00	4,00	3,00	-0,51	4,00	2,00	4,00	0,68	2,00	2,00	2,00	-0,71	0,65
2	58	2,00	2	4,00	3	2	2	5	4	4	4	4	3	4	5	4	66,67	16,67	33,33	16,67	0,00	1,00	2,00	3,00	-0,61	4,00	0,00	0,00	0,00	3,00	4,00	2,00	4,00	0,81	4,00	2,00	5,00	1,09	2,00	2,00	2,00	-0,71	0,71
1	59	2,00	1	5,00	3	4	2	4	4	2	4	3	2	4	3	3	50,00	41,67	50,00	41,67	1,00	3,00	2,00	1,00	-0,88	4,00	0,00	0,00	0,00	2,00	4,00	2,00	4,00	0,81	4,00	2,00	4,00	0,68	2,00	2,00	4,00	-0,03	0,74
1	47	3,00	1	5,00	5	4	5	1	1	1	1	2	1	4	4	2	8,33	100,00	91,67	41,67	0,00	2,00	2,00	1,00	-1,24	5,00	0,00	1,00	0,00	1,00	3,00	3,00	3,00	-0,64	4,00	2,00	4,00	0,68	2,00	2,00	3,00	-0,37	0,53
2	55	1,00	5	3,00	3	1	2	5	5	5	2	2	1	5	5	5	75,00	0,00	83,33	0,00	0,00	2,00	2,00	2,00	-0,74	4,00	0,00	1,00	1,00	3,00	4,00	2,00	4,00	0,81	4,00	2,00	4,00	0,68	1,00	2,00	1,00	-1,40	1,97
1	29	2,00	1	4,00	3	2	2	3	3	3	2	2	2	4	4	5	66,67	50,00	75,00	16,67	0,00	2,00	3,00	3,00	0,26	4,00	0,00	0,00	0,00	3,00	5,00	1,00	4,00	1,77	5,00	1,00	5,00	1,85	2,00	2,00	2,00	-0,71	0,93
2	27	2,00	4	4,00	3	3	3	3	3	3	3	3	3	3	3	3	50,00	50,00	50,00	50,00	1,00	2,00	3,00	4,00	0,76	3,00	0,00	0,00	0,00	2,00	.	.	.	.	.	.	.	.	3,00	3,00	3,00	0,30	0,67
1	46	3,00	1	5,00	5	4	4	3	2	2	2	2	2	4	4	2	16,67	66,67	75,00	41,67	0,00	3,00	2,00	2,00	-0,38	3,00	0,00	1,00	0,00	4,00	3,00	3,00	3,00	-0,64	3,00	3,00	3,00	-0,49	4,00	4,00	4,00	1,32	0,53
1	37	3,00	3	4,00	3	3	3	3	2	2	3	3	3	2	2	3	50,00	66,67	50,00	66,67	2,00	2,00	2,00	2,00	-0,74	3,00	0,00	1,00	0,00	4,00	4,00	4,00	4,00	-0,02	4,00	3,00	4,00	0,34	4,00	3,00	4,00	0,99	0,55
1	59	1,00	2	2,00	3	3	3	5	5	4	3	2	2	4	4	4	50,00	8,33	66,67	25,00	1,00	4,00	3,00	2,00	0,49	3,00	0,00	1,00	0,00	3,00	3,00	3,00	2,00	-1,12	3,00	3,00	4,00	-0,08	2,00	2,00	2,00	-0,71	0,86
2	72	1,00	3	2,00	4	4	4	3	2	2	2	2	2	3	3	3	25,00	66,67	75,00	50,00	0,00	4,00	4,00	2,00	0,99	2,00	0,00	0,00	0,00	4,00	3,00	3,00	3,00	-0,64	3,00	4,00	3,00	-0,84	4,00	4,00	4,00	1,32	0,36
2	29	2,00	3	1,00	4	3	3	5	5	3	3	2	2	3	3	2	41,67	16,67	66,67	58,33	0,00	5,00	2,00	3,00	0,85	3,00	0,00	0,00	0,00	3,00	3,00	3,00	3,00	-0,64	5,00	1,00	5,00	1,85	4,00	4,00	3,00	0,98	3,26
2	25	1,00	1	5,00	4	2	4	4	3	3	2	2	2	5	5	4	41,67	41,67	75,00	8,33	0,00	4,00	1,00	2,00	-0,52	1,00	1,00	0,00	0,00	3,00	3,00	3,00	3,00	-0,64	3,00	4,00	3,00	-0,84	3,00	3,00	4,00	0,64	0,72
2	38	3,00	2	4,00	4	3	3	5	4	4	2	2	1	3	4	4	41,67	16,67	83,33	33,33	2,00	4,00	4,00	2,00	0,99	5,00	0,00	1,00	0,00	1,00	5,00	2,00	5,00	1,84	5,00	1,00	5,00	1,85	1,00	1,00	3,00	-1,05	0,68
1	48	3,00	3	4,00	4	4	4	3	3	3	2	2	2	3	3	3	25,00	50,00	75,00	50,00	0,00	3,00	3,00	2,00	0,12	4,00	0,00	0,00	0,00	3,00	3,00	4,00	3,00	-1,05	4,00	3,00	4,00	0,34	3,00	3,00	3,00	0,30	0,40
1	71	1,00	2	3,00	1	1	1	3	2	3	1	1	1	3	3	3	100,00	58,33	100,00	50,00	1,00	1,00	2,00	2,00	-1,11	3,00	0,00	0,00	0,00	5,00	5,00	2,00	5,00	1,84	5,00	4,00	5,00	0,81	2,00	2,00	2,00	-0,71	1,12
1	24	3,00	3	2,00	3	3	3	3	3	3	3	3	3	3	3	3	50,00	50,00	50,00	50,00	2,00	2,00	1,00	2,00	-1,25	.	0,00	0,00	0,00	3,00	3,00	3,00	3,00	-0,64	3,00	3,00	3,00	-0,49	3,00	3,00	3,00	0,30	0,67
1	43	3,00	3	3,00	3	3	4	5	2	3	2	2	3	5	5	4	41,67	41,67	66,67	8,33	1,00	3,00	3,00	2,00	0,12	4,00	0,00	0,00	0,00	3,00	2,00	5,00	2,00	-2,50	2,00	4,00	2,00	-1,66	2,00	2,00	3,00	-0,37	1,11
2	34	1,00	4	3,00	2	2	2	4	3	3	3	3	3	5	5	4	75,00	41,67	50,00	8,33	1,00	1,00	2,00	1,00	-1,61	3,00	1,00	1,00	0,00	2,00	3,00	3,00	2,00	-1,12	2,00	3,00	3,00	-0,90	2,00	2,00	1,00	-1,05	1,76
1	47	1,00	2	4,00	5	4	4	3	2	4	2	2	3	3	3	3	16,67	50,00	66,67	50,00	2,00	3,00	3,00	3,00	0,62	1,00	1,00	1,00	1,00	3,00	3,00	2,00	4,00	0,27	3,00	2,00	4,00	0,27	3,00	3,00	3,00	0,30	0,52
1	48	2,00	2	1,00	5	5	5	3	1	1	1	1	1	1	1	1	0,00	83,33	100,00	100,00	0,00	3,00	4,00	2,00	0,62	2,00	0,00	0,00	0,00	4,00	3,00	2,00	3,00	-0,22	3,00	2,00	3,00	-0,14	5,00	5,00	5,00	2,33	3,06
1	66	2,00	3	5,00	4	2	3	4	3	2	2	2	3	3	2	2	50,00	50,00	66,67	66,67	1,00	3,00	3,00	2,00	0,12	3,00	0,00	1,00	0,00	4,00	3,00	2,00	4,00	0,27	4,00	4,00	3,00	-0,42	2,00	2,00	2,00	-0,71	0,28
1	24	3,00	3	1,00	3	3	3	3	2	2	3	2	3	4	4	3	50,00	66,67	58,33	33,33	0,00	1,00	2,00	2,00	-1,11	4,00	0,00	0,00	0,00	3,00	3,00	3,00	3,00	-0,64	2,00	2,00	2,00	-0,97	3,00	3,00	3,00	0,30	3,37
2	24	2,00	1	2,00	4	4	4	4	4	2	1	1	2	2	2	2	25,00	41,67	91,67	75,00	0,00	1,00	1,00	3,00	-1,11	3,00	1,00	0,00	0,00	3,00	4,00	3,00	3,00	-0,10	4,00	2,00	3,00	0,27	2,00	2,00	2,00	-0,71	1,05
1	44	3,00	4	3,00	2	2	2	2	2	2	2	2	2	2	2	2	75,00	75,00	75,00	75,00	1,00	4,00	3,00	3,00	0,99	4,00	0,00	1,00	0,00	4,00	4,00	1,00	4,00	1,23	4,00	3,00	4,00	0,34	3,00	4,00	3,00	0,63	1,34
1	29	1,00	1	5,00	3	3	3	3	3	3	2	2	2	3	4	2	50,00	50,00	75,00	50,00	0,00	3,00	2,00	2,00	-0,38	3,00	0,00	1,00	0,00	3,00	2,00	3,00	3,00	-1,18	3,00	3,00	3,00	-0,49	2,00	3,00	4,00	0,29	0,75
2	63	3,00	3	4,00	4	3	3	4	3	3	2	2	2	4	4	2	41,67	41,67	75,00	41,67	1,00	1,00	1,00	1,00	-2,11	3,00	1,00	0,00	0,00	2,00	4,00	3,00	3,00	-0,10	4,00	2,00	2,00	-0,14	2,00	2,00	2,00	-0,71	0,34
2	68	1,00	1	4,00	4	4	4	4	3	2	2	1	1	4	4	3	25,00	50,00	91,67	33,33	2,00	3,00	4,00	2,00	0,62	4,00	0,00	0,00	0,00	4,00	4,00	2,00	4,00	0,81	3,00	4,00	3,00	-0,84	4,00	4,00	3,00	0,98	0,55
2	56	1,00	3	5,00	4	2	2	4	2	2	4	2	2	5	5	5	58,33	58,33	58,33	0,00	0,00	3,00	4,00	2,00	0,62	4,00	0,00	1,00	0,00	2,00	4,00	2,00	4,00	0,81	4,00	2,00	4,00	0,68	2,00	3,00	2,00	-0,38	0,45
2	67	1,00	2	4,00	5	4	4	2	2	2	2	2	2	3	4	4	16,67	75,00	75,00	33,33	1,00	1,00	3,00	2,00	-0,61	4,00	0,00	1,00	0,00	3,00	4,00	2,00	3,00	0,32	4,00	2,00	4,00	0,68	2,00	2,00	2,00	-0,71	0,44
1	65	1,00	2	4,00	4	4	4	2	1	1	2	1	1	4	4	2	25,00	91,67	91,67	41,67	2,00	3,00	3,00	2,00	0,12	2,00	0,00	0,00	0,00	5,00	3,00	3,00	3,00	-0,64	1,00	1,00	1,00	-1,45	5,00	5,00	5,00	2,33	0,45
2	47	1,00	3	3,00	4	3	3	4	3	3	2	2	2	2	2	2	41,67	41,67	75,00	75,00	0,00	1,00	2,00	2,00	-1,11	3,00	0,00	0,00	1,00	3,00	.	.	.	.	.	.	.	.	3,00	3,00	3,00	0,30	1,07
2	59	1,00	3	4,00	3	2	3	5	5	5	2	2	2	5	5	5	58,33	0,00	75,00	0,00	0,00	4,00	3,00	2,00	0,49	5,00	0,00	1,00	0,00	2,00	3,00	3,00	2,00	-1,12	4,00	2,00	4,00	0,68	1,00	1,00	1,00	-1,72	0,55
1	61	2,00	2	5,00	4	4	4	3	2	2	2	2	2	2	3	3	25,00	66,67	75,00	58,33	1,00	2,00	2,00	3,00	-0,25	4,00	0,00	0,00	0,00	1,00	3,00	2,00	4,00	0,27	4,00	2,00	5,00	1,09	2,00	3,00	3,00	-0,05	0,37
2	67	1,00	3	4,00	3	2	3	3	2	2	1	1	1	3	3	4	58,33	66,67	100,00	41,67	1,00	4,00	3,00	2,00	0,49	4,00	0,00	0,00	0,00	3,00	3,00	3,00	3,00	-0,64	4,00	3,00	4,00	0,34	3,00	3,00	2,00	-0,04	0,34
2	45	3,00	4	4,00	4	3	4	5	5	4	2	2	2	4	4	4	33,33	8,33	75,00	25,00	0,00	2,00	3,00	2,00	-0,24	5,00	0,00	0,00	1,00	3,00	4,00	4,00	4,00	-0,02	5,00	1,00	5,00	1,85	1,00	1,00	1,00	-1,72	0,47
1	42	2,00	3	4,00	5	5	5	3	2	2	2	1	1	4	4	3	0,00	66,67	91,67	33,33	0,00	5,00	5,00	4,00	2,86	2,00	0,00	0,00	0,00	3,00	4,00	2,00	4,00	0,81	2,00	4,00	2,00	-1,66	4,00	4,00	4,00	1,32	0,40
2	74	2,00	3	4,00	3	2	1	5	4	4	4	5	2	5	5	5	75,00	16,67	33,33	0,00	0,00	3,00	2,00	2,00	-0,38	5,00	1,00	0,00	1,00	1,00	4,00	3,00	3,00	-0,10	3,00	3,00	3,00	-0,49	1,00	2,00	1,00	-1,40	0,30
1	69	1,00	5	3,00	5	5	5	2	3	3	1	1	1	4	4	2	0,00	58,33	100,00	41,67	1,00	3,00	3,00	2,00	0,12	1,00	0,00	0,00	0,00	5,00	5,00	1,00	5,00	2,26	1,00	1,00	1,00	-1,45	5,00	5,00	4,00	1,99	1,25
1	49	3,00	1	5,00	5	4	4	3	2	2	1	1	1	2	2	2	16,67	66,67	100,00	75,00	0,00	2,00	2,00	2,00	-0,74	4,00	0,00	0,00	1,00	3,00	4,00	3,00	4,00	0,39	3,00	3,00	3,00	-0,49	2,00	2,00	3,00	-0,37	0,53
2	66	2,00	4	5,00	3	3	3	5	3	3	2	2	2	5	5	5	50,00	33,33	75,00	0,00	2,00	1,00	2,00	2,00	-1,11	4,00	0,00	1,00	0,00	2,00	3,00	4,00	3,00	-1,05	4,00	2,00	4,00	0,68	2,00	2,00	1,00	-1,05	0,33
1	42	3,00	4	5,00	5	4	5	4	2	3	1	1	2	4	3	3	8,33	50,00	91,67	41,67	0,00	4,00	2,00	3,00	0,49	2,00	0,00	0,00	0,00	3,00	2,00	2,00	3,00	-0,76	4,00	3,00	3,00	-0,08	3,00	4,00	4,00	0,97	0,39
2	37	3,00	3	4,00	2	2	2	4	2	2	3	3	3	5	4	3	75,00	58,33	50,00	25,00	1,00	2,00	2,00	2,00	-0,74	3,00	0,00	0,00	0,00	3,00	5,00	2,00	5,00	1,84	5,00	2,00	5,00	1,51	3,00	3,00	3,00	0,30	0,53
2	23	1,00	5	2,00	2	2	2	4	5	3	5	4	2	5	4	5	75,00	25,00	33,33	8,33	1,00	2,00	3,00	3,00	0,26	3,00	0,00	0,00	0,00	3,00	3,00	3,00	3,00	-0,64	4,00	2,00	4,00	0,68	3,00	3,00	3,00	0,30	0,84
1	24	2,00	1	2,00	4	3	4	5	2	3	2	2	2	4	4	4	33,33	41,67	75,00	25,00	1,00	1,00	2,00	3,00	-0,61	4,00	0,00	0,00	0,00	2,00	4,00	2,00	5,00	1,30	4,00	2,00	4,00	0,68	1,00	2,00	3,00	-0,72	1,08
2	49	1,00	4	4,00	1	1	1	5	4	5	4	4	4	5	5	5	100,00	8,33	25,00	0,00	1,00	2,00	4,00	1,00	-0,24	5,00	0,00	0,00	1,00	1,00	2,00	4,00	1,00	-2,57	5,00	5,00	5,00	0,47	1,00	1,00	2,00	-1,39	0,47
1	38	1,00	1	4,00	4	1	1	4	4	4	1	1	1	4	4	4	75,00	25,00	100,00	25,00	2,00	4,00	2,00	2,00	-0,01	4,00	0,00	1,00	0,00	3,00	4,00	2,00	4,00	0,81	4,00	1,00	5,00	1,44	4,00	2,00	2,00	-0,02	0,88
2	56	3,00	1	5,00	5	4	4	5	2	3	2	2	2	4	2	2	16,67	41,67	75,00	58,33	1,00	3,00	3,00	3,00	0,62	3,00	0,00	0,00	0,00	3,00	4,00	3,00	2,00	-0,58	4,00	2,00	4,00	0,68	3,00	4,00	3,00	0,63	0,72
1	70	1,00	3	5,00	5	1	5	3	2	2	1	1	1	3	4	3	33,33	66,67	100,00	41,67	0,00	2,00	2,00	2,00	-0,74	3,00	0,00	0,00	0,00	4,00	5,00	1,00	5,00	2,26	1,00	1,00	1,00	-1,45	2,00	5,00	2,00	0,27	0,25
1	74	1,00	1	5,00	4	2	3	5	5	3	4	2	3	1	5	4	50,00	16,67	50,00	41,67	1,00	1,00	1,00	1,00	-2,11	4,00	1,00	0,00	0,00	1,00	1,00	5,00	3,00	-2,55	2,00	5,00	3,00	-1,60	1,00	2,00	2,00	-1,06	0,41
1	31	3,00	3	4,00	4	3	3	5	2	4	4	2	2	4	4	4	41,67	33,33	58,33	25,00	2,00	2,00	2,00	2,00	-0,74	4,00	0,00	0,00	0,00	1,00	3,00	4,00	4,00	-0,56	5,00	1,00	5,00	1,85	2,00	1,00	3,00	-0,70	0,55
2	71	1,00	3	3,00	4	4	4	3	1	1	1	1	1	3	2	3	25,00	83,33	100,00	58,33	0,00	4,00	3,00	2,00	0,49	2,00	0,00	0,00	0,00	4,00	4,00	3,00	4,00	0,39	3,00	3,00	3,00	-0,49	4,00	3,00	3,00	0,65	0,84
1	32	1,00	4	5,00	5	4	4	2	2	2	2	2	2	2	2	2	16,67	75,00	75,00	75,00	0,00	3,00	3,00	3,00	0,62	3,00	0,00	1,00	0,00	4,00	3,00	3,00	3,00	-0,64	3,00	3,00	3,00	-0,49	4,00	3,00	4,00	0,99	0,53
2	55	3,00	2	4,00	4	4	4	3	3	4	2	3	2	4	4	4	25,00	41,67	66,67	25,00	0,00	4,00	4,00	2,00	0,99	3,00	0,00	0,00	0,00	3,00	4,00	3,00	4,00	0,39	4,00	2,00	4,00	0,68	4,00	3,00	4,00	0,99	0,71
2	65	2,00	1	3,00	3	3	3	4	4	4	2	2	2	4	4	4	50,00	25,00	75,00	25,00	0,00	2,00	2,00	2,00	-0,74	3,00	0,00	0,00	0,00	3,00	4,00	2,00	4,00	0,81	4,00	2,00	4,00	0,68	2,00	2,00	2,00	-0,71	1,51
2	59	3,00	3	3,00	4	3	3	4	2	1	1	2	1	2	2	2	41,67	66,67	91,67	75,00	0,00	2,00	2,00	2,00	-0,74	3,00	0,00	0,00	1,00	4,00	3,00	3,00	3,00	-0,64	3,00	3,00	2,00	-0,90	2,00	4,00	2,00	-0,06	1,52
1	30	3,00	4	2,00	2	1	1	5	2	3	2	2	2	5	5	5	91,67	41,67	75,00	0,00	0,00	2,00	3,00	2,00	-0,24	2,00	0,00	1,00	0,00	2,00	5,00	1,00	5,00	2,26	5,00	1,00	5,00	1,85	1,00	1,00	2,00	-1,39	0,77
2	31	1,00	4	3,00	5	2	4	5	3	2	3	2	2	5	5	5	33,33	41,67	66,67	0,00	1,00	1,00	3,00	3,00	-0,11	1,00	0,00	0,00	1,00	3,00	5,00	1,00	4,00	1,77	3,00	1,00	1,00	-0,62	3,00	4,00	3,00	0,63	1,76
1	57	3,00	4	4,00	5	5	5	3	3	3	1	1	2	3	3	2	0,00	50,00	91,67	58,33	0,00	3,00	3,00	3,00	0,62	3,00	0,00	0,00	0,00	2,00	3,00	3,00	3,00	-0,64	3,00	3,00	3,00	-0,49	3,00	3,00	3,00	0,30	0,69
1	57	1,00	5	1,00	5	5	5	3	3	3	5	5	5	3	3	3	0,00	50,00	0,00	50,00	0,00	1,00	1,00	1,00	-2,11	.	0,00	0,00	0,00	3,00	3,00	3,00	3,00	-0,64	3,00	3,00	3,00	-0,49	3,00	3,00	3,00	0,30	4,35
2	64	1,00	5	4,00	4	2	2	2	2	1	2	2	2	2	2	2	58,33	83,33	75,00	75,00	1,00	3,00	1,00	4,00	0,12	5,00	1,00	0,00	0,00	2,00	3,00	4,00	3,00	-1,05	5,00	2,00	4,00	1,10	2,00	2,00	4,00	-0,03	0,44
2	41	1,00	5	4,00	4	4	4	5	4	4	2	1	2	5	5	5	25,00	16,67	83,33	0,00	0,00	2,00	3,00	3,00	0,26	3,00	0,00	1,00	1,00	1,00	3,00	3,00	3,00	-0,64	4,00	2,00	4,00	0,68	1,00	1,00	1,00	-1,72	0,51
1	66	1,00	1	5,00	3	2	1	4	4	5	3	3	2	5	5	3	75,00	16,67	58,33	16,67	2,00	3,00	1,00	1,00	-1,38	5,00	1,00	1,00	0,00	1,00	4,00	4,00	5,00	0,46	3,00	2,00	4,00	0,27	1,00	2,00	1,00	-1,40	0,46
2	50	1,00	3	3,00	3	3	3	4	3	3	3	3	2	4	4	4	50,00	41,67	58,33	25,00	1,00	2,00	2,00	2,00	-0,74	4,00	0,00	0,00	1,00	2,00	4,00	2,00	4,00	0,81	3,00	2,00	3,00	-0,14	3,00	3,00	3,00	0,30	1,52
2	53	1,00	2	4,00	4	3	2	4	4	4	3	2	2	4	4	3	50,00	25,00	66,67	33,33	0,00	2,00	2,00	2,00	-0,74	2,00	0,00	1,00	0,00	2,00	3,00	3,00	3,00	-0,64	4,00	2,00	4,00	0,68	1,00	2,00	1,00	-1,40	0,71
2	32	2,00	4	2,00	3	1	3	2	1	1	2	2	2	4	4	3	66,67	91,67	75,00	33,33	0,00	1,00	1,00	1,00	-2,11	1,00	1,00	0,00	1,00	5,00	4,00	1,00	5,00	1,72	1,00	4,00	2,00	-2,07	5,00	5,00	5,00	2,33	0,75
1	32	1,00	5	3,00	3	3	3	3	3	3	3	3	3	3	3	3	50,00	50,00	50,00	50,00	0,00	4,00	3,00	3,00	0,99	3,00	0,00	0,00	0,00	2,00	.	.	.	.	.	.	.	.	3,00	3,00	3,00	0,30	1,95
2	49	3,00	4	4,00	3	3	4	4	3	3	3	2	2	4	3	4	41,67	41,67	66,67	33,33	0,00	1,00	2,00	2,00	-1,11	4,00	0,00	0,00	1,00	4,00	3,00	3,00	3,00	-0,64	3,00	3,00	3,00	-0,49	2,00	2,00	2,00	-0,71	0,47
1	30	1,00	3	3,00	4	3	3	5	4	4	2	2	2	4	4	4	41,67	16,67	75,00	25,00	1,00	4,00	3,00	3,00	0,99	5,00	0,00	0,00	1,00	2,00	4,00	2,00	4,00	0,81	4,00	2,00	4,00	0,68	1,00	1,00	2,00	-1,39	1,50
1	54	3,00	4	3,00	4	1	1	5	5	5	1	1	1	4	5	5	75,00	0,00	100,00	8,33	2,00	2,00	2,00	2,00	-0,74	5,00	0,00	0,00	1,00	1,00	4,00	2,00	3,00	0,32	5,00	1,00	5,00	1,85	1,00	1,00	1,00	-1,72	1,89
2	26	1,00	3	5,00	5	3	3	3	2	1	1	1	1	4	4	1	33,33	75,00	100,00	50,00	3,00	4,00	3,00	2,00	0,49	4,00	0,00	0,00	0,00	4,00	4,00	1,00	4,00	1,23	3,00	2,00	3,00	-0,14	3,00	3,00	3,00	0,30	0,45
2	44	1,00	4	3,00	3	3	3	4	4	4	2	2	2	5	5	4	50,00	25,00	75,00	8,33	0,00	4,00	3,00	3,00	0,99	3,00	0,00	0,00	1,00	3,00	3,00	3,00	3,00	-0,64	4,00	2,00	4,00	0,68	3,00	2,00	2,00	-0,36	1,30
1	48	3,00	2	5,00	5	5	5	4	1	2	1	1	1	4	4	4	0,00	66,67	100,00	25,00	2,00	3,00	3,00	3,00	0,62	4,00	0,00	0,00	0,00	4,00	4,00	1,00	4,00	1,23	4,00	2,00	4,00	0,68	3,00	4,00	3,00	0,63	0,42
2	45	3,00	3	2,00	4	3	4	2	3	3	2	2	2	3	3	3	33,33	58,33	75,00	50,00	0,00	3,00	4,00	2,00	0,62	3,00	0,00	0,00	0,00	4,00	4,00	3,00	4,00	0,39	3,00	3,00	3,00	-0,49	2,00	3,00	2,00	-0,38	0,46
2	47	3,00	3	4,00	3	3	3	5	5	4	3	3	3	5	5	5	50,00	8,33	50,00	0,00	0,00	3,00	3,00	2,00	0,12	2,00	0,00	1,00	0,00	2,00	4,00	3,00	2,00	-0,58	4,00	2,00	2,00	-0,14	2,00	2,00	1,00	-1,05	0,39
1	63	2,00	5	3,00	4	3	4	3	4	4	2	2	2	4	4	3	33,33	33,33	75,00	33,33	0,00	2,00	3,00	3,00	0,26	3,00	0,00	0,00	0,00	3,00	3,00	3,00	3,00	-0,64	3,00	3,00	3,00	-0,49	3,00	4,00	3,00	0,63	1,25
2	19	3,00	3	2,00	2	2	2	3	2	4	2	2	2	5	3	3	75,00	50,00	75,00	33,33	0,00	3,00	3,00	3,00	0,62	3,00	1,00	0,00	1,00	2,00	4,00	2,00	3,00	0,32	5,00	1,00	3,00	1,03	3,00	3,00	4,00	0,64	0,65
2	33	1,00	2	4,00	3	1	1	5	5	5	3	3	3	5	5	5	83,33	0,00	50,00	0,00	0,00	1,00	1,00	1,00	-2,11	4,00	1,00	0,00	0,00	1,00	2,00	4,00	1,00	-2,57	4,00	3,00	4,00	0,34	1,00	1,00	1,00	-1,72	0,68
1	70	1,00	4	3,00	5	5	5	3	3	1	1	1	1	3	2	2	0,00	66,67	100,00	66,67	1,00	2,00	4,00	1,00	-0,24	2,00	0,00	0,00	0,00	5,00	3,00	3,00	3,00	-0,64	2,00	4,00	1,00	-2,07	5,00	4,00	4,00	1,66	1,05
2	69	1,00	1	5,00	5	4	3	4	4	3	1	1	2	2	2	3	25,00	33,33	91,67	66,67	0,00	2,00	3,00	1,00	-0,74	4,00	0,00	0,00	0,00	4,00	4,00	3,00	3,00	-0,10	4,00	3,00	4,00	0,34	1,00	2,00	2,00	-1,06	0,44
2	22	3,00	4	2,00	2	2	2	2	3	3	1	3	3	2	2	4	75,00	58,33	66,67	58,33	0,00	2,00	3,00	3,00	0,26	3,00	1,00	0,00	0,00	4,00	4,00	2,00	2,00	-0,17	4,00	2,00	4,00	0,68	2,00	2,00	2,00	-0,71	0,79
2	19	3,00	2	2,00	4	3	3	4	3	2	2	2	2	3	3	3	41,67	50,00	75,00	50,00	0,00	4,00	3,00	3,00	0,99	2,00	0,00	0,00	0,00	3,00	4,00	2,00	3,00	0,32	4,00	1,00	4,00	1,03	2,00	2,00	4,00	-0,03	0,84
1	28	3,00	1	5,00	3	2	2	3	2	3	3	2	3	4	4	3	66,67	58,33	58,33	33,33	1,00	1,00	4,00	3,00	0,39	3,00	0,00	0,00	0,00	3,00	3,00	3,00	3,00	-0,64	3,00	3,00	3,00	-0,49	4,00	4,00	3,00	0,98	0,75
1	49	3,00	2	5,00	5	5	4	2	2	2	1	1	1	2	2	2	8,33	75,00	100,00	75,00	0,00	3,00	3,00	3,00	0,62	2,00	0,00	0,00	0,00	3,00	4,00	2,00	4,00	0,81	2,00	4,00	2,00	-1,66	4,00	4,00	3,00	0,98	0,42
2	75	1,00	2	3,00	3	3	3	3	3	3	2	2	2	4	4	4	50,00	50,00	75,00	25,00	0,00	1,00	3,00	2,00	-0,61	4,00	0,00	0,00	0,00	4,00	5,00	2,00	4,00	1,35	5,00	2,00	4,00	1,10	3,00	2,00	3,00	-0,02	1,08
1	62	1,00	2	4,00	3	1	2	3	4	2	1	1	1	3	5	4	75,00	50,00	100,00	25,00	0,00	4,00	3,00	4,00	1,49	4,00	0,00	1,00	1,00	1,00	4,00	3,00	3,00	-0,10	4,00	2,00	4,00	0,68	1,00	4,00	1,00	-0,74	0,45
2	60	3,00	4	2,00	4	4	4	5	2	5	1	1	1	5	5	5	25,00	25,00	100,00	0,00	0,00	2,00	2,00	2,00	-0,74	1,00	0,00	0,00	0,00	3,00	3,00	3,00	3,00	-0,64	4,00	2,00	4,00	0,68	3,00	3,00	3,00	0,30	0,48
2	42	3,00	2	3,00	5	4	4	4	2	1	2	2	2	3	3	2	16,67	66,67	75,00	58,33	2,00	1,00	3,00	2,00	-0,61	3,00	0,00	0,00	1,00	4,00	3,00	3,00	2,00	-1,12	2,00	3,00	3,00	-0,90	3,00	4,00	3,00	0,63	1,39
1	72	1,00	1	5,00	5	5	4	2	2	2	2	1	2	3	3	2	8,33	75,00	83,33	58,33	1,00	4,00	3,00	3,00	0,99	3,00	0,00	0,00	0,00	3,00	3,00	3,00	4,00	-0,15	2,00	3,00	3,00	-0,90	3,00	4,00	3,00	0,63	0,41
1	71	2,00	3	5,00	4	3	3	5	3	2	2	2	4	4	4	4	41,67	41,67	58,33	25,00	1,00	3,00	3,00	2,00	0,12	4,00	0,00	0,00	0,00	3,00	4,00	2,00	3,00	0,32	4,00	2,00	4,00	0,68	2,00	2,00	2,00	-0,71	0,25
2	63	1,00	4	3,00	5	4	4	2	2	3	2	1	1	4	4	4	16,67	66,67	91,67	25,00	1,00	3,00	3,00	3,00	0,62	4,00	0,00	0,00	1,00	4,00	3,00	3,00	3,00	-0,64	3,00	3,00	3,00	-0,49	4,00	4,00	4,00	1,32	1,13
2	43	3,00	4	1,00	3	3	3	3	3	3	3	3	3	3	3	3	50,00	50,00	50,00	50,00	0,00	3,00	2,00	2,00	-0,38	3,00	0,00	0,00	0,00	3,00	3,00	3,00	3,00	-0,64	3,00	3,00	3,00	-0,49	3,00	3,00	3,00	0,30	2,77
1	72	1,00	1	4,00	5	4	5	5	2	2	1	1	1	5	4	2	8,33	50,00	100,00	33,33	0,00	5,00	2,00	2,00	0,35	2,00	0,00	0,00	0,00	5,00	4,00	2,00	4,00	0,81	1,00	5,00	1,00	-2,83	3,00	4,00	2,00	0,29	0,51
1	45	3,00	2	5,00	5	3	3	4	4	3	1	3	3	2	3	3	33,33	33,33	66,67	58,33	0,00	2,00	2,00	2,00	-0,74	4,00	1,00	0,00	0,00	4,00	4,00	2,00	4,00	0,81	4,00	1,00	2,00	0,21	2,00	3,00	2,00	-0,38	0,42
1	42	2,00	1	5,00	4	4	4	4	2	3	2	2	2	4	4	4	25,00	50,00	75,00	25,00	2,00	2,00	3,00	2,00	-0,24	4,00	0,00	0,00	0,00	2,00	4,00	2,00	4,00	0,81	2,00	4,00	2,00	-1,66	2,00	2,00	3,00	-0,37	0,53
1	34	2,00	1	5,00	4	4	3	2	2	1	1	1	1	2	2	2	33,33	83,33	100,00	75,00	0,00	2,00	3,00	3,00	0,26	2,00	0,00	0,00	0,00	5,00	3,00	2,00	4,00	0,27	3,00	2,00	3,00	-0,14	3,00	4,00	4,00	0,97	0,71
2	54	1,00	3	3,00	4	2	2	4	4	2	3	2	2	5	5	4	58,33	41,67	66,67	8,33	1,00	4,00	2,00	3,00	0,49	4,00	0,00	0,00	0,00	2,00	3,00	2,00	2,00	-0,71	4,00	2,00	4,00	0,68	2,00	2,00	2,00	-0,71	1,52
2	69	1,00	3	4,00	3	1	1	5	5	4	4	5	2	4	5	5	83,33	8,33	33,33	8,33	2,00	1,00	1,00	2,00	-1,61	5,00	1,00	0,00	0,00	1,00	5,00	1,00	5,00	2,26	5,00	1,00	5,00	1,85	1,00	1,00	1,00	-1,72	0,34
1	48	2,00	1	5,00	5	4	4	4	2	2	1	1	1	2	2	2	16,67	58,33	100,00	75,00	0,00	1,00	1,00	1,00	-2,11	1,00	0,00	0,00	0,00	3,00	3,00	3,00	3,00	-0,64	3,00	3,00	3,00	-0,49	2,00	3,00	4,00	0,29	0,53
2	54	1,00	1	3,00	4	3	4	5	2	2	1	1	1	3	3	3	33,33	50,00	100,00	50,00	0,00	3,00	4,00	2,00	0,62	1,00	0,00	1,00	1,00	3,00	3,00	2,00	4,00	0,27	3,00	3,00	4,00	-0,08	4,00	4,00	4,00	1,32	2,45
2	60	1,00	4	2,00	5	5	5	5	3	3	2	2	2	5	5	5	0,00	33,33	75,00	0,00	1,00	4,00	3,00	2,00	0,49	3,00	0,00	0,00	0,00	3,00	5,00	1,00	4,00	1,77	3,00	2,00	4,00	0,27	2,00	2,00	2,00	-0,71	0,48
2	50	1,00	4	4,00	4	3	4	4	3	3	3	3	2	3	3	3	33,33	41,67	58,33	50,00	1,00	1,00	2,00	3,00	-0,61	4,00	0,00	0,00	0,00	3,00	2,00	3,00	3,00	-1,18	4,00	4,00	4,00	-0,01	2,00	2,00	2,00	-0,71	0,67
1	65	2,00	2	3,00	4	3	3	4	4	4	2	2	2	4	4	4	41,67	25,00	75,00	25,00	0,00	2,00	3,00	3,00	0,26	4,00	0,00	0,00	0,00	2,00	4,00	2,00	3,00	0,32	4,00	2,00	4,00	0,68	2,00	3,00	2,00	-0,38	1,25
2	55	3,00	1	3,00	4	4	4	4	3	2	2	2	2	3	3	2	25,00	50,00	75,00	58,33	1,00	2,00	3,00	3,00	0,26	2,00	0,00	1,00	0,00	3,00	3,00	3,00	3,00	-0,64	3,00	3,00	3,00	-0,49	2,00	4,00	2,00	-0,06	2,45
1	39	3,00	1	5,00	5	5	5	3	1	1	2	2	1	3	3	3	0,00	83,33	83,33	50,00	1,00	3,00	2,00	2,00	-0,38	3,00	0,00	0,00	0,00	4,00	3,00	3,00	3,00	-0,64	3,00	3,00	3,00	-0,49	3,00	5,00	4,00	1,29	0,71
1	23	3,00	4	2,00	4	3	4	5	5	4	4	2	2	5	5	4	33,33	8,33	58,33	8,33	0,00	3,00	3,00	1,00	-0,38	4,00	1,00	1,00	0,00	4,00	5,00	1,00	2,00	0,79	4,00	1,00	4,00	1,03	2,00	4,00	1,00	-0,40	0,81
2	59	1,00	2	3,00	3	1	1	4	4	2	2	1	1	4	3	2	83,33	41,67	91,67	50,00	1,00	3,00	3,00	3,00	0,62	3,00	0,00	0,00	1,00	2,00	4,00	3,00	3,00	-0,10	.	.	.	.	3,00	2,00	2,00	-0,36	1,96
1	46	3,00	3	1,00	4	3	3	2	2	2	2	2	2	4	4	3	41,67	75,00	75,00	33,33	1,00	2,00	3,00	2,00	-0,24	3,00	0,00	0,00	0,00	4,00	3,00	3,00	3,00	-0,64	3,00	3,00	3,00	-0,49	4,00	4,00	3,00	0,98	2,37
1	40	3,00	2	3,00	1	2	4	2	5	2	3	4	3	3	3	4	66,67	50,00	41,67	41,67	1,00	5,00	5,00	4,00	2,86	.	0,00	0,00	0,00	5,00	4,00	5,00	3,00	-0,93	4,00	5,00	3,00	-0,77	4,00	2,00	3,00	0,32	1,43
1	32	3,00	2	4,00	2	2	3	5	4	3	4	3	3	5	5	4	66,67	25,00	41,67	8,33	1,00	3,00	3,00	3,00	0,62	4,00	0,00	1,00	0,00	2,00	4,00	4,00	4,00	-0,02	4,00	2,00	4,00	0,68	1,00	2,00	1,00	-1,40	0,71
1	69	3,00	1	1,00	4	3	2	4	3	3	4	4	4	5	5	5	50,00	41,67	25,00	0,00	0,00	1,00	2,00	1,00	-1,61	4,00	0,00	0,00	0,00	4,00	3,00	3,00	3,00	-0,64	3,00	4,00	3,00	-0,84	4,00	3,00	2,00	0,31	3,32
2	22	1,00	1	4,00	4	3	3	4	3	3	2	1	3	3	2	3	41,67	41,67	75,00	58,33	1,00	1,00	1,00	1,00	-2,11	4,00	1,00	0,00	0,00	2,00	4,00	2,00	4,00	0,81	2,00	4,00	4,00	-0,84	1,00	2,00	2,00	-1,06	0,90
2	45	3,00	1	3,00	2	3	3	5	4	3	2	3	3	5	5	3	58,33	25,00	58,33	16,67	0,00	2,00	3,00	3,00	0,26	2,00	0,00	0,00	0,00	3,00	3,00	3,00	3,00	-0,64	3,00	4,00	4,00	-0,42	2,00	2,00	2,00	-0,71	1,73
1	51	3,00	1	3,00	5	4	4	5	5	5	3	2	2	5	5	5	16,67	0,00	66,67	0,00	1,00	3,00	3,00	2,00	0,12	4,00	0,00	0,00	1,00	5,00	5,00	3,00	2,00	-0,04	5,00	1,00	5,00	1,85	1,00	1,00	1,00	-1,72	2,53
1	65	1,00	2	3,00	3	3	3	3	3	3	2	2	2	2	3	3	50,00	50,00	75,00	58,33	1,00	4,00	5,00	2,00	1,49	3,00	0,00	0,00	1,00	4,00	4,00	3,00	3,00	-0,10	4,00	3,00	3,00	-0,08	3,00	3,00	2,00	-0,04	1,25
1	63	3,00	4	3,00	4	3	3	4	3	2	2	2	2	4	4	4	41,67	50,00	75,00	25,00	0,00	3,00	3,00	2,00	0,12	4,00	0,00	0,00	0,00	4,00	3,00	2,00	4,00	0,27	3,00	2,00	4,00	0,27	3,00	3,00	2,00	-0,04	1,17
1	63	1,00	3	1,00	4	3	2	4	2	2	2	2	2	4	3	4	50,00	58,33	75,00	33,33	0,00	3,00	2,00	2,00	-0,38	4,00	0,00	0,00	0,00	2,00	4,00	2,00	4,00	0,81	4,00	2,00	4,00	0,68	2,00	2,00	3,00	-0,37	2,06
2	48	1,00	1	4,00	5	3	3	1	1	1	2	2	2	1	2	2	33,33	100,00	75,00	83,33	0,00	2,00	2,00	3,00	-0,25	1,00	0,00	0,00	0,00	5,00	3,00	3,00	3,00	-0,64	3,00	3,00	3,00	-0,49	5,00	5,00	5,00	2,33	0,63
1	49	2,00	2	4,00	4	1	2	4	3	3	4	3	4	4	4	4	66,67	41,67	33,33	25,00	0,00	3,00	3,00	2,00	0,12	3,00	0,00	1,00	0,00	1,00	3,00	3,00	2,00	-1,12	2,00	2,00	3,00	-0,56	3,00	1,00	1,00	-1,03	0,52
1	42	3,00	1	5,00	3	3	4	3	3	3	2	2	2	4	4	4	41,67	50,00	75,00	25,00	0,00	4,00	3,00	3,00	0,99	3,00	0,00	0,00	0,00	3,00	4,00	3,00	4,00	0,39	4,00	1,00	4,00	1,03	3,00	4,00	4,00	0,97	0,53
2	56	1,00	1	4,00	4	3	3	4	4	4	2	2	2	5	5	5	41,67	25,00	75,00	0,00	0,00	4,00	4,00	2,00	0,99	3,00	0,00	0,00	0,00	3,00	3,00	3,00	3,00	-0,64	3,00	3,00	3,00	-0,49	1,00	1,00	2,00	-1,39	0,89
2	52	1,00	2	2,00	5	3	3	4	4	3	1	1	1	3	3	2	33,33	33,33	100,00	58,33	1,00	1,00	3,00	2,00	-0,61	4,00	0,00	1,00	0,00	3,00	4,00	2,00	4,00	0,81	2,00	4,00	2,00	-1,66	2,00	3,00	2,00	-0,38	0,83
1	44	3,00	1	2,00	3	3	3	3	3	3	3	3	3	3	3	3	50,00	50,00	50,00	50,00	0,00	4,00	3,00	3,00	0,99	3,00	0,00	0,00	0,00	3,00	3,00	3,00	3,00	-0,64	3,00	3,00	3,00	-0,49	3,00	3,00	3,00	0,30	0,76
2	69	2,00	1	5,00	4	4	4	4	2	4	2	2	2	5	4	4	25,00	41,67	75,00	16,67	2,00	3,00	3,00	3,00	0,62	4,00	0,00	0,00	0,00	2,00	4,00	2,00	4,00	0,81	4,00	2,00	4,00	0,68	3,00	3,00	2,00	-0,04	0,44
1	66	1,00	1	4,00	5	5	4	3	2	2	1	1	1	2	2	2	8,33	66,67	100,00	75,00	0,00	4,00	3,00	2,00	0,49	2,00	0,00	0,00	0,00	3,00	3,00	2,00	4,00	0,27	2,00	2,00	2,00	-0,97	2,00	4,00	3,00	0,28	0,57
1	24	2,00	5	4,00	3	2	2	4	3	3	1	1	1	4	4	4	66,67	41,67	100,00	25,00	1,00	1,00	3,00	5,00	0,89	2,00	0,00	0,00	0,00	2,00	4,00	2,00	3,00	0,32	3,00	3,00	3,00	-0,49	2,00	3,00	3,00	-0,05	0,75
2	40	3,00	3	4,00	1	1	2	5	5	5	4	4	4	5	5	5	91,67	0,00	25,00	0,00	0,00	3,00	3,00	2,00	0,12	3,00	0,00	1,00	0,00	2,00	4,00	2,00	4,00	0,81	4,00	2,00	4,00	0,68	1,00	2,00	1,00	-1,40	0,39
2	20	1,00	5	3,00	3	3	4	3	3	3	2	2	3	5	3	3	41,67	50,00	66,67	33,33	1,00	4,00	3,00	2,00	0,49	1,00	0,00	0,00	0,00	5,00	4,00	1,00	5,00	1,72	1,00	4,00	1,00	-2,49	4,00	5,00	3,00	1,30	1,99
2	56	1,00	5	2,00	4	3	3	3	2	2	2	2	2	3	3	3	41,67	66,67	75,00	50,00	0,00	4,00	2,00	2,00	-0,01	3,00	0,00	0,00	0,00	4,00	4,00	3,00	2,00	-0,58	3,00	3,00	2,00	-0,90	3,00	2,00	3,00	-0,02	0,84
1	47	3,00	4	3,00	3	3	2	3	5	3	1	1	2	3	3	4	58,33	33,33	91,67	41,67	0,00	2,00	2,00	2,00	-0,74	3,00	0,00	0,00	0,00	2,00	4,00	2,00	3,00	0,32	5,00	1,00	5,00	1,85	2,00	2,00	2,00	-0,71	1,34
1	63	1,00	3	1,00	3	4	3	3	4	4	2	2	2	4	4	3	41,67	33,33	75,00	33,33	2,00	3,00	4,00	2,00	0,62	3,00	0,00	0,00	0,00	3,00	4,00	2,00	4,00	0,81	5,00	2,00	4,00	1,10	2,00	2,00	2,00	-0,71	2,06
2	49	3,00	1	4,00	5	5	5	3	1	1	1	1	1	2	2	2	0,00	83,33	100,00	75,00	1,00	2,00	3,00	2,00	-0,24	1,00	0,00	0,00	1,00	5,00	3,00	3,00	3,00	-0,64	2,00	4,00	4,00	-0,84	4,00	4,00	2,00	0,64	0,63
2	66	1,00	5	3,00	3	3	3	4	3	3	3	3	3	5	4	4	50,00	41,67	50,00	16,67	2,00	2,00	3,00	3,00	0,26	5,00	0,00	0,00	0,00	4,00	3,00	3,00	3,00	-0,64	4,00	4,00	4,00	-0,01	2,00	3,00	2,00	-0,38	1,21
2	72	2,00	3	2,00	1	1	1	5	5	5	5	5	5	5	5	5	100,00	0,00	0,00	0,00	1,00	2,00	3,00	3,00	0,26	3,00	0,00	1,00	0,00	1,00	2,00	2,00	2,00	-1,25	3,00	3,00	2,00	-0,90	2,00	2,00	2,00	-0,71	0,36
1	28	2,00	1	4,00	5	4	4	2	3	1	1	1	1	2	2	2	16,67	75,00	100,00	75,00	1,00	4,00	3,00	3,00	0,99	4,00	0,00	0,00	0,00	4,00	4,00	2,00	4,00	0,81	2,00	2,00	2,00	-0,97	4,00	2,00	4,00	0,66	0,93
2	43	2,00	5	2,00	3	2	2	5	3	3	3	3	3	4	5	5	66,67	33,33	50,00	8,33	1,00	2,00	3,00	3,00	0,26	2,00	0,00	0,00	0,00	3,00	3,00	2,00	4,00	0,27	3,00	2,00	4,00	0,27	2,00	2,00	3,00	-0,37	0,59
1	69	1,00	4	4,00	5	4	4	5	3	3	2	2	2	5	5	5	16,67	33,33	75,00	0,00	0,00	2,00	3,00	1,00	-0,74	2,00	0,00	0,00	1,00	4,00	4,00	2,00	3,00	0,32	3,00	2,00	4,00	0,27	3,00	3,00	2,00	-0,04	0,42
2	51	3,00	3	3,00	2	1	2	5	3	3	4	1	1	5	5	5	83,33	33,33	75,00	0,00	0,00	1,00	2,00	3,00	-0,61	5,00	0,00	0,00	0,00	2,00	5,00	1,00	5,00	2,26	5,00	1,00	5,00	1,85	1,00	1,00	1,00	-1,72	1,52
1	56	3,00	3	1,00	3	3	3	4	4	3	2	2	2	4	5	4	50,00	33,33	75,00	16,67	1,00	2,00	3,00	2,00	-0,24	3,00	0,00	0,00	1,00	3,00	4,00	2,00	3,00	0,32	4,00	2,00	3,00	0,27	2,00	2,00	3,00	-0,37	3,34
1	69	2,00	3	5,00	5	4	4	5	2	3	2	2	2	3	3	4	16,67	41,67	75,00	41,67	1,00	2,00	1,00	2,00	-1,25	4,00	1,00	0,00	0,00	4,00	3,00	2,00	2,00	-0,71	3,00	4,00	2,00	-1,25	2,00	3,00	4,00	0,29	0,28
2	65	3,00	2	3,00	3	3	3	3	3	3	3	3	3	3	3	3	50,00	50,00	50,00	50,00	0,00	2,00	2,00	2,00	-0,74	3,00	0,00	0,00	0,00	3,00	3,00	3,00	3,00	-0,64	3,00	3,00	3,00	-0,49	3,00	3,00	3,00	0,30	1,21
1	25	1,00	1	2,00	4	4	4	3	2	1	2	2	1	3	3	2	25,00	75,00	83,33	58,33	1,00	3,00	3,00	3,00	0,62	3,00	0,00	0,00	0,00	4,00	4,00	2,00	4,00	0,81	2,00	2,00	2,00	-0,97	3,00	3,00	3,00	0,30	1,08
2	44	2,00	4	5,00	5	4	4	5	4	3	2	2	1	3	3	3	16,67	25,00	83,33	50,00	1,00	2,00	2,00	2,00	-0,74	3,00	0,00	0,00	0,00	1,00	2,00	2,00	2,00	-1,25	5,00	1,00	5,00	1,85	1,00	1,00	3,00	-1,05	0,38
2	64	1,00	1	4,00	5	3	5	5	3	3	1	1	3	3	5	5	16,67	33,33	83,33	16,67	0,00	2,00	2,00	4,00	0,25	4,00	0,00	0,00	0,00	5,00	4,00	4,00	4,00	-0,02	4,00	3,00	4,00	0,34	3,00	3,00	3,00	0,30	0,55
2	35	2,00	1	4,00	4	3	3	5	4	3	2	2	2	4	4	2	41,67	25,00	75,00	41,67	0,00	1,00	1,00	1,00	-2,11	4,00	1,00	0,00	1,00	1,00	2,00	4,00	2,00	-2,08	5,00	1,00	4,00	1,44	1,00	1,00	2,00	-1,39	0,85
2	70	2,00	2	4,00	4	4	4	2	1	1	1	1	1	2	3	3	25,00	91,67	100,00	58,33	0,00	3,00	3,00	4,00	1,12	4,00	0,00	0,00	0,00	4,00	3,00	3,00	4,00	-0,15	3,00	3,00	3,00	-0,49	3,00	3,00	3,00	0,30	0,39
2	24	1,00	2	4,00	3	2	2	2	3	2	2	2	2	5	5	5	66,67	66,67	75,00	0,00	0,00	4,00	2,00	2,00	-0,01	3,00	0,00	0,00	0,00	2,00	4,00	2,00	3,00	0,32	4,00	2,00	4,00	0,68	3,00	2,00	3,00	-0,02	0,72
1	69	1,00	2	5,00	4	2	5	2	2	2	4	2	2	2	2	2	33,33	75,00	58,33	75,00	0,00	1,00	2,00	2,00	-1,11	1,00	0,00	0,00	0,00	4,00	4,00	1,00	4,00	1,23	2,00	3,00	2,00	-1,31	4,00	4,00	4,00	1,32	0,37
1	73	1,00	1	1,00	3	3	3	3	3	3	3	3	3	3	3	3	50,00	50,00	50,00	50,00	0,00	2,00	1,00	1,00	-1,75	3,00	0,00	0,00	0,00	3,00	3,00	3,00	3,00	-0,64	3,00	3,00	3,00	-0,49	3,00	3,00	3,00	0,30	2,98
1	29	1,00	1	2,00	5	4	5	4	2	2	1	1	1	2	2	2	8,33	58,33	100,00	75,00	1,00	2,00	3,00	3,00	0,26	2,00	0,00	0,00	0,00	3,00	4,00	2,00	4,00	0,81	4,00	3,00	4,00	0,34	4,00	4,00	4,00	1,32	1,08
1	41	2,00	1	3,00	5	5	5	5	5	5	3	1	1	5	5	5	0,00	0,00	83,33	0,00	0,00	3,00	3,00	3,00	0,62	3,00	0,00	1,00	0,00	3,00	4,00	2,00	4,00	0,81	4,00	2,00	5,00	1,09	1,00	4,00	1,00	-0,74	1,79
1	71	1,00	3	5,00	3	3	4	4	3	2	3	3	3	4	4	4	41,67	50,00	50,00	25,00	0,00	3,00	3,00	2,00	0,12	3,00	0,00	0,00	0,00	2,00	4,00	3,00	3,00	-0,10	3,00	4,00	3,00	-0,84	2,00	3,00	2,00	-0,38	0,25
2	25	1,00	4	3,00	4	3	3	5	4	4	2	2	1	4	2	4	41,67	16,67	83,33	41,67	0,00	5,00	3,00	2,00	0,85	4,00	0,00	1,00	0,00	3,00	4,00	4,00	4,00	-0,02	5,00	2,00	4,00	1,10	2,00	2,00	2,00	-0,71	1,85
1	30	3,00	4	4,00	5	4	3	3	1	1	1	1	1	2	2	2	25,00	83,33	100,00	75,00	0,00	4,00	3,00	2,00	0,49	1,00	0,00	0,00	1,00	5,00	3,00	3,00	3,00	-0,64	3,00	3,00	4,00	-0,08	5,00	5,00	4,00	1,99	0,66
2	21	3,00	4	2,00	3	3	3	5	4	3	2	3	2	5	5	4	50,00	25,00	66,67	8,33	1,00	2,00	3,00	3,00	0,26	3,00	1,00	1,00	0,00	3,00	3,00	2,00	3,00	-0,22	3,00	1,00	4,00	0,62	3,00	2,00	4,00	0,31	0,79
1	62	1,00	2	4,00	5	5	5	4	2	1	3	1	1	4	4	3	0,00	66,67	83,33	33,33	1,00	4,00	2,00	2,00	-0,01	3,00	0,00	1,00	0,00	3,00	3,00	3,00	3,00	-0,64	4,00	3,00	4,00	0,34	2,00	5,00	4,00	0,95	0,45
1	47	2,00	2	4,00	5	5	5	1	1	1	1	1	1	1	1	1	0,00	100,00	100,00	100,00	0,00	5,00	3,00	2,00	0,85	1,00	0,00	0,00	0,00	5,00	3,00	1,00	4,00	0,69	2,00	4,00	1,00	-2,07	5,00	5,00	5,00	2,33	0,52
2	46	3,00	5	3,00	4	1	1	4	4	4	1	1	1	4	4	4	75,00	25,00	100,00	25,00	0,00	3,00	2,00	4,00	0,62	4,00	0,00	0,00	0,00	3,00	4,00	2,00	4,00	0,81	4,00	2,00	4,00	0,68	3,00	3,00	3,00	0,30	1,40
1	32	3,00	5	3,00	5	5	5	2	2	1	1	1	1	1	1	2	0,00	83,33	100,00	91,67	3,00	4,00	5,00	3,00	1,99	2,00	0,00	1,00	0,00	5,00	5,00	1,00	5,00	2,26	1,00	5,00	1,00	-2,83	5,00	5,00	4,00	1,99	1,95
2	30	2,00	2	4,00	3	1	1	5	4	4	4	3	2	5	5	5	83,33	16,67	50,00	0,00	1,00	2,00	2,00	2,00	-0,74	5,00	0,00	0,00	0,00	1,00	4,00	2,00	2,00	-0,17	5,00	1,00	4,00	1,44	1,00	1,00	2,00	-1,39	0,68
2	41	3,00	4	4,00	2	2	1	5	4	2	4	2	3	4	4	4	83,33	33,33	50,00	25,00	0,00	3,00	3,00	2,00	0,12	4,00	0,00	1,00	0,00	2,00	3,00	3,00	3,00	-0,64	4,00	2,00	4,00	0,68	1,00	1,00	2,00	-1,39	0,47
1	28	2,00	3	4,00	2	2	2	2	2	2	2	2	2	2	2	2	75,00	75,00	75,00	75,00	0,00	1,00	1,00	1,00	-2,11	.	0,00	0,00	0,00	2,00	.	.	.	.	5,00	5,00	5,00	0,47	2,00	2,00	2,00	-0,71	0,57
2	58	1,00	2	4,00	5	5	5	5	4	4	1	1	1	5	4	2	0,00	16,67	100,00	33,33	1,00	2,00	3,00	2,00	-0,24	4,00	0,00	0,00	0,00	1,00	1,00	5,00	1,00	-3,53	5,00	1,00	5,00	1,85	2,00	2,00	1,00	-1,05	0,71
1	45	3,00	3	4,00	5	5	1	2	2	2	1	1	1	3	3	2	33,33	75,00	100,00	58,33	2,00	2,00	3,00	2,00	-0,24	3,00	1,00	0,00	0,00	4,00	4,00	2,00	4,00	0,81	3,00	2,00	3,00	-0,14	3,00	4,00	4,00	0,97	0,40
2	33	1,00	4	4,00	2	4	3	4	2	2	4	3	2	3	3	2	50,00	58,33	50,00	58,33	0,00	1,00	2,00	2,00	-1,11	2,00	0,00	0,00	1,00	3,00	3,00	3,00	2,00	-1,12	3,00	4,00	3,00	-0,84	3,00	3,00	3,00	0,30	0,64
2	20	1,00	3	4,00	3	3	3	4	4	4	1	1	1	4	4	4	50,00	25,00	100,00	25,00	2,00	4,00	3,00	3,00	0,99	2,00	0,00	0,00	0,00	2,00	4,00	3,00	4,00	0,39	4,00	2,00	4,00	0,68	2,00	2,00	1,00	-1,05	0,56
1	18	3,00	3	1,00	2	3	3	3	3	3	3	3	3	3	3	3	58,33	50,00	50,00	50,00	1,00	4,00	3,00	2,00	0,49	3,00	0,00	1,00	0,00	3,00	3,00	3,00	3,00	-0,64	3,00	3,00	3,00	-0,49	3,00	3,00	3,00	0,30	3,37
1	28	1,00	2	4,00	1	2	1	1	2	2	1	2	1	2	1	1	91,67	83,33	91,67	91,67	0,00	5,00	5,00	5,00	3,36	.	0,00	0,00	0,00	4,00	5,00	5,00	5,00	0,59	5,00	5,00	5,00	0,47	5,00	5,00	5,00	2,33	0,74
1	67	1,00	3	3,00	4	2	2	4	3	3	2	2	2	3	3	4	58,33	41,67	75,00	41,67	1,00	2,00	2,00	2,00	-0,74	3,00	0,00	1,00	0,00	3,00	4,00	2,00	3,00	0,32	4,00	2,00	3,00	0,27	2,00	3,00	3,00	-0,05	0,96
2	56	3,00	5	2,00	5	4	4	4	3	3	2	2	2	3	4	3	16,67	41,67	75,00	41,67	0,00	3,00	3,00	3,00	0,62	3,00	0,00	0,00	1,00	2,00	4,00	2,00	4,00	0,81	4,00	3,00	3,00	-0,08	2,00	3,00	3,00	-0,05	0,84
1	46	3,00	5	3,00	4	4	4	3	2	3	1	1	1	2	2	2	25,00	58,33	100,00	75,00	0,00	5,00	2,00	2,00	0,35	3,00	0,00	0,00	0,00	4,00	3,00	3,00	3,00	-0,64	3,00	3,00	3,00	-0,49	2,00	2,00	1,00	-1,05	1,44
2	27	1,00	4	5,00	3	2	2	2	3	3	2	2	3	3	3	3	66,67	58,33	66,67	50,00	0,00	3,00	1,00	3,00	-0,38	4,00	0,00	0,00	0,00	4,00	4,00	4,00	4,00	-0,02	4,00	4,00	4,00	-0,01	5,00	4,00	3,00	1,32	0,54
1	43	3,00	4	3,00	5	5	5	1	2	2	1	1	1	3	3	3	0,00	83,33	100,00	50,00	0,00	5,00	4,00	2,00	1,36	3,00	0,00	1,00	1,00	4,00	4,00	3,00	4,00	0,39	4,00	3,00	3,00	-0,08	3,00	4,00	3,00	0,63	1,34
1	49	1,00	1	3,00	2	1	1	4	3	3	2	2	2	4	4	3	91,67	41,67	75,00	33,33	0,00	1,00	2,00	2,00	-1,11	4,00	0,00	0,00	0,00	4,00	3,00	3,00	4,00	-0,15	4,00	3,00	3,00	-0,08	2,00	2,00	2,00	-0,71	1,79
1	33	3,00	4	3,00	5	4	5	2	2	1	1	2	1	1	2	3	8,33	83,33	91,67	75,00	1,00	4,00	3,00	2,00	0,49	3,00	0,00	0,00	0,00	2,00	2,00	4,00	2,00	-2,08	5,00	1,00	5,00	1,85	2,00	2,00	4,00	-0,03	1,82
1	69	1,00	2	4,00	4	2	1	5	5	5	2	2	2	5	5	5	66,67	0,00	75,00	0,00	1,00	1,00	1,00	1,00	-2,11	.	0,00	0,00	0,00	1,00	1,00	5,00	1,00	-3,53	5,00	1,00	5,00	1,85	1,00	1,00	1,00	-1,72	0,45
2	66	3,00	4	4,00	3	3	3	4	2	2	2	2	2	4	4	3	50,00	58,33	75,00	33,33	0,00	4,00	2,00	1,00	-0,51	4,00	0,00	1,00	0,00	3,00	4,00	2,00	4,00	0,81	4,00	2,00	4,00	0,68	2,00	2,00	2,00	-0,71	0,41
2	56	3,00	4	4,00	3	4	4	4	2	2	2	2	2	4	4	3	33,33	58,33	75,00	33,33	1,00	3,00	2,00	3,00	0,12	3,00	0,00	0,00	0,00	2,00	4,00	4,00	4,00	-0,02	4,00	4,00	4,00	-0,01	2,00	2,00	3,00	-0,37	0,67
1	25	2,00	4	4,00	5	5	5	2	1	2	1	1	2	1	1	1	0,00	83,33	91,67	100,00	0,00	4,00	3,00	3,00	0,99	1,00	0,00	0,00	0,00	5,00	4,00	2,00	5,00	1,30	3,00	3,00	2,00	-0,90	5,00	5,00	5,00	2,33	0,69
2	67	2,00	1	5,00	5	3	4	3	3	2	2	2	2	3	2	4	25,00	58,33	75,00	50,00	0,00	3,00	1,00	4,00	0,12	3,00	0,00	0,00	0,00	4,00	4,00	3,00	4,00	0,39	3,00	3,00	3,00	-0,49	3,00	4,00	3,00	0,63	0,44
1	32	2,00	4	2,00	5	4	5	2	1	1	1	1	2	2	3	2	8,33	91,67	91,67	66,67	0,00	1,00	2,00	2,00	-1,11	2,00	1,00	0,00	0,00	3,00	3,00	3,00	4,00	-0,15	3,00	3,00	4,00	-0,08	2,00	2,00	3,00	-0,37	0,77
1	35	3,00	4	3,00	3	3	2	3	3	2	2	2	2	3	3	3	58,33	58,33	75,00	50,00	0,00	4,00	2,00	2,00	-0,01	4,00	0,00	0,00	1,00	2,00	3,00	2,00	3,00	-0,22	4,00	2,00	4,00	0,68	2,00	3,00	3,00	-0,05	1,82
2	68	1,00	4	3,00	4	4	4	3	2	2	2	2	2	5	5	5	25,00	66,67	75,00	0,00	0,00	4,00	3,00	2,00	0,49	3,00	0,00	0,00	0,00	4,00	4,00	2,00	4,00	0,81	4,00	3,00	4,00	0,34	3,00	3,00	3,00	0,30	1,13
2	33	3,00	1	2,00	4	4	4	5	3	3	2	1	1	4	3	4	25,00	33,33	91,67	33,33	1,00	2,00	3,00	2,00	-0,24	4,00	0,00	0,00	0,00	4,00	5,00	1,00	5,00	2,26	1,00	5,00	1,00	-2,83	2,00	2,00	3,00	-0,37	1,00
1	35	3,00	3	5,00	5	5	5	5	4	4	3	2	2	5	5	4	0,00	16,67	66,67	8,33	1,00	3,00	3,00	2,00	0,12	5,00	0,00	0,00	0,00	5,00	5,00	1,00	5,00	2,26	5,00	1,00	5,00	1,85	1,00	1,00	4,00	-0,71	0,44
1	33	2,00	1	3,00	3	3	3	3	2	2	3	3	2	5	5	2	50,00	66,67	58,33	25,00	2,00	2,00	2,00	2,00	-0,74	3,00	0,00	0,00	0,00	3,00	3,00	3,00	3,00	-0,64	4,00	1,00	4,00	1,03	2,00	3,00	4,00	0,29	2,42
1	42	1,00	4	4,00	4	2	3	3	2	3	2	2	2	3	3	3	50,00	58,33	75,00	50,00	0,00	2,00	3,00	3,00	0,26	4,00	0,00	1,00	0,00	4,00	4,00	3,00	3,00	-0,10	4,00	3,00	4,00	0,34	3,00	3,00	2,00	-0,04	0,49
2	56	3,00	1	4,00	3	4	4	4	2	2	1	1	1	4	4	4	33,33	58,33	100,00	25,00	0,00	2,00	2,00	2,00	-0,74	3,00	0,00	0,00	0,00	4,00	4,00	2,00	3,00	0,32	4,00	2,00	4,00	0,68	3,00	3,00	3,00	0,30	0,89
1	70	1,00	5	4,00	4	4	4	2	3	3	2	2	3	4	3	4	25,00	58,33	66,67	33,33	1,00	3,00	3,00	3,00	0,62	3,00	0,00	0,00	0,00	4,00	3,00	3,00	3,00	-0,64	4,00	3,00	4,00	0,34	3,00	4,00	3,00	0,63	0,41
2	68	1,00	4	3,00	3	3	3	3	2	2	1	1	1	3	3	3	50,00	66,67	100,00	50,00	0,00	3,00	4,00	2,00	0,62	3,00	0,00	0,00	1,00	5,00	4,00	2,00	4,00	0,81	4,00	2,00	4,00	0,68	2,00	2,00	2,00	-0,71	1,13
1	33	1,00	1	4,00	4	3	3	5	5	5	2	2	1	5	5	5	41,67	0,00	83,33	0,00	2,00	2,00	3,00	2,00	-0,24	5,00	0,00	0,00	0,00	2,00	4,00	3,00	4,00	0,39	5,00	2,00	5,00	1,51	1,00	1,00	1,00	-1,72	0,88
1	22	2,00	1	2,00	5	4	5	1	1	1	1	1	1	1	3	2	8,33	100,00	100,00	75,00	0,00	3,00	4,00	4,00	1,62	1,00	0,00	0,00	0,00	5,00	3,00	3,00	3,00	-0,64	3,00	3,00	3,00	-0,49	5,00	4,00	4,00	1,66	1,08
1	62	1,00	4	3,00	2	1	3	5	4	4	2	2	2	4	4	4	75,00	16,67	75,00	25,00	3,00	3,00	2,00	2,00	-0,38	5,00	0,00	0,00	1,00	3,00	4,00	3,00	4,00	0,39	4,00	2,00	4,00	0,68	2,00	3,00	2,00	-0,38	1,17
2	38	3,00	4	4,00	3	4	3	5	4	3	2	2	2	3	3	2	41,67	25,00	75,00	58,33	0,00	3,00	3,00	2,00	0,12	4,00	0,00	0,00	0,00	1,00	3,00	4,00	2,00	-1,54	4,00	2,00	4,00	0,68	1,00	1,00	1,00	-1,72	0,64
2	21	2,00	3	2,00	5	3	2	5	3	3	1	1	2	3	2	3	41,67	33,33	91,67	58,33	1,00	3,00	3,00	1,00	-0,38	2,00	0,00	0,00	0,00	3,00	5,00	1,00	5,00	2,26	5,00	1,00	5,00	1,85	1,00	2,00	4,00	-0,38	0,65
1	33	2,00	4	3,00	3	2	2	2	2	3	3	2	2	3	2	2	66,67	66,67	66,67	66,67	0,00	2,00	2,00	2,00	-0,74	3,00	0,00	0,00	0,00	4,00	.	.	.	.	4,00	3,00	3,00	-0,08	4,00	3,00	4,00	0,99	1,82
2	66	1,00	3	5,00	4	3	3	3	3	2	2	2	2	4	3	3	41,67	58,33	75,00	41,67	0,00	2,00	3,00	3,00	0,26	5,00	0,00	0,00	0,00	4,00	3,00	3,00	3,00	-0,64	3,00	3,00	3,00	-0,49	4,00	4,00	4,00	1,32	0,27
1	61	1,00	5	4,00	3	2	4	4	2	2	3	3	2	4	4	4	50,00	58,33	58,33	25,00	1,00	4,00	3,00	2,00	0,49	3,00	0,00	0,00	0,00	4,00	3,00	3,00	4,00	-0,15	4,00	4,00	2,00	-0,84	3,00	3,00	3,00	0,30	0,46
1	35	3,00	3	3,00	4	4	3	3	3	3	2	2	2	3	3	3	33,33	50,00	75,00	50,00	0,00	3,00	4,00	4,00	1,62	4,00	0,00	0,00	0,00	3,00	3,00	3,00	3,00	-0,64	3,00	3,00	3,00	-0,49	4,00	3,00	4,00	0,99	1,50
2	63	1,00	1	2,00	4	2	4	4	3	3	2	2	2	4	5	5	41,67	41,67	75,00	8,33	0,00	2,00	2,00	2,00	-0,74	4,00	1,00	0,00	0,00	3,00	3,00	3,00	3,00	-0,64	4,00	2,00	3,00	0,27	2,00	2,00	3,00	-0,37	0,64
2	35	3,00	2	4,00	1	1	1	2	1	1	1	2	1	1	1	1	100,00	91,67	91,67	100,00	0,00	5,00	4,00	4,00	2,36	.	0,00	0,00	0,00	4,00	4,00	4,00	4,00	-0,02	5,00	5,00	5,00	0,47	5,00	5,00	5,00	2,33	0,68
2	36	2,00	1	4,00	2	1	1	5	5	5	3	3	4	5	5	5	91,67	0,00	41,67	0,00	0,00	1,00	1,00	1,00	-2,11	5,00	1,00	0,00	1,00	1,00	2,00	4,00	2,00	-2,08	5,00	1,00	4,00	1,44	1,00	1,00	1,00	-1,72	0,85
2	66	1,00	3	3,00	5	1	1	5	5	5	5	5	5	5	5	5	66,67	0,00	0,00	0,00	0,00	2,00	2,00	2,00	-0,74	5,00	0,00	0,00	0,00	3,00	4,00	1,00	4,00	1,23	5,00	1,00	5,00	1,85	1,00	1,00	1,00	-1,72	0,93
1	27	2,00	1	4,00	3	3	3	3	2	2	2	2	2	5	5	5	50,00	66,67	75,00	0,00	0,00	1,00	5,00	5,00	1,89	2,00	0,00	0,00	0,00	4,00	4,00	2,00	2,00	-0,17	5,00	1,00	5,00	1,85	3,00	2,00	4,00	0,31	0,93
1	53	1,00	4	4,00	3	3	3	3	3	3	2	2	2	3	2	3	50,00	50,00	75,00	58,33	0,00	4,00	4,00	3,00	1,49	4,00	0,00	0,00	0,00	3,00	3,00	3,00	3,00	-0,64	3,00	3,00	3,00	-0,49	3,00	3,00	3,00	0,30	0,69
2	24	2,00	1	4,00	4	3	3	4	3	2	2	2	2	4	4	4	41,67	50,00	75,00	25,00	1,00	2,00	2,00	2,00	-0,74	4,00	0,00	0,00	0,00	3,00	4,00	1,00	3,00	0,74	5,00	2,00	5,00	1,51	1,00	1,00	4,00	-0,71	0,90
2	32	2,00	4	4,00	4	4	4	3	2	2	2	2	2	2	2	2	25,00	66,67	75,00	75,00	0,00	1,00	1,00	2,00	-1,61	1,00	0,00	0,00	0,00	3,00	3,00	2,00	3,00	-0,22	3,00	3,00	3,00	-0,49	3,00	3,00	3,00	0,30	0,64
1	27	1,00	1	5,00	4	2	4	1	1	1	1	1	1	1	1	1	41,67	100,00	100,00	100,00	0,00	1,00	1,00	1,00	-2,11	3,00	1,00	0,00	0,00	1,00	1,00	5,00	1,00	-3,53	1,00	5,00	1,00	-2,83	5,00	5,00	5,00	2,33	0,75
2	47	3,00	3	3,00	3	3	3	5	5	5	3	3	3	5	5	5	50,00	0,00	50,00	0,00	0,00	1,00	3,00	2,00	-0,61	3,00	0,00	0,00	0,00	4,00	4,00	1,00	4,00	1,23	3,00	3,00	4,00	-0,08	3,00	3,00	3,00	0,30	1,07
1	46	1,00	1	1,00	5	3	2	3	3	1	2	2	2	3	4	2	41,67	66,67	75,00	50,00	0,00	3,00	2,00	2,00	-0,38	4,00	0,00	0,00	0,00	3,00	4,00	4,00	4,00	-0,02	5,00	3,00	4,00	0,75	2,00	3,00	3,00	-0,05	3,82
1	25	2,00	3	1,00	1	1	1	5	5	5	5	5	5	5	5	5	100,00	0,00	0,00	0,00	0,00	1,00	1,00	2,00	-1,61	5,00	0,00	0,00	0,00	1,00	5,00	2,00	3,00	0,86	5,00	2,00	5,00	1,51	1,00	1,00	1,00	-1,72	3,37
1	70	2,00	3	3,00	4	2	3	4	3	2	5	2	2	5	5	4	50,00	50,00	50,00	8,33	0,00	4,00	4,00	2,00	0,99	2,00	0,00	1,00	0,00	4,00	3,00	3,00	2,00	-1,12	3,00	3,00	3,00	-0,49	2,00	2,00	3,00	-0,37	0,87
1	48	2,00	1	1,00	3	3	3	4	4	4	3	3	3	4	4	4	50,00	25,00	50,00	25,00	2,00	1,00	1,00	5,00	-0,11	3,00	0,00	0,00	0,00	1,00	1,00	1,00	1,00	-1,86	1,00	1,00	1,00	-1,45	1,00	1,00	5,00	-0,37	3,82
1	40	3,00	3	3,00	5	5	5	2	1	3	1	1	1	2	1	1	0,00	75,00	100,00	91,67	1,00	2,00	3,00	2,00	-0,24	2,00	0,00	0,00	0,00	5,00	5,00	2,00	5,00	1,84	2,00	2,00	4,00	-0,14	4,00	5,00	2,00	0,97	1,11
1	26	1,00	1	5,00	5	4	4	2	4	4	2	2	1	2	2	2	16,67	41,67	83,33	75,00	0,00	2,00	2,00	3,00	-0,25	3,00	0,00	0,00	0,00	2,00	4,00	1,00	4,00	1,23	3,00	4,00	4,00	-0,42	2,00	1,00	2,00	-1,04	0,75
2	51	1,00	2	4,00	3	1	2	5	4	3	3	3	2	3	3	3	75,00	25,00	58,33	50,00	1,00	5,00	4,00	3,00	1,86	4,00	0,00	0,00	0,00	4,00	4,00	3,00	3,00	-0,10	3,00	3,00	3,00	-0,49	3,00	3,00	1,00	-0,37	0,71
1	74	1,00	3	4,00	5	5	5	3	1	1	1	3	1	5	5	3	0,00	83,33	83,33	16,67	0,00	4,00	2,00	2,00	-0,01	5,00	0,00	0,00	0,00	3,00	5,00	3,00	3,00	0,45	5,00	3,00	3,00	0,34	3,00	5,00	5,00	1,63	0,31
1	59	2,00	1	3,00	3	1	1	5	5	3	3	2	2	5	5	3	83,33	16,67	66,67	16,67	0,00	3,00	3,00	2,00	0,12	3,00	0,00	0,00	0,00	1,00	3,00	3,00	3,00	-0,64	.	.	.	.	1,00	3,00	1,00	-1,07	2,53
1	48	3,00	2	4,00	5	5	5	4	2	2	1	1	1	4	2	2	0,00	58,33	100,00	58,33	0,00	2,00	4,00	2,00	0,26	3,00	0,00	0,00	0,00	2,00	4,00	2,00	4,00	0,81	4,00	3,00	3,00	-0,08	4,00	4,00	4,00	1,32	0,52
2	71	1,00	3	4,00	4	4	4	3	2	1	1	1	2	4	4	3	25,00	75,00	91,67	33,33	1,00	1,00	1,00	1,00	-2,11	5,00	1,00	0,00	0,00	4,00	3,00	4,00	3,00	-1,05	3,00	3,00	3,00	-0,49	2,00	2,00	2,00	-0,71	0,30
1	68	1,00	4	1,00	4	3	4	2	2	2	1	1	1	4	4	2	33,33	75,00	100,00	41,67	0,00	4,00	3,00	3,00	0,99	3,00	0,00	0,00	0,00	4,00	4,00	2,00	2,00	-0,17	2,00	3,00	2,00	-1,31	4,00	5,00	4,00	1,64	2,49
2	33	1,00	1	4,00	4	4	4	4	4	4	4	3	2	5	5	5	25,00	25,00	50,00	0,00	2,00	2,00	2,00	2,00	-0,74	3,00	0,00	1,00	0,00	3,00	3,00	3,00	3,00	-0,64	4,00	2,00	4,00	0,68	2,00	2,00	2,00	-0,71	0,85
1	26	2,00	3	3,00	4	4	4	2	2	2	2	2	2	2	2	2	25,00	75,00	75,00	75,00	0,00	2,00	1,00	1,00	-1,75	2,00	0,00	0,00	0,00	4,00	3,00	3,00	3,00	-0,64	2,00	3,00	3,00	-0,90	4,00	4,00	4,00	1,32	1,58
1	72	1,00	4	5,00	5	5	4	3	2	2	2	2	2	2	2	2	8,33	66,67	75,00	75,00	0,00	2,00	3,00	2,00	-0,24	3,00	0,00	0,00	1,00	4,00	3,00	3,00	3,00	-0,64	4,00	4,00	3,00	-0,42	3,00	3,00	3,00	0,30	0,31
1	34	3,00	3	2,00	4	1	1	5	5	5	4	4	4	5	5	5	75,00	0,00	25,00	0,00	1,00	3,00	2,00	2,00	-0,38	1,00	0,00	0,00	1,00	2,00	3,00	2,00	2,00	-0,71	3,00	2,00	2,00	-0,55	2,00	2,00	2,00	-0,71	0,64
1	28	3,00	1	5,00	1	2	1	2	1	1	1	2	2	1	1	2	91,67	91,67	83,33	91,67	0,00	5,00	5,00	5,00	3,36	.	0,00	0,00	0,00	5,00	5,00	5,00	5,00	0,59	5,00	5,00	5,00	0,47	5,00	4,00	4,00	1,66	0,75
1	55	1,00	4	3,00	5	2	5	2	2	2	1	1	1	2	2	2	25,00	75,00	100,00	75,00	1,00	2,00	3,00	3,00	0,26	1,00	0,00	0,00	0,00	3,00	3,00	2,00	4,00	0,27	3,00	3,00	3,00	-0,49	3,00	3,00	3,00	0,30	1,89
1	42	2,00	1	2,00	4	4	4	4	2	2	2	2	2	3	2	2	25,00	58,33	75,00	66,67	1,00	2,00	3,00	2,00	-0,24	3,00	0,00	0,00	0,00	3,00	4,00	2,00	4,00	0,81	4,00	2,00	4,00	0,68	3,00	4,00	4,00	0,97	0,76
2	49	3,00	4	3,00	3	3	2	5	4	4	2	2	2	4	4	4	58,33	16,67	75,00	25,00	0,00	3,00	4,00	2,00	0,62	4,00	0,00	0,00	1,00	4,00	3,00	2,00	3,00	-0,22	4,00	2,00	4,00	0,68	3,00	3,00	4,00	0,64	1,30
1	65	3,00	3	4,00	5	3	3	4	4	4	1	1	1	4	4	4	33,33	25,00	100,00	25,00	0,00	1,00	3,00	2,00	-0,61	4,00	0,00	0,00	0,00	3,00	4,00	2,00	3,00	0,32	3,00	3,00	3,00	-0,49	2,00	3,00	3,00	-0,05	0,35
1	28	2,00	2	4,00	3	3	2	4	4	4	2	2	2	4	3	2	58,33	25,00	75,00	50,00	0,00	2,00	1,00	3,00	-0,75	3,00	0,00	0,00	1,00	3,00	3,00	3,00	3,00	-0,64	3,00	2,00	4,00	0,27	2,00	2,00	2,00	-0,71	0,74
2	53	1,00	4	4,00	4	4	3	5	4	4	3	2	2	5	5	5	33,33	16,67	66,67	0,00	0,00	2,00	4,00	2,00	0,26	2,00	0,00	0,00	0,00	2,00	3,00	3,00	2,00	-1,12	4,00	3,00	4,00	0,34	2,00	2,00	2,00	-0,71	0,67
2	21	3,00	3	2,00	4	3	3	4	3	3	2	2	2	4	3	3	41,67	41,67	75,00	41,67	1,00	1,00	3,00	3,00	-0,11	2,00	0,00	0,00	0,00	3,00	3,00	2,00	4,00	0,27	4,00	2,00	2,00	-0,14	2,00	3,00	4,00	0,29	0,65
2	44	3,00	4	3,00	4	4	4	4	4	2	2	2	2	3	3	4	25,00	41,67	75,00	41,67	0,00	3,00	2,00	3,00	0,12	2,00	0,00	0,00	0,00	3,00	3,00	3,00	3,00	-0,64	4,00	2,00	4,00	0,68	3,00	2,00	3,00	-0,02	1,30
1	45	3,00	2	5,00	4	4	4	3	2	2	2	2	2	2	3	2	25,00	66,67	75,00	66,67	2,00	2,00	2,00	2,00	-0,74	3,00	0,00	0,00	0,00	4,00	4,00	2,00	4,00	0,81	4,00	2,00	4,00	0,68	4,00	4,00	4,00	1,32	0,42
2	70	2,00	2	5,00	3	1	1	5	5	5	3	3	2	5	5	5	83,33	0,00	58,33	0,00	0,00	2,00	2,00	2,00	-0,74	5,00	0,00	1,00	0,00	2,00	2,00	4,00	3,00	-1,59	5,00	1,00	4,00	1,44	1,00	1,00	1,00	-1,72	0,32
2	36	3,00	1	4,00	3	4	4	5	4	3	3	3	2	4	4	3	33,33	25,00	58,33	33,33	0,00	2,00	3,00	3,00	0,26	3,00	0,00	1,00	0,00	2,00	4,00	2,00	4,00	0,81	4,00	3,00	3,00	-0,08	2,00	2,00	2,00	-0,71	0,85
1	27	1,00	1	3,00	2	2	3	3	3	2	3	3	2	4	3	4	66,67	58,33	58,33	33,33	0,00	1,00	2,00	2,00	-1,11	4,00	0,00	1,00	0,00	3,00	4,00	3,00	4,00	0,39	4,00	2,00	4,00	0,68	3,00	2,00	4,00	0,31	2,55
2	62	1,00	3	4,00	4	4	4	2	3	2	2	2	2	4	4	3	25,00	66,67	75,00	33,33	0,00	5,00	3,00	1,00	0,35	4,00	0,00	0,00	0,00	5,00	3,00	3,00	4,00	-0,15	3,00	3,00	3,00	-0,49	4,00	4,00	3,00	0,98	0,34
1	70	1,00	1	3,00	4	4	4	3	3	3	2	2	2	3	3	3	25,00	50,00	75,00	50,00	0,00	4,00	4,00	4,00	1,99	3,00	0,00	0,00	0,00	3,00	3,00	3,00	3,00	-0,64	3,00	3,00	3,00	-0,49	3,00	3,00	3,00	0,30	1,40
2	43	1,00	2	4,00	5	3	4	4	4	3	2	2	2	2	3	3	25,00	33,33	75,00	58,33	0,00	3,00	2,00	1,00	-0,88	3,00	0,00	1,00	0,00	2,00	5,00	2,00	4,00	1,35	3,00	3,00	4,00	-0,08	2,00	2,00	3,00	-0,37	0,50
2	58	2,00	3	1,00	4	4	4	3	2	2	2	2	2	3	3	3	25,00	66,67	75,00	50,00	0,00	2,00	2,00	2,00	-0,74	4,00	0,00	0,00	1,00	3,00	4,00	2,00	4,00	0,81	4,00	2,00	4,00	0,68	2,00	2,00	3,00	-0,37	3,24
2	72	2,00	1	5,00	4	3	4	4	2	4	2	2	2	4	3	2	33,33	41,67	75,00	50,00	1,00	1,00	1,00	1,00	-2,11	3,00	1,00	1,00	0,00	2,00	4,00	2,00	4,00	0,81	3,00	3,00	4,00	-0,08	4,00	4,00	3,00	0,98	0,40
1	24	1,00	1	5,00	5	4	4	5	2	2	2	2	2	3	2	3	16,67	50,00	75,00	58,33	0,00	4,00	2,00	2,00	-0,01	1,00	0,00	0,00	0,00	2,00	3,00	2,00	3,00	-0,22	4,00	2,00	4,00	0,68	2,00	2,00	4,00	-0,03	0,75
2	33	3,00	1	4,00	3	3	3	5	5	5	3	3	3	5	5	5	50,00	0,00	50,00	0,00	1,00	2,00	2,00	3,00	-0,25	3,00	0,00	0,00	0,00	3,00	3,00	3,00	3,00	-0,64	4,00	2,00	3,00	0,27	2,00	2,00	3,00	-0,37	0,85
2	51	3,00	3	5,00	5	4	4	1	1	1	1	1	1	1	2	1	16,67	100,00	100,00	91,67	1,00	2,00	3,00	3,00	0,26	2,00	0,00	0,00	0,00	4,00	4,00	2,00	4,00	0,81	4,00	2,00	4,00	0,68	2,00	2,00	3,00	-0,37	0,45
1	32	3,00	5	5,00	4	4	3	2	2	2	2	2	2	1	1	1	33,33	75,00	75,00	100,00	1,00	5,00	4,00	2,00	1,36	2,00	0,00	0,00	1,00	4,00	5,00	2,00	4,00	1,35	4,00	4,00	4,00	-0,01	4,00	5,00	4,00	1,64	0,57
2	25	3,00	3	2,00	4	2	1	5	5	3	2	1	1	3	4	3	66,67	16,67	91,67	41,67	0,00	2,00	2,00	1,00	-1,24	2,00	1,00	0,00	0,00	1,00	4,00	2,00	4,00	0,81	.	.	.	.	1,00	1,00	1,00	-1,72	0,65
2	27	3,00	1	5,00	1	1	1	5	5	5	5	3	3	5	5	5	100,00	0,00	33,33	0,00	1,00	1,00	1,00	1,00	-2,11	5,00	1,00	0,00	0,00	1,00	5,00	2,00	5,00	1,84	5,00	1,00	5,00	1,85	1,00	1,00	1,00	-1,72	0,72
1	73	1,00	3	1,00	4	3	3	3	3	2	2	3	2	3	3	3	41,67	58,33	66,67	50,00	0,00	3,00	3,00	2,00	0,12	4,00	0,00	0,00	0,00	3,00	3,00	3,00	3,00	-0,64	3,00	3,00	3,00	-0,49	3,00	3,00	3,00	0,30	1,85
2	58	1,00	3	4,00	3	3	3	3	2	2	2	2	2	4	4	4	50,00	66,67	75,00	25,00	1,00	4,00	3,00	3,00	0,99	3,00	0,00	0,00	0,00	4,00	3,00	3,00	4,00	-0,15	2,00	4,00	3,00	-1,25	4,00	4,00	4,00	1,32	0,55
1	37	3,00	3	4,00	5	5	5	3	1	1	2	1	1	3	3	3	0,00	83,33	91,67	50,00	2,00	2,00	2,00	2,00	-0,74	3,00	0,00	0,00	0,00	4,00	4,00	4,00	4,00	-0,02	4,00	3,00	4,00	0,34	3,00	3,00	4,00	0,64	0,55
1	23	1,00	2	1,00	3	3	3	4	4	3	2	2	1	5	5	4	50,00	33,33	83,33	8,33	1,00	2,00	3,00	2,00	-0,24	3,00	0,00	0,00	0,00	3,00	4,00	2,00	2,00	-0,17	4,00	2,00	3,00	0,27	2,00	2,00	3,00	-0,37	4,35
2	42	2,00	4	4,00	3	3	3	4	4	4	2	2	2	4	4	4	50,00	25,00	75,00	25,00	0,00	2,00	3,00	3,00	0,26	4,00	0,00	0,00	1,00	2,00	3,00	4,00	2,00	-1,54	4,00	2,00	4,00	0,68	2,00	2,00	2,00	-0,71	0,47
2	61	2,00	1	4,00	5	4	4	3	2	2	2	4	2	4	4	3	16,67	66,67	58,33	33,33	2,00	2,00	2,00	2,00	-0,74	2,00	0,00	1,00	0,00	5,00	4,00	2,00	4,00	0,81	3,00	3,00	2,00	-0,90	3,00	4,00	4,00	0,97	0,55
2	47	3,00	3	3,00	4	3	3	4	3	3	3	3	2	4	4	4	41,67	41,67	58,33	25,00	1,00	2,00	2,00	3,00	-0,25	3,00	0,00	1,00	0,00	3,00	3,00	3,00	3,00	-0,64	4,00	3,00	4,00	0,34	2,00	2,00	2,00	-0,71	1,07
2	22	1,00	1	2,00	3	3	3	3	2	2	3	3	3	5	5	5	50,00	66,67	50,00	0,00	0,00	1,00	1,00	2,00	-1,61	5,00	1,00	0,00	0,00	1,00	3,00	2,00	3,00	-0,22	4,00	2,00	4,00	0,68	1,00	1,00	3,00	-1,05	1,05
1	72	1,00	1	4,00	4	3	5	5	2	2	2	1	2	4	4	4	25,00	50,00	83,33	25,00	0,00	3,00	3,00	3,00	0,62	4,00	0,00	0,00	0,00	3,00	4,00	3,00	4,00	0,39	4,00	3,00	4,00	0,34	2,00	2,00	2,00	-0,71	0,51
1	22	2,00	3	2,00	4	3	4	3	2	4	2	2	2	2	2	2	33,33	50,00	75,00	75,00	0,00	1,00	2,00	3,00	-0,61	3,00	0,00	0,00	0,00	2,00	3,00	2,00	4,00	0,27	4,00	2,00	4,00	0,68	2,00	2,00	3,00	-0,37	0,67
1	22	1,00	1	2,00	4	4	1	5	5	3	3	1	1	5	5	5	50,00	16,67	83,33	0,00	2,00	5,00	3,00	3,00	1,35	2,00	0,00	0,00	0,00	2,00	4,00	2,00	4,00	0,81	3,00	2,00	4,00	0,27	2,00	2,00	2,00	-0,71	1,08
2	22	2,00	1	2,00	4	4	4	3	2	1	2	2	1	4	4	4	25,00	75,00	83,33	25,00	0,00	1,00	2,00	1,00	-1,61	4,00	0,00	0,00	0,00	2,00	4,00	2,00	2,00	-0,17	4,00	1,00	2,00	0,21	1,00	2,00	4,00	-0,38	1,05
1	28	3,00	2	4,00	2	1	1	1	2	1	1	1	2	1	2	2	91,67	91,67	91,67	83,33	0,00	5,00	5,00	5,00	3,36	.	0,00	0,00	0,00	5,00	5,00	5,00	5,00	0,59	5,00	5,00	5,00	0,47	4,00	4,00	5,00	1,65	0,74
2	60	2,00	4	5,00	5	5	5	4	1	1	1	1	1	4	4	1	0,00	75,00	100,00	50,00	0,00	3,00	5,00	2,00	1,13	3,00	0,00	0,00	0,00	3,00	2,00	4,00	2,00	-2,08	4,00	3,00	3,00	-0,08	4,00	4,00	2,00	0,64	0,33
1	26	2,00	2	2,00	4	2	3	4	3	3	4	2	3	2	4	2	50,00	41,67	50,00	58,33	1,00	4,00	3,00	3,00	0,99	.	0,00	0,00	0,00	3,00	.	.	.	.	2,00	3,00	4,00	-0,49	2,00	4,00	2,00	-0,06	0,87
1	21	1,00	4	2,00	4	2	2	4	2	2	2	2	2	4	4	4	58,33	58,33	75,00	25,00	0,00	1,00	2,00	2,00	-1,11	5,00	0,00	0,00	0,00	2,00	3,00	2,00	3,00	-0,22	3,00	2,00	4,00	0,27	2,00	2,00	2,00	-0,71	0,81
2	42	3,00	4	3,00	4	3	4	4	4	2	2	2	2	3	4	4	33,33	41,67	75,00	33,33	1,00	1,00	3,00	2,00	-0,61	4,00	0,00	0,00	0,00	4,00	4,00	3,00	4,00	0,39	3,00	3,00	2,00	-0,90	2,00	2,00	2,00	-0,71	1,30
2	57	1,00	4	1,00	3	2	3	5	5	5	3	3	2	5	5	5	58,33	0,00	58,33	0,00	0,00	1,00	3,00	1,00	-1,11	4,00	0,00	0,00	1,00	4,00	5,00	1,00	5,00	2,26	5,00	2,00	5,00	1,51	1,00	1,00	2,00	-1,39	3,92
1	72	1,00	3	4,00	3	3	2	4	4	3	1	2	2	4	3	4	58,33	33,33	83,33	33,33	1,00	3,00	3,00	3,00	0,62	2,00	0,00	0,00	1,00	4,00	3,00	3,00	3,00	-0,64	3,00	3,00	3,00	-0,49	3,00	4,00	4,00	0,97	0,31
2	23	1,00	4	2,00	1	1	1	4	3	3	4	2	3	3	3	3	100,00	41,67	50,00	50,00	0,00	1,00	2,00	1,00	-1,61	5,00	0,00	0,00	0,00	2,00	4,00	2,00	4,00	0,81	4,00	2,00	4,00	0,68	2,00	2,00	3,00	-0,37	0,79
2	64	1,00	4	3,00	4	3	3	4	3	4	2	2	2	4	4	3	41,67	33,33	75,00	33,33	1,00	1,00	2,00	2,00	-1,11	4,00	1,00	0,00	0,00	3,00	4,00	2,00	4,00	0,81	3,00	3,00	3,00	-0,49	2,00	2,00	3,00	-0,37	1,13
2	46	1,00	2	4,00	5	5	5	4	1	1	1	1	1	1	1	1	0,00	75,00	100,00	100,00	0,00	1,00	4,00	2,00	-0,11	2,00	0,00	1,00	0,00	4,00	4,00	2,00	4,00	0,81	4,00	2,00	4,00	0,68	4,00	4,00	2,00	0,64	0,50
2	73	1,00	1	1,00	3	3	3	4	4	2	2	2	2	4	4	4	50,00	41,67	75,00	25,00	1,00	1,00	4,00	2,00	-0,11	3,00	0,00	0,00	0,00	3,00	4,00	3,00	3,00	-0,10	4,00	2,00	4,00	0,68	2,00	2,00	2,00	-0,71	2,89
1	40	2,00	4	1,00	5	3	3	2	4	4	2	1	1	4	4	5	33,33	41,67	91,67	16,67	0,00	3,00	2,00	1,00	-0,88	3,00	0,00	0,00	0,00	5,00	3,00	3,00	3,00	-0,64	3,00	3,00	3,00	-0,49	2,00	3,00	3,00	-0,05	2,87
2	70	1,00	1	4,00	4	4	3	4	4	2	1	1	1	4	4	2	33,33	41,67	100,00	41,67	1,00	2,00	2,00	2,00	-0,74	5,00	0,00	0,00	1,00	2,00	4,00	2,00	4,00	0,81	5,00	3,00	5,00	1,16	3,00	4,00	2,00	0,29	0,49
2	27	1,00	1	5,00	3	2	2	2	1	1	1	1	1	3	2	1	66,67	91,67	100,00	75,00	1,00	3,00	4,00	4,00	1,62	2,00	0,00	0,00	0,00	4,00	2,00	3,00	3,00	-1,18	4,00	3,00	3,00	-0,08	3,00	3,00	3,00	0,30	0,72
2	28	2,00	4	2,00	3	3	3	3	3	3	2	2	2	2	2	4	50,00	50,00	75,00	58,33	0,00	4,00	2,00	3,00	0,49	2,00	0,00	1,00	0,00	2,00	4,00	3,00	3,00	-0,10	5,00	2,00	3,00	0,68	2,00	3,00	3,00	-0,05	0,79
1	69	1,00	3	4,00	5	4	4	4	2	3	3	2	2	5	5	4	16,67	50,00	66,67	8,33	1,00	3,00	4,00	2,00	0,62	5,00	0,00	1,00	1,00	1,00	4,00	3,00	3,00	-0,10	4,00	3,00	3,00	-0,08	2,00	1,00	3,00	-0,70	0,35
2	71	1,00	3	4,00	4	4	4	3	2	2	2	2	2	2	2	2	25,00	66,67	75,00	75,00	0,00	5,00	5,00	5,00	3,36	2,00	0,00	0,00	0,00	5,00	3,00	4,00	3,00	-1,05	1,00	5,00	1,00	-2,83	4,00	5,00	4,00	1,64	0,30
2	49	1,00	4	3,00	4	4	4	3	2	1	1	1	1	4	2	4	25,00	75,00	100,00	41,67	0,00	3,00	4,00	2,00	0,62	4,00	0,00	1,00	1,00	4,00	4,00	2,00	4,00	0,81	3,00	3,00	2,00	-0,90	1,00	2,00	2,00	-1,06	1,30
2	46	3,00	3	4,00	4	4	4	3	3	2	2	2	2	2	4	3	25,00	58,33	75,00	50,00	1,00	3,00	4,00	2,00	0,62	3,00	0,00	1,00	0,00	5,00	4,00	2,00	4,00	0,81	2,00	1,00	2,00	-0,62	4,00	5,00	5,00	1,98	0,39
2	57	2,00	4	4,00	3	2	2	5	4	4	4	4	2	5	5	5	66,67	16,67	41,67	0,00	0,00	2,00	2,00	2,00	-0,74	4,00	0,00	1,00	0,00	2,00	4,00	2,00	3,00	0,32	4,00	2,00	4,00	0,68	2,00	2,00	3,00	-0,37	0,67
1	47	3,00	3	4,00	5	5	5	2	1	1	1	1	1	2	4	2	0,00	91,67	100,00	58,33	0,00	5,00	2,00	2,00	0,35	4,00	0,00	0,00	1,00	3,00	4,00	2,00	4,00	0,81	4,00	2,00	4,00	0,68	1,00	2,00	2,00	-1,06	0,40
1	61	1,00	1	3,00	5	3	5	3	2	1	1	1	1	3	3	3	16,67	75,00	100,00	50,00	1,00	2,00	1,00	2,00	-1,25	5,00	0,00	0,00	0,00	4,00	3,00	3,00	3,00	-0,64	3,00	3,00	3,00	-0,49	5,00	5,00	5,00	2,33	1,56
2	49	3,00	4	5,00	3	3	3	3	3	3	2	2	2	3	3	3	50,00	50,00	75,00	50,00	0,00	4,00	4,00	2,00	0,99	5,00	0,00	0,00	1,00	2,00	3,00	3,00	3,00	-0,64	5,00	1,00	5,00	1,85	2,00	2,00	3,00	-0,37	0,38
1	59	2,00	4	5,00	5	5	5	5	2	5	1	1	1	5	5	3	0,00	25,00	100,00	16,67	0,00	3,00	3,00	3,00	0,62	2,00	0,00	0,00	0,00	3,00	3,00	3,00	3,00	-0,64	3,00	2,00	3,00	-0,14	1,00	2,00	4,00	-0,38	0,56
2	68	1,00	1	5,00	4	4	4	4	4	3	2	2	2	4	4	4	25,00	33,33	75,00	25,00	2,00	2,00	2,00	2,00	-0,74	3,00	1,00	0,00	0,00	3,00	4,00	3,00	2,00	-0,58	3,00	3,00	3,00	-0,49	3,00	3,00	3,00	0,30	0,44
2	48	3,00	4	1,00	3	3	3	4	3	3	2	2	2	4	4	4	50,00	41,67	75,00	25,00	2,00	4,00	4,00	2,00	0,99	3,00	0,00	0,00	0,00	2,00	4,00	3,00	4,00	0,39	4,00	3,00	4,00	0,34	2,00	2,00	2,00	-0,71	2,77
2	31	3,00	3	4,00	4	3	4	5	3	4	2	2	2	5	5	4	33,33	25,00	75,00	8,33	2,00	2,00	3,00	2,00	-0,24	3,00	0,00	1,00	0,00	3,00	3,00	2,00	3,00	-0,22	3,00	2,00	3,00	-0,14	2,00	2,00	2,00	-0,71	0,53
1	71	1,00	5	4,00	4	3	4	3	2	1	2	2	2	4	4	4	33,33	75,00	75,00	25,00	0,00	4,00	4,00	2,00	0,99	2,00	0,00	0,00	0,00	3,00	3,00	3,00	3,00	-0,64	3,00	3,00	3,00	-0,49	2,00	3,00	3,00	-0,05	0,41
2	51	3,00	4	4,00	4	4	5	5	3	2	2	2	1	4	4	4	16,67	41,67	83,33	25,00	1,00	4,00	2,00	3,00	0,49	3,00	0,00	1,00	0,00	3,00	3,00	3,00	3,00	-0,64	3,00	3,00	3,00	-0,49	3,00	4,00	3,00	0,63	0,67
2	21	2,00	4	4,00	4	3	3	2	4	3	2	2	2	2	2	2	41,67	50,00	75,00	75,00	1,00	2,00	2,00	2,00	-0,74	2,00	0,00	1,00	1,00	4,00	1,00	2,00	2,00	-1,79	1,00	2,00	2,00	-1,38	4,00	5,00	4,00	1,64	0,67
2	72	1,00	1	4,00	3	3	3	3	3	3	2	3	3	3	2	3	50,00	50,00	58,33	58,33	3,00	2,00	1,00	3,00	-0,75	4,00	0,00	0,00	0,00	4,00	3,00	3,00	3,00	-0,64	3,00	3,00	3,00	-0,49	3,00	4,00	3,00	0,63	0,49
1	27	1,00	4	5,00	3	3	2	5	5	4	4	3	2	5	5	5	58,33	8,33	50,00	0,00	0,00	1,00	1,00	1,00	-2,11	.	0,00	0,00	0,00	1,00	3,00	3,00	3,00	-0,64	4,00	2,00	4,00	0,68	1,00	1,00	2,00	-1,39	0,56
1	37	2,00	4	4,00	4	4	3	4	4	4	2	2	2	4	5	4	33,33	25,00	75,00	16,67	0,00	2,00	4,00	1,00	-0,24	2,00	0,00	1,00	0,00	1,00	3,00	5,00	2,00	-1,96	5,00	1,00	5,00	1,85	1,00	1,00	1,00	-1,72	0,66
1	30	1,00	3	1,00	5	5	5	5	3	5	5	5	5	5	5	3	0,00	16,67	0,00	16,67	1,00	3,00	4,00	3,00	1,12	3,00	0,00	1,00	0,00	3,00	4,00	4,00	4,00	-0,02	3,00	3,00	4,00	-0,08	3,00	3,00	3,00	0,30	3,21
2	24	1,00	4	2,00	5	4	4	3	2	2	1	1	1	4	3	3	16,67	66,67	100,00	41,67	0,00	3,00	2,00	3,00	0,12	2,00	0,00	0,00	0,00	3,00	4,00	2,00	4,00	0,81	2,00	2,00	3,00	-0,56	4,00	3,00	4,00	0,99	0,79
2	67	2,00	5	3,00	4	4	1	5	2	3	1	4	2	5	5	3	50,00	41,67	66,67	16,67	1,00	2,00	2,00	2,00	-0,74	2,00	0,00	0,00	0,00	3,00	5,00	1,00	4,00	1,77	3,00	3,00	3,00	-0,49	1,00	1,00	3,00	-1,05	1,21
2	65	1,00	1	5,00	2	2	1	3	3	3	2	3	2	4	3	3	83,33	50,00	66,67	41,67	0,00	4,00	2,00	2,00	-0,01	4,00	1,00	0,00	0,00	5,00	4,00	2,00	4,00	0,81	1,00	4,00	2,00	-2,07	2,00	2,00	2,00	-0,71	0,44
1	21	3,00	3	1,00	4	4	4	3	3	3	3	3	3	3	3	3	25,00	50,00	50,00	50,00	0,00	2,00	3,00	2,00	-0,24	3,00	0,00	0,00	1,00	3,00	3,00	3,00	4,00	-0,15	3,00	2,00	3,00	-0,14	3,00	3,00	3,00	0,30	3,37
2	22	2,00	3	2,00	3	2	2	4	5	3	4	4	2	5	5	5	66,67	25,00	41,67	0,00	0,00	1,00	1,00	2,00	-1,61	4,00	1,00	0,00	1,00	2,00	4,00	2,00	4,00	0,81	4,00	2,00	4,00	0,68	2,00	1,00	1,00	-1,38	0,65
1	57	1,00	4	3,00	2	2	2	5	4	4	4	4	4	4	5	4	75,00	16,67	25,00	16,67	0,00	3,00	3,00	2,00	0,12	4,00	0,00	1,00	1,00	4,00	2,00	4,00	1,00	-2,57	4,00	2,00	5,00	1,09	1,00	2,00	1,00	-1,40	1,89
1	38	2,00	4	4,00	5	4	4	5	5	4	2	1	1	4	4	3	16,67	8,33	91,67	33,33	0,00	3,00	3,00	2,00	0,12	3,00	0,00	0,00	0,00	2,00	4,00	3,00	3,00	-0,10	4,00	3,00	3,00	-0,08	1,00	2,00	2,00	-1,06	0,66
1	72	1,00	3	5,00	5	5	5	2	2	2	3	2	1	5	4	2	0,00	75,00	75,00	33,33	2,00	3,00	3,00	2,00	0,12	1,00	0,00	0,00	0,00	5,00	5,00	1,00	5,00	2,26	.	.	.	.	5,00	4,00	3,00	1,32	0,25
1	43	3,00	1	4,00	4	4	5	1	1	1	1	1	3	1	1	1	16,67	100,00	83,33	100,00	0,00	3,00	3,00	3,00	0,62	2,00	0,00	1,00	0,00	3,00	4,00	2,00	3,00	0,32	3,00	3,00	3,00	-0,49	4,00	4,00	4,00	1,32	0,65
1	42	3,00	3	4,00	3	3	3	3	3	3	3	3	3	3	3	3	50,00	50,00	50,00	50,00	0,00	4,00	4,00	4,00	1,99	1,00	0,00	0,00	0,00	3,00	3,00	3,00	3,00	-0,64	3,00	3,00	3,00	-0,49	4,00	4,00	3,00	0,98	0,40
2	39	2,00	1	5,00	2	1	1	5	4	5	2	4	4	4	4	4	91,67	8,33	41,67	25,00	2,00	3,00	2,00	2,00	-0,38	5,00	0,00	0,00	0,00	2,00	4,00	3,00	4,00	0,39	5,00	3,00	5,00	1,16	1,00	1,00	1,00	-1,72	0,69
2	43	1,00	3	3,00	5	3	5	3	3	2	1	1	2	3	3	3	16,67	58,33	91,67	50,00	0,00	2,00	3,00	2,00	-0,24	4,00	0,00	0,00	0,00	4,00	4,00	1,00	4,00	1,23	4,00	2,00	4,00	0,68	3,00	3,00	2,00	-0,04	1,07
1	27	1,00	4	5,00	4	4	3	2	2	2	2	2	3	4	4	3	33,33	75,00	66,67	33,33	1,00	5,00	1,00	4,00	0,85	2,00	1,00	0,00	0,00	4,00	4,00	3,00	4,00	0,39	5,00	2,00	4,00	1,10	3,00	3,00	4,00	0,64	0,56
2	42	1,00	5	3,00	5	4	5	5	2	5	1	1	2	4	4	2	8,33	25,00	91,67	41,67	1,00	2,00	3,00	2,00	-0,24	1,00	0,00	0,00	1,00	2,00	3,00	4,00	2,00	-1,54	4,00	1,00	4,00	1,03	2,00	3,00	3,00	-0,05	1,40
1	44	3,00	3	5,00	4	4	4	4	3	3	2	1	2	3	3	2	25,00	41,67	83,33	58,33	1,00	4,00	2,00	2,00	-0,01	4,00	0,00	0,00	1,00	3,00	3,00	3,00	3,00	-0,64	4,00	2,00	5,00	1,09	2,00	3,00	3,00	-0,05	0,33
1	30	3,00	1	4,00	2	2	2	3	3	2	2	2	3	3	3	2	75,00	58,33	66,67	58,33	0,00	4,00	4,00	4,00	1,99	.	0,00	0,00	0,00	4,00	4,00	4,00	3,00	-0,51	4,00	4,00	4,00	-0,01	4,00	4,00	5,00	1,65	0,88
1	21	3,00	1	2,00	4	4	4	5	5	1	3	3	3	5	3	3	25,00	33,33	50,00	33,33	0,00	5,00	3,00	3,00	1,35	3,00	1,00	0,00	0,00	5,00	1,00	5,00	1,00	-3,53	1,00	5,00	1,00	-2,83	5,00	5,00	5,00	2,33	1,08
2	28	3,00	2	5,00	2	5	1	5	5	5	5	2	2	5	5	5	58,33	0,00	50,00	0,00	0,00	4,00	3,00	2,00	0,49	4,00	1,00	1,00	1,00	2,00	4,00	4,00	4,00	-0,02	4,00	4,00	4,00	-0,01	1,00	2,00	1,00	-1,40	0,58
1	74	1,00	2	2,00	4	4	4	2	2	2	3	2	2	3	3	3	25,00	75,00	66,67	50,00	0,00	4,00	4,00	2,00	0,99	2,00	0,00	0,00	0,00	5,00	5,00	1,00	5,00	2,26	3,00	3,00	2,00	-0,90	4,00	5,00	4,00	1,64	0,48
2	43	3,00	2	3,00	5	5	5	4	4	2	1	1	1	3	2	2	0,00	41,67	100,00	66,67	1,00	4,00	3,00	3,00	0,99	3,00	0,00	0,00	1,00	3,00	3,00	3,00	3,00	-0,64	3,00	3,00	3,00	-0,49	2,00	3,00	2,00	-0,38	1,39
2	58	1,00	4	4,00	3	3	3	5	5	5	2	2	3	5	5	5	50,00	0,00	66,67	0,00	1,00	4,00	5,00	5,00	2,99	4,00	0,00	0,00	1,00	3,00	5,00	1,00	5,00	2,26	5,00	1,00	5,00	1,85	1,00	1,00	1,00	-1,72	0,67
2	48	3,00	5	5,00	5	4	4	3	2	2	2	1	1	3	3	2	16,67	66,67	91,67	58,33	1,00	3,00	2,00	2,00	-0,38	3,00	0,00	1,00	1,00	5,00	5,00	1,00	4,00	1,77	2,00	4,00	2,00	-1,66	3,00	4,00	3,00	0,63	0,41
2	69	2,00	2	4,00	5	5	1	4	3	4	1	1	1	4	4	4	33,33	33,33	100,00	25,00	0,00	2,00	2,00	2,00	-0,74	3,00	0,00	0,00	0,00	3,00	5,00	1,00	5,00	2,26	4,00	3,00	4,00	0,34	2,00	2,00	2,00	-0,71	0,44
1	32	3,00	4	5,00	4	3	4	4	1	1	1	1	1	3	3	3	33,33	75,00	100,00	50,00	2,00	3,00	2,00	2,00	-0,38	3,00	0,00	0,00	0,00	4,00	2,00	2,00	2,00	-1,25	2,00	1,00	2,00	-0,62	4,00	5,00	4,00	1,64	0,53
1	66	1,00	4	4,00	4	4	4	3	3	3	2	2	2	2	2	2	25,00	50,00	75,00	75,00	1,00	3,00	2,00	2,00	-0,38	4,00	0,00	0,00	0,00	4,00	4,00	2,00	4,00	0,81	3,00	3,00	3,00	-0,49	2,00	2,00	3,00	-0,37	0,42
1	43	3,00	2	2,00	3	1	3	4	2	2	2	2	2	5	4	4	66,67	58,33	75,00	16,67	1,00	3,00	3,00	3,00	0,62	4,00	0,00	0,00	0,00	4,00	4,00	2,00	4,00	0,81	4,00	4,00	4,00	-0,01	5,00	4,00	4,00	1,66	0,61
2	43	3,00	4	4,00	2	2	2	4	2	2	2	2	2	4	3	4	75,00	58,33	75,00	33,33	0,00	2,00	2,00	1,00	-1,24	4,00	1,00	0,00	0,00	2,00	4,00	2,00	4,00	0,81	4,00	2,00	4,00	0,68	2,00	2,00	3,00	-0,37	0,47
2	25	1,00	4	4,00	5	4	4	4	4	4	1	1	1	4	2	2	16,67	25,00	100,00	58,33	1,00	4,00	3,00	3,00	0,99	3,00	0,00	0,00	0,00	4,00	5,00	1,00	5,00	2,26	3,00	2,00	4,00	0,27	3,00	3,00	3,00	0,30	0,67
1	55	3,00	4	3,00	3	2	2	5	4	3	3	3	3	4	4	4	66,67	25,00	50,00	25,00	0,00	5,00	1,00	1,00	-0,65	3,00	0,00	0,00	0,00	3,00	4,00	3,00	3,00	-0,10	3,00	4,00	2,00	-1,25	3,00	3,00	2,00	-0,04	1,89
2	48	2,00	1	4,00	5	4	3	3	4	4	2	2	2	3	5	4	25,00	33,33	75,00	25,00	0,00	3,00	1,00	4,00	0,12	3,00	0,00	0,00	0,00	2,00	5,00	2,00	4,00	1,35	5,00	2,00	5,00	1,51	2,00	3,00	2,00	-0,38	0,63
1	69	1,00	4	3,00	4	4	4	3	3	3	4	2	2	3	3	2	25,00	50,00	58,33	58,33	2,00	2,00	2,00	3,00	-0,25	3,00	0,00	0,00	0,00	4,00	4,00	2,00	4,00	0,81	3,00	3,00	3,00	-0,49	4,00	4,00	3,00	0,98	1,17
1	30	1,00	3	4,00	4	3	3	3	3	3	2	3	3	3	3	3	41,67	50,00	58,33	50,00	0,00	2,00	2,00	2,00	-0,74	4,00	0,00	0,00	0,00	3,00	3,00	3,00	3,00	-0,64	3,00	3,00	3,00	-0,49	3,00	3,00	3,00	0,30	0,55
2	65	1,00	1	4,00	4	3	3	3	4	3	2	2	2	4	4	4	41,67	41,67	75,00	25,00	0,00	3,00	3,00	2,00	0,12	3,00	0,00	0,00	1,00	3,00	4,00	3,00	4,00	0,39	4,00	3,00	4,00	0,34	2,00	2,00	2,00	-0,71	0,55
1	27	2,00	2	1,00	3	2	2	3	2	3	4	3	2	5	4	4	66,67	58,33	50,00	16,67	0,00	1,00	3,00	3,00	-0,11	2,00	0,00	0,00	1,00	2,00	4,00	3,00	4,00	0,39	4,00	3,00	1,00	-0,90	4,00	3,00	4,00	0,99	4,35
1	34	2,00	1	5,00	3	2	2	3	3	3	3	3	3	3	3	3	66,67	50,00	50,00	50,00	1,00	4,00	2,00	3,00	0,49	4,00	1,00	0,00	0,00	3,00	.	.	.	.	.	.	.	.	3,00	3,00	3,00	0,30	0,71
2	72	1,00	3	3,00	3	3	3	4	3	3	2	2	2	3	4	4	50,00	41,67	75,00	33,33	1,00	4,00	3,00	3,00	0,99	3,00	0,00	1,00	1,00	4,00	3,00	3,00	3,00	-0,64	3,00	3,00	2,00	-0,90	3,00	3,00	3,00	0,30	0,84
1	66	1,00	5	5,00	4	4	4	4	3	3	2	2	2	3	4	4	25,00	41,67	75,00	33,33	0,00	4,00	3,00	3,00	0,99	3,00	0,00	0,00	0,00	3,00	4,00	4,00	3,00	-0,51	3,00	2,00	3,00	-0,14	2,00	4,00	3,00	0,28	0,37
1	29	2,00	1	3,00	5	4	3	4	4	4	4	2	2	4	4	4	25,00	25,00	58,33	25,00	0,00	1,00	1,00	2,00	-1,61	5,00	0,00	0,00	0,00	2,00	2,00	4,00	3,00	-1,59	5,00	1,00	5,00	1,85	1,00	1,00	2,00	-1,39	2,55
2	48	3,00	1	5,00	5	5	5	4	3	3	1	1	1	2	2	2	0,00	41,67	100,00	75,00	0,00	3,00	3,00	3,00	0,62	2,00	0,00	0,00	0,00	4,00	4,00	2,00	4,00	0,81	3,00	2,00	3,00	-0,14	2,00	3,00	3,00	-0,05	0,51
2	71	2,00	2	4,00	4	3	4	3	2	2	2	2	2	4	4	3	33,33	66,67	75,00	33,33	0,00	2,00	2,00	2,00	-0,74	3,00	0,00	0,00	1,00	4,00	4,00	3,00	4,00	0,39	3,00	3,00	3,00	-0,49	2,00	4,00	2,00	-0,06	0,39
2	26	2,00	1	5,00	3	3	4	3	2	2	3	2	2	3	3	3	41,67	66,67	66,67	50,00	0,00	1,00	1,00	1,00	-2,11	5,00	1,00	0,00	0,00	2,00	4,00	2,00	3,00	0,32	4,00	3,00	4,00	0,34	2,00	2,00	3,00	-0,37	0,72
1	37	3,00	4	3,00	2	2	2	3	3	3	2	2	2	3	3	3	75,00	50,00	75,00	50,00	0,00	2,00	3,00	2,00	-0,24	3,00	0,00	0,00	1,00	3,00	4,00	1,00	4,00	1,23	3,00	2,00	3,00	-0,14	3,00	3,00	3,00	0,30	1,82
1	28	1,00	2	2,00	2	2	2	2	2	2	2	2	2	2	2	2	75,00	75,00	75,00	75,00	0,00	4,00	4,00	4,00	1,99	4,00	1,00	0,00	0,00	3,00	4,00	2,00	4,00	0,81	4,00	2,00	4,00	0,68	3,00	3,00	3,00	0,30	0,87
2	66	1,00	3	1,00	4	4	4	3	4	2	2	2	2	4	4	3	25,00	50,00	75,00	33,33	2,00	3,00	3,00	2,00	0,12	2,00	0,00	0,00	0,00	3,00	4,00	2,00	3,00	0,32	3,00	3,00	3,00	-0,49	2,00	4,00	2,00	-0,06	1,99
1	70	1,00	5	3,00	5	2	4	5	2	2	1	2	2	4	4	3	33,33	50,00	83,33	33,33	1,00	4,00	3,00	2,00	0,49	3,00	1,00	0,00	1,00	4,00	1,00	5,00	1,00	-3,53	1,00	1,00	1,00	-1,45	4,00	4,00	4,00	1,32	1,13
2	57	1,00	4	3,00	3	1	1	5	3	3	2	3	3	5	5	5	83,33	33,33	58,33	0,00	0,00	4,00	3,00	2,00	0,49	3,00	0,00	0,00	1,00	2,00	3,00	3,00	3,00	-0,64	5,00	2,00	4,00	1,10	1,00	1,00	1,00	-1,72	1,83
1	59	1,00	1	2,00	3	5	5	5	5	5	5	5	3	5	5	5	16,67	0,00	16,67	0,00	1,00	4,00	3,00	1,00	-0,01	5,00	0,00	0,00	1,00	1,00	3,00	4,00	1,00	-2,03	5,00	1,00	5,00	1,85	1,00	1,00	1,00	-1,72	1,07
1	41	3,00	2	5,00	3	3	3	3	2	2	1	2	2	4	2	3	50,00	66,67	83,33	50,00	1,00	4,00	3,00	2,00	0,49	3,00	0,00	0,00	0,00	4,00	3,00	3,00	3,00	-0,64	3,00	3,00	3,00	-0,49	2,00	4,00	3,00	0,28	0,42
1	27	1,00	4	5,00	5	5	5	2	2	2	1	1	1	3	3	4	0,00	75,00	100,00	41,67	0,00	4,00	3,00	2,00	0,49	2,00	0,00	1,00	0,00	3,00	4,00	2,00	4,00	0,81	4,00	2,00	4,00	0,68	2,00	2,00	3,00	-0,37	0,56
2	31	3,00	2	1,00	3	3	3	5	4	4	5	3	3	5	5	5	50,00	16,67	33,33	0,00	1,00	5,00	5,00	3,00	2,36	4,00	0,00	0,00	0,00	1,00	3,00	3,00	4,00	-0,15	4,00	2,00	5,00	1,09	1,00	1,00	1,00	-1,72	4,01
1	47	3,00	1	5,00	5	4	3	5	1	1	1	1	1	4	4	2	25,00	66,67	100,00	41,67	1,00	2,00	3,00	3,00	0,26	4,00	0,00	0,00	0,00	4,00	3,00	3,00	3,00	-0,64	3,00	3,00	3,00	-0,49	3,00	3,00	3,00	0,30	0,53
2	63	1,00	4	4,00	3	2	3	5	4	4	2	2	3	5	5	5	58,33	16,67	66,67	0,00	1,00	1,00	2,00	2,00	-1,11	5,00	1,00	1,00	1,00	1,00	2,00	5,00	2,00	-2,50	5,00	5,00	5,00	0,47	1,00	1,00	1,00	-1,72	0,41
2	38	3,00	3	4,00	4	2	2	4	4	4	4	4	4	5	5	5	58,33	25,00	25,00	0,00	1,00	1,00	5,00	2,00	0,39	4,00	0,00	0,00	1,00	2,00	4,00	3,00	3,00	-0,10	4,00	2,00	4,00	0,68	2,00	2,00	2,00	-0,71	0,53
1	68	1,00	3	2,00	4	3	4	4	3	4	2	2	2	5	5	4	33,33	33,33	75,00	8,33	0,00	4,00	3,00	2,00	0,49	3,00	0,00	0,00	1,00	4,00	4,00	2,00	4,00	0,81	1,00	4,00	1,00	-2,49	2,00	3,00	3,00	-0,05	0,41
1	55	2,00	4	4,00	4	4	3	4	3	2	2	2	2	4	4	3	33,33	50,00	75,00	33,33	0,00	5,00	3,00	3,00	1,35	3,00	0,00	0,00	0,00	4,00	4,00	4,00	4,00	-0,02	4,00	2,00	4,00	0,68	3,00	4,00	2,00	0,29	0,69
1	73	1,00	4	3,00	3	2	2	3	1	1	2	2	2	3	2	2	66,67	83,33	75,00	66,67	0,00	3,00	3,00	2,00	0,12	2,00	0,00	0,00	0,00	4,00	.	.	.	.	2,00	3,00	2,00	-1,31	5,00	5,00	4,00	1,99	1,05
1	71	2,00	5	5,00	4	4	4	3	3	2	2	1	1	4	4	4	25,00	58,33	91,67	25,00	0,00	1,00	2,00	3,00	-0,61	5,00	0,00	0,00	1,00	2,00	5,00	1,00	5,00	2,26	5,00	1,00	5,00	1,85	1,00	1,00	3,00	-1,05	0,33
2	74	2,00	5	1,00	3	3	3	3	3	3	3	2	2	4	3	4	50,00	50,00	66,67	33,33	0,00	4,00	3,00	4,00	1,49	3,00	0,00	0,00	0,00	3,00	3,00	3,00	3,00	-0,64	3,00	3,00	3,00	-0,49	3,00	3,00	2,00	-0,04	2,33
2	36	3,00	1	5,00	4	3	5	2	2	2	3	1	3	4	4	3	25,00	75,00	66,67	33,33	1,00	2,00	4,00	3,00	0,76	2,00	0,00	0,00	0,00	4,00	4,00	4,00	4,00	-0,02	5,00	2,00	3,00	0,68	2,00	1,00	3,00	-0,70	0,69
2	72	2,00	1	4,00	4	4	4	3	3	3	2	2	2	5	5	4	25,00	50,00	75,00	8,33	0,00	2,00	2,00	1,00	-1,24	4,00	1,00	0,00	0,00	2,00	4,00	3,00	4,00	0,39	4,00	3,00	4,00	0,34	2,00	3,00	2,00	-0,38	0,49
2	45	1,00	1	5,00	4	3	4	3	3	3	2	2	2	3	3	3	33,33	50,00	75,00	50,00	1,00	1,00	3,00	1,00	-1,11	5,00	0,00	0,00	0,00	3,00	4,00	3,00	4,00	0,39	3,00	3,00	3,00	-0,49	3,00	2,00	2,00	-0,36	0,51
1	19	3,00	3	2,00	3	3	3	2	2	2	2	2	2	2	2	2	50,00	75,00	75,00	75,00	0,00	4,00	4,00	3,00	1,49	2,00	0,00	0,00	1,00	4,00	2,00	3,00	3,00	-1,18	2,00	3,00	3,00	-0,90	4,00	4,00	4,00	1,32	0,67
2	67	1,00	3	4,00	5	5	5	1	1	1	1	1	1	2	2	2	0,00	100,00	100,00	75,00	1,00	2,00	2,00	3,00	-0,25	1,00	0,00	0,00	0,00	5,00	4,00	2,00	4,00	0,81	1,00	5,00	1,00	-2,83	4,00	5,00	4,00	1,64	0,34
1	72	2,00	4	4,00	5	5	5	3	2	2	1	1	1	4	4	2	0,00	66,67	100,00	41,67	1,00	3,00	3,00	1,00	-0,38	2,00	0,00	1,00	0,00	2,00	3,00	3,00	3,00	-0,64	3,00	3,00	3,00	-0,49	3,00	3,00	3,00	0,30	0,38
2	33	3,00	4	4,00	1	1	1	5	4	4	2	2	2	5	5	5	100,00	16,67	75,00	0,00	2,00	1,00	1,00	2,00	-1,61	4,00	1,00	0,00	1,00	2,00	3,00	2,00	4,00	0,27	5,00	1,00	5,00	1,85	1,00	1,00	1,00	-1,72	0,64
2	25	1,00	4	4,00	5	3	3	4	3	2	3	2	2	5	5	4	33,33	50,00	66,67	8,33	1,00	2,00	2,00	3,00	-0,25	3,00	0,00	0,00	0,00	2,00	4,00	2,00	4,00	0,81	3,00	2,00	3,00	-0,14	3,00	4,00	4,00	0,97	0,67
1	75	2,00	1	5,00	5	5	5	5	4	4	5	3	3	4	4	3	0,00	16,67	33,33	33,33	0,00	4,00	5,00	4,00	2,49	4,00	0,00	0,00	1,00	3,00	4,00	2,00	3,00	0,32	3,00	2,00	4,00	0,27	3,00	5,00	3,00	0,96	0,41
2	61	1,00	2	4,00	5	5	5	5	3	3	2	1	1	5	4	4	0,00	33,33	91,67	16,67	1,00	3,00	3,00	3,00	0,62	4,00	0,00	0,00	0,00	2,00	4,00	3,00	3,00	-0,10	3,00	2,00	4,00	0,27	4,00	3,00	2,00	0,31	0,44
2	53	2,00	5	1,00	3	2	3	4	3	4	2	2	2	4	4	4	58,33	33,33	75,00	25,00	2,00	2,00	3,00	3,00	0,26	3,00	0,00	0,00	0,00	3,00	3,00	3,00	3,00	-0,64	4,00	2,00	4,00	0,68	2,00	2,00	2,00	-0,71	4,21
2	60	1,00	4	1,00	4	3	3	2	2	1	2	2	2	3	2	3	41,67	83,33	75,00	58,33	0,00	2,00	2,00	2,00	-0,74	2,00	0,00	0,00	0,00	4,00	3,00	3,00	3,00	-0,64	1,00	1,00	1,00	-1,45	4,00	4,00	4,00	1,32	2,41
2	47	3,00	3	4,00	5	4	4	3	2	1	1	1	1	2	2	2	16,67	75,00	100,00	75,00	1,00	1,00	4,00	4,00	0,89	3,00	1,00	0,00	0,00	3,00	5,00	1,00	5,00	2,26	4,00	2,00	4,00	0,68	2,00	2,00	2,00	-0,71	0,39
2	26	2,00	1	2,00	3	3	3	3	3	3	3	3	3	3	3	3	50,00	50,00	50,00	50,00	0,00	4,00	3,00	3,00	0,99	2,00	0,00	0,00	0,00	3,00	3,00	3,00	3,00	-0,64	3,00	3,00	3,00	-0,49	3,00	3,00	3,00	0,30	1,05
1	70	1,00	2	5,00	5	4	4	2	2	2	2	2	2	2	2	2	16,67	75,00	75,00	75,00	1,00	4,00	3,00	2,00	0,49	4,00	0,00	0,00	1,00	2,00	2,00	4,00	2,00	-2,08	5,00	1,00	5,00	1,85	1,00	1,00	2,00	-1,39	0,33
1	29	1,00	1	5,00	4	3	3	4	3	2	2	1	2	5	5	4	41,67	50,00	83,33	8,33	0,00	2,00	3,00	1,00	-0,74	5,00	0,00	0,00	0,00	2,00	3,00	2,00	4,00	0,27	5,00	2,00	5,00	1,51	1,00	1,00	2,00	-1,39	0,75
1	30	3,00	3	4,00	3	3	3	3	3	3	3	3	3	3	3	3	50,00	50,00	50,00	50,00	1,00	4,00	4,00	3,00	1,49	4,00	0,00	0,00	0,00	3,00	3,00	3,00	3,00	-0,64	3,00	3,00	3,00	-0,49	3,00	3,00	3,00	0,30	0,55
2	63	1,00	1	4,00	4	3	3	4	3	2	2	2	3	2	4	3	41,67	50,00	66,67	50,00	0,00	1,00	3,00	1,00	-1,11	5,00	0,00	0,00	1,00	4,00	4,00	2,00	2,00	-0,17	3,00	5,00	1,00	-2,01	2,00	3,00	4,00	0,29	0,55
1	49	2,00	3	3,00	5	2	4	5	5	5	4	2	2	5	5	5	33,33	0,00	58,33	0,00	0,00	1,00	3,00	2,00	-0,61	3,00	0,00	0,00	1,00	5,00	3,00	3,00	4,00	-0,15	2,00	4,00	1,00	-2,07	5,00	5,00	4,00	1,99	1,11
2	62	1,00	3	5,00	3	3	3	4	5	3	4	3	3	5	5	5	50,00	25,00	41,67	0,00	0,00	1,00	1,00	1,00	-2,11	5,00	1,00	1,00	0,00	1,00	3,00	3,00	2,00	-1,12	5,00	1,00	5,00	1,85	1,00	1,00	3,00	-1,05	0,27
1	52	3,00	1	3,00	4	4	4	3	3	2	1	1	1	3	4	2	25,00	58,33	100,00	50,00	2,00	2,00	3,00	2,00	-0,24	3,00	0,00	0,00	1,00	4,00	3,00	3,00	3,00	-0,64	2,00	4,00	2,00	-1,66	3,00	3,00	2,00	-0,04	2,53
1	73	1,00	4	4,00	4	1	1	4	3	2	4	1	1	4	4	4	75,00	50,00	75,00	25,00	1,00	4,00	4,00	2,00	0,99	4,00	0,00	0,00	1,00	4,00	3,00	3,00	4,00	-0,15	4,00	2,00	4,00	0,68	2,00	2,00	2,00	-0,71	0,38
2	52	3,00	4	5,00	5	5	2	5	5	5	1	1	1	5	5	5	25,00	0,00	100,00	0,00	0,00	1,00	2,00	2,00	-1,11	5,00	1,00	1,00	0,00	1,00	3,00	3,00	4,00	-0,15	3,00	3,00	3,00	-0,49	1,00	1,00	1,00	-1,72	0,54
2	26	3,00	4	1,00	1	5	5	3	3	3	5	5	5	3	4	3	33,33	50,00	0,00	41,67	1,00	1,00	3,00	1,00	-1,11	1,00	0,00	0,00	0,00	3,00	3,00	3,00	3,00	-0,64	3,00	3,00	3,00	-0,49	2,00	1,00	3,00	-0,70	3,95
2	31	2,00	3	5,00	4	3	3	4	4	4	2	2	2	3	3	4	41,67	25,00	75,00	41,67	0,00	1,00	3,00	2,00	-0,61	4,00	0,00	0,00	0,00	2,00	4,00	2,00	3,00	0,32	4,00	2,00	4,00	0,68	2,00	2,00	2,00	-0,71	0,43
2	70	1,00	5	1,00	4	4	4	5	5	5	4	4	4	5	5	5	25,00	0,00	25,00	0,00	1,00	3,00	3,00	2,00	0,12	3,00	0,00	0,00	0,00	2,00	3,00	3,00	3,00	-0,64	3,00	3,00	4,00	-0,08	2,00	2,00	2,00	-0,71	2,33
1	49	2,00	1	5,00	5	4	5	3	1	2	1	1	1	1	1	2	8,33	75,00	100,00	91,67	0,00	4,00	2,00	2,00	-0,01	1,00	0,00	0,00	1,00	4,00	3,00	2,00	3,00	-0,22	3,00	3,00	2,00	-0,90	5,00	5,00	4,00	1,99	0,53
1	72	1,00	3	3,00	4	4	3	4	2	3	2	2	1	4	4	3	33,33	50,00	83,33	33,33	1,00	4,00	3,00	1,00	-0,01	5,00	0,00	0,00	0,00	4,00	.	.	.	.	4,00	2,00	4,00	0,68	2,00	3,00	2,00	-0,38	0,87
2	64	1,00	4	4,00	1	1	1	5	5	3	4	2	2	5	4	3	100,00	16,67	58,33	25,00	0,00	3,00	2,00	4,00	0,62	4,00	0,00	0,00	0,00	2,00	2,00	3,00	3,00	-1,18	3,00	3,00	2,00	-0,90	2,00	2,00	1,00	-1,05	0,41
2	34	2,00	1	5,00	5	4	4	3	2	2	2	2	2	3	3	2	16,67	66,67	75,00	58,33	1,00	3,00	3,00	3,00	0,62	2,00	0,00	0,00	0,00	4,00	3,00	2,00	3,00	-0,22	5,00	2,00	4,00	1,10	3,00	2,00	4,00	0,31	0,69
2	27	2,00	2	3,00	3	1	2	5	4	4	3	3	3	4	4	4	75,00	16,67	50,00	25,00	0,00	3,00	2,00	2,00	-0,38	3,00	0,00	0,00	0,00	3,00	4,00	3,00	3,00	-0,10	4,00	2,00	4,00	0,68	3,00	3,00	3,00	0,30	1,97
1	46	3,00	4	3,00	4	2	3	3	3	3	3	3	2	4	4	3	50,00	50,00	58,33	33,33	0,00	2,00	2,00	2,00	-0,74	3,00	0,00	0,00	0,00	3,00	3,00	3,00	4,00	-0,15	3,00	3,00	4,00	-0,08	3,00	2,00	2,00	-0,36	1,34
1	65	1,00	5	4,00	4	4	4	2	1	1	1	2	2	1	1	2	25,00	91,67	83,33	91,67	0,00	2,00	3,00	2,00	-0,24	2,00	0,00	0,00	0,00	4,00	3,00	2,00	3,00	-0,22	3,00	3,00	3,00	-0,49	4,00	4,00	4,00	1,32	0,46
1	44	3,00	1	4,00	5	4	4	4	2	2	2	1	1	2	2	2	16,67	58,33	91,67	75,00	0,00	3,00	3,00	2,00	0,12	4,00	0,00	0,00	0,00	3,00	4,00	2,00	4,00	0,81	3,00	2,00	4,00	0,27	2,00	4,00	3,00	0,28	0,65
1	41	3,00	1	3,00	4	3	4	3	2	3	2	2	2	3	3	3	33,33	58,33	75,00	50,00	1,00	3,00	3,00	3,00	0,62	2,00	0,00	0,00	0,00	4,00	4,00	1,00	4,00	1,23	4,00	2,00	4,00	0,68	3,00	3,00	3,00	0,30	1,79
1	31	1,00	5	2,00	2	3	3	4	4	2	3	2	3	2	2	3	58,33	41,67	58,33	66,67	0,00	2,00	2,00	3,00	-0,25	4,00	1,00	0,00	0,00	2,00	3,00	3,00	4,00	-0,15	3,00	3,00	4,00	-0,08	3,00	2,00	2,00	-0,36	0,83
2	47	1,00	1	3,00	3	3	2	5	3	4	5	4	3	5	5	5	58,33	25,00	25,00	0,00	0,00	4,00	4,00	2,00	0,99	3,00	0,00	1,00	0,00	2,00	3,00	3,00	3,00	-0,64	4,00	3,00	4,00	0,34	3,00	3,00	2,00	-0,04	1,73
1	66	1,00	2	4,00	4	3	3	3	3	2	2	2	2	4	4	4	41,67	58,33	75,00	25,00	0,00	4,00	4,00	2,00	0,99	4,00	0,00	1,00	1,00	3,00	3,00	3,00	3,00	-0,64	3,00	3,00	3,00	-0,49	3,00	3,00	3,00	0,30	0,45
1	63	2,00	1	3,00	4	4	4	4	4	4	3	1	1	4	4	4	25,00	25,00	83,33	25,00	0,00	4,00	4,00	2,00	0,99	4,00	0,00	0,00	1,00	4,00	4,00	2,00	3,00	0,32	3,00	3,00	3,00	-0,49	2,00	2,00	2,00	-0,71	1,56
1	73	1,00	3	5,00	5	5	5	1	1	1	1	1	1	2	3	1	0,00	100,00	100,00	75,00	0,00	2,00	2,00	2,00	-0,74	3,00	0,00	0,00	0,00	5,00	5,00	1,00	5,00	2,26	1,00	5,00	3,00	-2,01	5,00	5,00	5,00	2,33	0,25
1	50	2,00	5	3,00	3	3	2	5	5	5	3	4	3	5	5	5	58,33	0,00	41,67	0,00	0,00	5,00	2,00	2,00	0,35	4,00	1,00	0,00	0,00	3,00	3,00	3,00	3,00	-0,64	3,00	2,00	3,00	-0,14	3,00	3,00	3,00	0,30	2,04
2	59	2,00	3	4,00	4	3	4	3	2	2	3	2	2	3	3	3	33,33	66,67	66,67	50,00	0,00	2,00	2,00	2,00	-0,74	3,00	0,00	0,00	1,00	3,00	3,00	3,00	3,00	-0,64	3,00	3,00	3,00	-0,49	3,00	4,00	4,00	0,97	0,55
2	19	2,00	2	1,00	5	5	5	5	5	5	5	5	5	5	5	5	0,00	0,00	0,00	0,00	0,00	1,00	1,00	1,00	-2,11	1,00	0,00	0,00	0,00	1,00	.	.	.	.	.	.	.	.	1,00	1,00	1,00	-1,72	4,21
2	26	2,00	1	5,00	3	2	2	5	4	2	2	2	2	4	4	4	66,67	33,33	75,00	25,00	0,00	2,00	2,00	3,00	-0,25	2,00	0,00	0,00	0,00	3,00	4,00	2,00	4,00	0,81	4,00	4,00	4,00	-0,01	2,00	2,00	3,00	-0,37	0,72
1	40	1,00	1	4,00	5	3	4	3	1	1	1	1	1	1	1	1	25,00	83,33	100,00	100,00	1,00	4,00	2,00	2,00	-0,01	2,00	0,00	0,00	0,00	4,00	4,00	2,00	4,00	0,81	4,00	2,00	4,00	0,68	4,00	4,00	2,00	0,64	0,65
2	66	1,00	2	1,00	3	2	2	4	4	4	2	2	2	4	4	4	66,67	25,00	75,00	25,00	0,00	1,00	2,00	2,00	-1,11	5,00	0,00	0,00	1,00	2,00	3,00	3,00	3,00	-0,64	4,00	2,00	4,00	0,68	1,00	2,00	2,00	-1,06	2,57
2	57	2,00	1	4,00	5	5	4	5	2	1	2	1	1	4	4	3	8,33	58,33	91,67	33,33	0,00	3,00	3,00	2,00	0,12	2,00	0,00	0,00	0,00	2,00	3,00	3,00	3,00	-0,64	5,00	1,00	4,00	1,44	4,00	2,00	3,00	0,32	0,89
1	74	1,00	4	5,00	5	3	2	4	4	2	1	1	2	4	4	2	41,67	41,67	91,67	41,67	1,00	3,00	2,00	2,00	-0,38	2,00	0,00	0,00	0,00	4,00	3,00	3,00	3,00	-0,64	4,00	3,00	3,00	-0,08	2,00	4,00	3,00	0,28	0,31
1	42	1,00	4	4,00	4	3	2	2	3	3	3	2	2	3	3	2	50,00	58,33	66,67	58,33	0,00	4,00	3,00	3,00	0,99	4,00	0,00	1,00	0,00	4,00	5,00	3,00	4,00	0,93	4,00	3,00	4,00	0,34	2,00	2,00	2,00	-0,71	0,49
1	71	1,00	2	3,00	4	2	3	4	2	2	2	2	2	3	2	3	50,00	58,33	75,00	58,33	0,00	4,00	3,00	3,00	0,99	.	0,00	0,00	0,00	2,00	4,00	2,00	2,00	-0,17	3,00	4,00	3,00	-0,84	3,00	2,00	2,00	-0,36	1,12
1	59	3,00	1	3,00	4	4	2	4	4	2	4	4	4	4	4	4	41,67	41,67	25,00	25,00	0,00	4,00	1,00	3,00	-0,02	5,00	1,00	1,00	0,00	1,00	3,00	4,00	2,00	-1,54	5,00	1,00	5,00	1,85	1,00	1,00	2,00	-1,39	2,53
2	61	2,00	4	4,00	3	2	3	3	2	2	2	2	2	2	3	2	58,33	66,67	75,00	66,67	0,00	1,00	2,00	2,00	-1,11	3,00	1,00	0,00	0,00	3,00	4,00	3,00	3,00	-0,10	4,00	3,00	4,00	0,34	3,00	3,00	3,00	0,30	0,41
1	75	1,00	4	4,00	3	3	3	3	1	1	1	1	1	3	3	2	50,00	83,33	100,00	58,33	0,00	4,00	4,00	1,00	0,49	3,00	0,00	0,00	0,00	4,00	3,00	2,00	3,00	-0,22	3,00	4,00	3,00	-0,84	4,00	5,00	3,00	1,30	0,38
1	66	2,00	1	3,00	5	4	4	3	4	4	1	1	2	2	2	2	16,67	33,33	91,67	75,00	0,00	4,00	4,00	2,00	0,99	1,00	0,00	0,00	0,00	4,00	3,00	2,00	3,00	-0,22	2,00	4,00	1,00	-2,07	5,00	5,00	3,00	1,65	1,56
1	73	1,00	3	1,00	5	1	1	2	2	3	1	1	1	4	4	2	66,67	66,67	100,00	41,67	1,00	4,00	3,00	2,00	0,49	3,00	0,00	0,00	0,00	4,00	5,00	2,00	5,00	1,84	3,00	4,00	3,00	-0,84	5,00	5,00	2,00	1,31	1,85
2	29	3,00	5	3,00	3	2	1	5	5	4	2	3	2	5	5	5	75,00	8,33	66,67	0,00	0,00	2,00	3,00	3,00	0,26	3,00	0,00	0,00	1,00	2,00	3,00	2,00	2,00	-0,71	4,00	2,00	4,00	0,68	1,00	1,00	1,00	-1,72	1,99
1	74	2,00	4	5,00	3	1	1	5	5	5	3	3	3	5	5	5	83,33	0,00	50,00	0,00	0,00	3,00	2,00	2,00	-0,38	3,00	0,00	0,00	0,00	5,00	3,00	3,00	3,00	-0,64	3,00	3,00	3,00	-0,49	5,00	5,00	1,00	0,97	0,31
1	47	3,00	1	4,00	2	2	3	3	3	3	3	3	3	3	3	3	66,67	50,00	50,00	50,00	1,00	2,00	2,00	2,00	-0,74	4,00	1,00	0,00	0,00	2,00	4,00	3,00	4,00	0,39	3,00	3,00	3,00	-0,49	2,00	2,00	2,00	-0,71	0,65
1	66	1,00	1	5,00	5	5	5	3	2	2	1	1	1	3	2	2	0,00	66,67	100,00	66,67	0,00	2,00	3,00	2,00	-0,24	2,00	0,00	0,00	0,00	5,00	5,00	1,00	4,00	1,77	2,00	4,00	1,00	-2,07	4,00	5,00	4,00	1,64	0,46
2	67	1,00	3	4,00	5	5	5	3	1	1	1	1	1	3	4	1	0,00	83,33	100,00	58,33	0,00	3,00	4,00	1,00	0,12	3,00	0,00	1,00	1,00	4,00	4,00	4,00	3,00	-0,51	3,00	3,00	3,00	-0,49	4,00	4,00	5,00	1,65	0,34
2	62	3,00	5	4,00	2	2	3	4	2	1	4	4	4	5	5	4	66,67	66,67	25,00	8,33	1,00	2,00	2,00	3,00	-0,25	4,00	0,00	0,00	1,00	3,00	4,00	2,00	4,00	0,81	3,00	3,00	3,00	-0,49	2,00	2,00	3,00	-0,37	0,44
1	71	1,00	3	1,00	4	2	2	3	2	2	1	2	2	2	2	2	58,33	66,67	83,33	75,00	0,00	3,00	3,00	2,00	0,12	3,00	0,00	0,00	0,00	4,00	4,00	2,00	4,00	0,81	4,00	2,00	4,00	0,68	3,00	3,00	4,00	0,64	1,85
2	37	3,00	2	1,00	1	1	1	3	3	3	5	1	5	3	3	3	100,00	50,00	33,33	50,00	0,00	4,00	3,00	2,00	0,49	3,00	0,00	0,00	0,00	3,00	3,00	3,00	3,00	-0,64	3,00	3,00	3,00	-0,49	3,00	3,00	3,00	0,30	4,01
1	49	3,00	3	4,00	4	4	4	3	1	2	2	2	2	3	3	3	25,00	75,00	75,00	50,00	1,00	1,00	2,00	3,00	-0,61	3,00	0,00	0,00	0,00	3,00	4,00	2,00	4,00	0,81	4,00	2,00	2,00	-0,14	3,00	4,00	2,00	0,29	0,40
2	73	2,00	1	4,00	5	4	4	3	2	2	1	1	1	3	4	3	16,67	66,67	100,00	41,67	2,00	2,00	2,00	2,00	-0,74	3,00	0,00	0,00	0,00	5,00	4,00	4,00	4,00	-0,02	4,00	4,00	4,00	-0,01	3,00	4,00	3,00	0,63	0,49
1	67	1,00	1	4,00	3	2	4	4	5	3	2	2	2	5	4	4	50,00	25,00	75,00	16,67	2,00	2,00	3,00	1,00	-0,74	3,00	0,00	0,00	1,00	3,00	3,00	2,00	3,00	-0,22	4,00	3,00	4,00	0,34	2,00	2,00	2,00	-0,71	0,57
2	19	2,00	3	2,00	4	5	5	3	3	2	2	1	1	4	4	4	8,33	58,33	91,67	25,00	0,00	4,00	2,00	2,00	-0,01	1,00	0,00	0,00	0,00	2,00	2,00	3,00	3,00	-1,18	3,00	3,00	3,00	-0,49	4,00	4,00	3,00	0,98	0,65
1	37	3,00	3	5,00	2	3	3	3	2	3	1	3	2	2	3	2	58,33	58,33	75,00	66,67	3,00	1,00	3,00	4,00	0,39	4,00	1,00	1,00	1,00	5,00	4,00	4,00	4,00	-0,02	.	.	.	.	5,00	4,00	5,00	2,00	0,44
1	71	1,00	1	4,00	5	5	5	5	5	5	4	5	4	5	5	5	0,00	0,00	16,67	0,00	2,00	3,00	2,00	2,00	-0,38	5,00	0,00	0,00	0,00	1,00	4,00	2,00	4,00	0,81	4,00	2,00	4,00	0,68	1,00	1,00	1,00	-1,72	0,51
2	61	1,00	4	4,00	4	4	4	4	2	2	1	3	4	3	3	3	25,00	58,33	58,33	50,00	0,00	4,00	2,00	2,00	-0,01	4,00	0,00	0,00	0,00	5,00	4,00	2,00	4,00	0,81	3,00	2,00	3,00	-0,14	2,00	3,00	3,00	-0,05	0,41
1	63	1,00	1	5,00	4	4	4	5	2	3	1	2	2	3	3	3	25,00	41,67	83,33	50,00	0,00	3,00	2,00	2,00	-0,38	1,00	0,00	0,00	0,00	4,00	2,00	3,00	2,00	-1,67	2,00	4,00	2,00	-1,66	4,00	5,00	4,00	1,64	0,46
1	22	1,00	4	2,00	5	4	5	5	3	3	2	1	1	4	5	4	8,33	33,33	91,67	16,67	1,00	3,00	3,00	3,00	0,62	3,00	0,00	0,00	0,00	2,00	4,00	2,00	4,00	0,81	4,00	2,00	4,00	0,68	3,00	3,00	4,00	0,64	0,81
1	62	1,00	3	2,00	4	5	4	3	1	1	3	1	1	4	4	2	16,67	83,33	83,33	41,67	1,00	4,00	2,00	2,00	-0,01	4,00	0,00	0,00	0,00	4,00	4,00	1,00	4,00	1,23	4,00	2,00	4,00	0,68	1,00	2,00	3,00	-0,72	0,41
1	26	2,00	1	2,00	2	1	4	2	1	2	1	1	1	2	2	2	66,67	83,33	100,00	75,00	1,00	2,00	3,00	3,00	0,26	2,00	0,00	0,00	0,00	4,00	4,00	4,00	4,00	-0,02	3,00	4,00	4,00	-0,42	4,00	5,00	4,00	1,64	1,08
2	41	1,00	1	5,00	3	3	3	5	3	3	2	2	2	3	3	3	50,00	33,33	75,00	50,00	0,00	4,00	2,00	2,00	-0,01	1,00	0,00	0,00	0,00	2,00	3,00	3,00	3,00	-0,64	4,00	3,00	2,00	-0,49	3,00	3,00	4,00	0,64	0,51
2	64	1,00	4	2,00	3	2	2	5	5	5	2	3	1	5	5	4	66,67	0,00	75,00	8,33	0,00	2,00	3,00	3,00	0,26	4,00	0,00	0,00	0,00	3,00	3,00	3,00	3,00	-0,64	3,00	3,00	3,00	-0,49	2,00	4,00	1,00	-0,40	0,48
2	41	2,00	2	5,00	4	4	3	5	4	1	2	2	2	4	4	5	33,33	41,67	75,00	16,67	0,00	3,00	3,00	3,00	0,62	3,00	0,00	0,00	1,00	4,00	4,00	2,00	4,00	0,81	3,00	3,00	3,00	-0,49	2,00	2,00	2,00	-0,71	0,41
2	21	3,00	1	2,00	1	1	1	5	5	2	5	5	5	5	5	5	100,00	25,00	0,00	0,00	0,00	1,00	1,00	1,00	-2,11	.	0,00	0,00	1,00	1,00	1,00	5,00	1,00	-3,53	4,00	1,00	5,00	1,44	1,00	1,00	1,00	-1,72	1,05
1	32	2,00	1	3,00	5	4	4	3	2	3	2	2	2	3	3	4	16,67	58,33	75,00	41,67	0,00	4,00	1,00	2,00	-0,52	3,00	0,00	0,00	0,00	3,00	4,00	3,00	4,00	0,39	4,00	2,00	4,00	0,68	2,00	2,00	3,00	-0,37	2,42
2	71	2,00	1	4,00	4	1	2	5	4	2	3	3	2	5	5	5	66,67	33,33	58,33	0,00	0,00	3,00	2,00	2,00	-0,38	4,00	0,00	0,00	1,00	2,00	3,00	4,00	2,00	-1,54	4,00	2,00	5,00	1,09	1,00	2,00	2,00	-1,06	0,49
2	22	2,00	4	2,00	4	2	2	3	3	4	2	2	2	2	2	2	58,33	41,67	75,00	75,00	0,00	3,00	2,00	3,00	0,12	4,00	0,00	0,00	0,00	2,00	4,00	2,00	4,00	0,81	4,00	2,00	4,00	0,68	2,00	2,00	3,00	-0,37	0,79
1	62	3,00	1	5,00	4	4	4	2	2	3	2	2	2	4	4	3	25,00	66,67	75,00	33,33	0,00	2,00	3,00	3,00	0,26	4,00	0,00	0,00	0,00	2,00	4,00	2,00	4,00	0,81	4,00	2,00	4,00	0,68	2,00	2,00	4,00	-0,03	0,46
1	60	3,00	4	3,00	4	4	2	3	1	2	1	2	1	2	2	1	41,67	75,00	91,67	83,33	0,00	3,00	4,00	2,00	0,62	2,00	0,00	0,00	0,00	5,00	3,00	3,00	3,00	-0,64	2,00	3,00	2,00	-1,31	5,00	5,00	3,00	1,65	1,17
1	32	3,00	3	5,00	4	2	3	5	5	4	2	1	2	5	4	4	50,00	8,33	83,33	16,67	1,00	2,00	1,00	2,00	-1,25	3,00	0,00	0,00	0,00	2,00	3,00	3,00	3,00	-0,64	4,00	2,00	3,00	0,27	3,00	3,00	2,00	-0,04	0,44
2	40	3,00	4	3,00	3	3	3	3	3	3	3	3	3	3	3	3	50,00	50,00	50,00	50,00	0,00	3,00	2,00	2,00	-0,38	3,00	0,00	1,00	0,00	3,00	.	.	.	.	.	.	.	.	3,00	3,00	3,00	0,30	1,30
1	73	1,00	1	4,00	4	3	3	5	2	2	4	2	3	4	4	2	41,67	50,00	50,00	41,67	0,00	2,00	2,00	3,00	-0,25	3,00	0,00	0,00	0,00	2,00	3,00	2,00	2,00	-0,71	2,00	2,00	3,00	-0,56	2,00	2,00	2,00	-0,71	0,51
2	66	1,00	1	3,00	2	2	2	5	5	5	2	2	2	5	5	4	75,00	0,00	75,00	8,33	1,00	2,00	2,00	3,00	-0,25	4,00	0,00	1,00	1,00	2,00	4,00	2,00	4,00	0,81	3,00	3,00	3,00	-0,49	1,00	1,00	1,00	-1,72	1,51
2	37	3,00	4	3,00	4	4	4	5	4	4	1	1	1	4	4	4	25,00	16,67	100,00	25,00	0,00	3,00	3,00	2,00	0,12	3,00	0,00	0,00	0,00	1,00	4,00	2,00	4,00	0,81	4,00	2,00	4,00	0,68	1,00	1,00	1,00	-1,72	1,76
1	34	3,00	3	4,00	2	2	3	2	1	2	2	2	2	2	1	2	66,67	83,33	75,00	83,33	2,00	4,00	2,00	2,00	-0,01	.	0,00	0,00	0,00	5,00	4,00	4,00	4,00	-0,02	4,00	4,00	4,00	-0,01	5,00	4,00	5,00	2,00	0,55
2	29	2,00	3	3,00	4	3	3	4	3	3	1	1	1	3	4	4	41,67	41,67	100,00	33,33	2,00	5,00	2,00	4,00	1,35	2,00	0,00	0,00	0,00	5,00	5,00	2,00	4,00	1,35	2,00	2,00	2,00	-0,97	3,00	4,00	2,00	0,29	1,53
1	46	3,00	4	4,00	4	3	4	1	1	1	2	1	2	3	1	1	33,33	100,00	83,33	83,33	0,00	4,00	4,00	4,00	1,99	1,00	0,00	0,00	0,00	5,00	.	.	.	.	.	.	.	.	5,00	5,00	5,00	2,33	0,49
1	63	1,00	1	3,00	5	4	4	5	2	3	1	1	1	5	5	5	16,67	41,67	100,00	0,00	1,00	3,00	4,00	1,00	0,12	3,00	0,00	0,00	0,00	3,00	3,00	3,00	3,00	-0,64	3,00	3,00	3,00	-0,49	3,00	2,00	2,00	-0,36	1,56
2	45	3,00	1	3,00	3	3	1	3	5	5	5	1	2	5	5	5	66,67	16,67	58,33	0,00	0,00	1,00	2,00	2,00	-1,11	4,00	0,00	0,00	0,00	1,00	4,00	3,00	2,00	-0,58	5,00	1,00	4,00	1,44	1,00	2,00	2,00	-1,06	1,73
2	67	2,00	4	5,00	5	4	4	4	2	2	1	1	1	4	4	2	16,67	58,33	100,00	41,67	1,00	4,00	3,00	3,00	0,99	2,00	0,00	0,00	0,00	4,00	3,00	3,00	3,00	-0,64	3,00	3,00	3,00	-0,49	2,00	2,00	2,00	-0,71	0,33
1	22	2,00	5	2,00	2	3	3	4	3	3	4	4	3	4	4	4	58,33	41,67	33,33	25,00	0,00	4,00	2,00	3,00	0,49	4,00	0,00	0,00	0,00	3,00	.	.	.	.	.	.	.	.	3,00	3,00	3,00	0,30	0,87
2	45	2,00	4	3,00	3	3	3	4	4	4	2	2	2	4	4	5	50,00	25,00	75,00	16,67	0,00	4,00	2,00	1,00	-0,51	2,00	0,00	0,00	0,00	2,00	4,00	3,00	3,00	-0,10	4,00	2,00	4,00	0,68	1,00	3,00	2,00	-0,73	1,30
2	32	3,00	2	4,00	1	1	1	5	5	4	4	3	2	5	5	5	100,00	8,33	50,00	0,00	1,00	2,00	1,00	2,00	-1,25	5,00	1,00	1,00	0,00	1,00	4,00	1,00	4,00	1,23	4,00	2,00	4,00	0,68	1,00	1,00	1,00	-1,72	0,68
2	50	3,00	4	4,00	5	5	4	3	2	1	1	1	2	3	3	3	8,33	75,00	91,67	50,00	1,00	3,00	3,00	3,00	0,62	3,00	0,00	0,00	0,00	5,00	4,00	3,00	3,00	-0,10	1,00	5,00	2,00	-2,42	4,00	5,00	2,00	0,97	0,67
1	32	3,00	1	2,00	3	3	2	3	4	3	3	3	3	3	5	3	58,33	41,67	50,00	33,33	1,00	2,00	4,00	4,00	1,26	1,00	0,00	0,00	0,00	3,00	.	.	.	.	.	.	.	.	2,00	3,00	4,00	0,29	1,03
2	57	3,00	5	3,00	1	1	1	5	5	5	5	5	5	5	5	5	100,00	0,00	0,00	0,00	0,00	4,00	4,00	4,00	1,99	3,00	0,00	0,00	1,00	3,00	4,00	1,00	3,00	0,74	5,00	3,00	5,00	1,16	1,00	1,00	1,00	-1,72	1,97
2	25	3,00	1	2,00	3	3	2	3	3	2	2	2	2	4	4	3	58,33	58,33	75,00	33,33	0,00	3,00	4,00	4,00	1,62	1,00	0,00	0,00	0,00	4,00	3,00	3,00	4,00	-0,15	3,00	3,00	4,00	-0,08	3,00	4,00	4,00	0,97	1,05
2	74	2,00	1	4,00	4	3	3	5	3	3	4	4	2	4	4	3	41,67	33,33	41,67	33,33	0,00	1,00	2,00	2,00	-1,11	3,00	0,00	1,00	0,00	2,00	4,00	3,00	3,00	-0,10	4,00	3,00	3,00	-0,08	2,00	2,00	2,00	-0,71	0,49
2	43	3,00	4	4,00	2	3	1	5	4	3	4	4	2	4	4	4	75,00	25,00	41,67	25,00	0,00	1,00	1,00	1,00	-2,11	4,00	1,00	0,00	1,00	1,00	5,00	1,00	5,00	2,26	4,00	2,00	4,00	0,68	1,00	1,00	1,00	-1,72	0,47
2	59	1,00	3	3,00	4	3	3	4	2	2	1	1	1	4	2	2	41,67	58,33	100,00	58,33	1,00	2,00	1,00	2,00	-1,25	3,00	0,00	1,00	0,00	2,00	1,00	5,00	2,00	-3,04	1,00	4,00	1,00	-2,49	2,00	2,00	2,00	-0,71	1,52
1	26	2,00	4	4,00	3	3	3	3	3	3	2	3	3	3	3	3	50,00	50,00	58,33	50,00	0,00	1,00	3,00	3,00	-0,11	3,00	0,00	1,00	1,00	3,00	3,00	3,00	3,00	-0,64	3,00	3,00	3,00	-0,49	4,00	3,00	3,00	0,65	0,69
2	67	1,00	4	4,00	4	4	4	3	1	1	1	1	1	4	4	2	25,00	83,33	100,00	41,67	1,00	2,00	3,00	3,00	0,26	1,00	0,00	0,00	0,00	5,00	4,00	2,00	4,00	0,81	2,00	3,00	1,00	-1,73	5,00	5,00	5,00	2,33	0,41
2	34	3,00	5	4,00	5	4	4	1	3	2	1	2	2	2	2	4	16,67	75,00	83,33	58,33	2,00	2,00	3,00	2,00	-0,24	4,00	0,00	0,00	0,00	2,00	4,00	2,00	4,00	0,81	4,00	2,00	4,00	0,68	2,00	3,00	3,00	-0,05	0,69
2	36	3,00	1	4,00	4	3	4	3	2	2	2	2	2	4	4	3	33,33	66,67	75,00	33,33	1,00	2,00	3,00	2,00	-0,24	2,00	0,00	0,00	0,00	2,00	3,00	2,00	3,00	-0,22	4,00	2,00	4,00	0,68	2,00	2,00	3,00	-0,37	0,85
2	49	3,00	1	4,00	4	4	4	4	3	3	2	2	2	3	3	4	25,00	41,67	75,00	41,67	0,00	1,00	3,00	2,00	-0,61	4,00	0,00	0,00	0,00	3,00	3,00	3,00	3,00	-0,64	4,00	1,00	4,00	1,03	2,00	2,00	2,00	-0,71	0,63
2	40	2,00	1	5,00	5	5	5	3	3	2	1	1	1	2	2	2	0,00	58,33	100,00	75,00	0,00	1,00	3,00	3,00	-0,11	4,00	0,00	0,00	1,00	2,00	3,00	3,00	3,00	-0,64	3,00	3,00	4,00	-0,08	3,00	4,00	2,00	0,29	0,51
2	34	3,00	1	3,00	2	3	3	4	2	2	2	2	2	3	3	3	58,33	58,33	75,00	50,00	0,00	1,00	2,00	2,00	-1,11	4,00	0,00	0,00	0,00	4,00	4,00	2,00	4,00	0,81	3,00	3,00	3,00	-0,49	2,00	3,00	3,00	-0,05	2,34
2	47	2,00	4	4,00	4	3	4	5	3	3	2	2	2	2	4	3	33,33	33,33	75,00	50,00	1,00	2,00	4,00	3,00	0,76	4,00	0,00	0,00	0,00	2,00	4,00	3,00	3,00	-0,10	3,00	3,00	4,00	-0,08	3,00	4,00	3,00	0,63	0,47
1	69	1,00	3	3,00	4	4	4	4	3	3	4	2	3	4	4	3	25,00	41,67	50,00	33,33	0,00	3,00	3,00	1,00	-0,38	3,00	0,00	1,00	0,00	3,00	4,00	4,00	4,00	-0,02	3,00	3,00	3,00	-0,49	2,00	3,00	2,00	-0,38	0,96
1	61	1,00	3	4,00	4	3	2	4	4	4	2	2	2	4	4	4	50,00	25,00	75,00	25,00	0,00	4,00	2,00	2,00	-0,01	3,00	0,00	0,00	0,00	4,00	4,00	2,00	4,00	0,81	4,00	2,00	4,00	0,68	2,00	2,00	2,00	-0,71	0,35
2	68	1,00	1	4,00	4	4	4	3	2	2	2	2	2	3	3	3	25,00	66,67	75,00	50,00	1,00	3,00	2,00	2,00	-0,38	4,00	0,00	0,00	0,00	4,00	4,00	2,00	3,00	0,32	4,00	2,00	4,00	0,68	2,00	2,00	2,00	-0,71	0,55
1	35	2,00	4	5,00	5	4	4	5	3	3	2	2	2	4	4	2	16,67	33,33	75,00	41,67	0,00	5,00	4,00	2,00	1,36	3,00	0,00	0,00	0,00	4,00	4,00	2,00	4,00	0,81	3,00	4,00	2,00	-1,25	2,00	2,00	3,00	-0,37	0,53
2	20	2,00	4	2,00	4	2	3	4	4	4	2	2	3	2	2	3	50,00	25,00	66,67	66,67	1,00	1,00	1,00	1,00	-2,11	5,00	1,00	0,00	0,00	2,00	4,00	2,00	3,00	0,32	5,00	1,00	4,00	1,44	2,00	1,00	2,00	-1,04	0,79
2	52	3,00	1	3,00	3	3	3	4	4	3	2	2	2	5	4	3	50,00	33,33	75,00	25,00	0,00	3,00	4,00	2,00	0,62	3,00	0,00	0,00	0,00	3,00	3,00	2,00	4,00	0,27	3,00	3,00	3,00	-0,49	2,00	2,00	3,00	-0,37	2,45
1	32	3,00	1	4,00	3	3	3	5	5	4	2	2	2	4	4	5	50,00	8,33	75,00	16,67	3,00	4,00	3,00	2,00	0,49	3,00	0,00	0,00	0,00	2,00	4,00	2,00	4,00	0,81	4,00	3,00	4,00	0,34	2,00	3,00	2,00	-0,38	0,88
2	68	1,00	4	4,00	3	3	2	3	2	2	2	2	2	2	3	2	58,33	66,67	75,00	66,67	0,00	2,00	3,00	2,00	-0,24	4,00	1,00	0,00	0,00	3,00	3,00	2,00	3,00	-0,22	4,00	2,00	3,00	0,27	2,00	3,00	2,00	-0,38	0,41
2	41	3,00	3	3,00	3	3	3	4	3	3	2	2	2	4	4	4	50,00	41,67	75,00	25,00	1,00	1,00	1,00	1,00	-2,11	3,00	1,00	0,00	0,00	3,00	3,00	3,00	3,00	-0,64	3,00	3,00	3,00	-0,49	3,00	2,00	2,00	-0,36	1,07
2	71	2,00	1	5,00	3	3	3	3	2	2	2	2	3	3	3	3	50,00	66,67	66,67	50,00	0,00	1,00	1,00	2,00	-1,61	4,00	0,00	0,00	0,00	3,00	3,00	3,00	3,00	-0,64	3,00	3,00	2,00	-0,90	3,00	3,00	3,00	0,30	0,40
1	74	1,00	5	5,00	5	5	5	5	3	1	1	1	2	3	3	2	0,00	50,00	91,67	58,33	0,00	4,00	4,00	1,00	0,49	3,00	0,00	0,00	0,00	3,00	3,00	3,00	2,00	-1,12	4,00	2,00	4,00	0,68	3,00	3,00	3,00	0,30	0,33
2	71	1,00	1	3,00	3	2	2	3	3	3	2	2	2	3	3	3	66,67	50,00	75,00	50,00	0,00	1,00	1,00	1,00	-2,11	3,00	1,00	0,00	0,00	2,00	4,00	2,00	5,00	1,30	4,00	2,00	4,00	0,68	2,00	2,00	2,00	-0,71	1,35
1	74	1,00	4	5,00	5	4	4	3	2	3	1	1	1	3	2	2	16,67	58,33	100,00	66,67	0,00	2,00	2,00	3,00	-0,25	3,00	0,00	0,00	0,00	4,00	4,00	2,00	3,00	0,32	3,00	4,00	3,00	-0,84	3,00	3,00	3,00	0,30	0,31
2	51	3,00	4	4,00	4	4	4	3	1	1	1	1	1	1	1	1	25,00	83,33	100,00	100,00	0,00	1,00	4,00	2,00	-0,11	4,00	0,00	0,00	0,00	3,00	.	.	.	.	.	.	.	.	3,00	4,00	4,00	0,97	0,67
1	69	1,00	3	5,00	5	5	5	5	1	1	1	1	1	1	2	2	0,00	66,67	100,00	83,33	1,00	3,00	2,00	2,00	-0,38	4,00	0,00	0,00	0,00	2,00	4,00	3,00	3,00	-0,10	4,00	2,00	4,00	0,68	3,00	2,00	2,00	-0,36	0,28
1	39	3,00	3	2,00	3	3	2	4	3	3	3	3	3	4	4	4	58,33	41,67	50,00	25,00	0,00	2,00	2,00	2,00	-0,74	2,00	0,00	0,00	0,00	3,00	3,00	3,00	4,00	-0,15	3,00	2,00	3,00	-0,14	3,00	4,00	3,00	0,63	0,64
1	34	3,00	2	3,00	5	5	5	3	1	1	1	1	1	1	1	1	0,00	83,33	100,00	100,00	2,00	4,00	4,00	2,00	0,99	1,00	0,00	1,00	1,00	5,00	4,00	2,00	4,00	0,81	2,00	3,00	3,00	-0,90	5,00	5,00	5,00	2,33	1,94
2	68	2,00	3	4,00	4	3	3	5	3	2	2	2	2	3	3	3	41,67	41,67	75,00	50,00	2,00	3,00	1,00	3,00	-0,38	3,00	0,00	0,00	0,00	3,00	4,00	1,00	4,00	1,23	3,00	3,00	3,00	-0,49	1,00	2,00	2,00	-1,06	0,34
1	40	2,00	1	4,00	1	1	1	4	3	2	1	1	1	4	5	3	100,00	50,00	100,00	25,00	2,00	2,00	2,00	2,00	-0,74	4,00	0,00	0,00	0,00	2,00	3,00	3,00	3,00	-0,64	4,00	1,00	3,00	0,62	2,00	2,00	2,00	-0,71	0,65
2	22	2,00	5	2,00	4	4	3	4	4	4	2	2	3	5	4	5	33,33	25,00	66,67	8,33	1,00	1,00	1,00	2,00	-1,61	3,00	0,00	1,00	1,00	3,00	4,00	4,00	4,00	-0,02	4,00	2,00	4,00	0,68	2,00	3,00	2,00	-0,38	0,84
1	64	1,00	4	3,00	4	4	4	2	3	2	2	2	1	3	3	2	25,00	66,67	83,33	58,33	0,00	4,00	3,00	2,00	0,49	4,00	0,00	0,00	0,00	4,00	4,00	2,00	4,00	0,81	4,00	3,00	4,00	0,34	3,00	2,00	3,00	-0,02	1,17
2	62	1,00	2	2,00	1	3	4	4	3	1	1	1	1	4	3	4	58,33	58,33	100,00	33,33	0,00	4,00	1,00	2,00	-0,52	1,00	1,00	0,00	0,00	3,00	3,00	2,00	4,00	0,27	3,00	4,00	3,00	-0,84	3,00	3,00	3,00	0,30	0,51
1	23	3,00	3	2,00	5	5	5	3	1	1	1	1	1	3	3	2	0,00	83,33	100,00	58,33	0,00	4,00	2,00	3,00	0,49	2,00	0,00	0,00	0,00	4,00	2,00	3,00	3,00	-1,18	2,00	2,00	3,00	-0,56	2,00	3,00	4,00	0,29	0,67
1	46	1,00	4	5,00	1	1	1	5	5	4	5	5	5	5	5	5	100,00	8,33	0,00	0,00	1,00	3,00	2,00	2,00	-0,38	5,00	0,00	0,00	0,00	1,00	4,00	2,00	4,00	0,81	3,00	3,00	2,00	-0,90	1,00	1,00	1,00	-1,72	0,39
2	44	1,00	1	4,00	3	2	2	5	3	3	4	4	4	5	5	4	66,67	33,33	25,00	8,33	0,00	2,00	2,00	2,00	-0,74	4,00	0,00	0,00	1,00	3,00	3,00	3,00	3,00	-0,64	4,00	2,00	4,00	0,68	2,00	2,00	2,00	-0,71	0,63
2	55	2,00	3	4,00	3	2	4	4	3	3	4	3	3	5	5	5	50,00	41,67	41,67	0,00	0,00	1,00	1,00	1,00	-2,11	3,00	0,00	0,00	0,00	3,00	3,00	3,00	3,00	-0,64	4,00	3,00	3,00	-0,08	2,00	3,00	3,00	-0,05	0,55
1	65	1,00	5	4,00	5	4	4	3	2	2	2	2	2	3	4	3	16,67	66,67	75,00	41,67	1,00	4,00	3,00	3,00	0,99	4,00	0,00	0,00	0,00	5,00	3,00	3,00	3,00	-0,64	2,00	4,00	3,00	-1,25	4,00	4,00	4,00	1,32	0,46
2	37	3,00	4	3,00	4	4	4	5	5	4	2	1	2	5	5	5	25,00	8,33	83,33	0,00	1,00	2,00	2,00	3,00	-0,25	4,00	0,00	0,00	1,00	2,00	4,00	3,00	3,00	-0,10	4,00	3,00	2,00	-0,49	1,00	3,00	2,00	-0,73	1,76
1	45	3,00	3	2,00	5	5	5	5	2	3	1	1	1	2	2	2	0,00	41,67	100,00	75,00	0,00	3,00	3,00	3,00	0,62	2,00	0,00	0,00	0,00	3,00	4,00	2,00	4,00	0,81	3,00	3,00	3,00	-0,49	2,00	2,00	3,00	-0,37	0,47
1	43	3,00	2	4,00	5	4	4	5	3	4	2	2	2	4	4	3	16,67	25,00	75,00	33,33	0,00	3,00	3,00	2,00	0,12	3,00	0,00	0,00	0,00	2,00	4,00	2,00	3,00	0,32	4,00	2,00	3,00	0,27	2,00	3,00	2,00	-0,38	0,52
1	71	1,00	3	3,00	5	4	4	4	2	2	2	2	2	4	4	4	16,67	58,33	75,00	25,00	0,00	3,00	2,00	2,00	-0,38	3,00	0,00	0,00	0,00	4,00	3,00	2,00	3,00	-0,22	2,00	4,00	2,00	-1,66	3,00	4,00	3,00	0,63	0,87
2	63	1,00	4	2,00	4	4	4	5	4	4	1	4	2	5	5	5	25,00	16,67	66,67	0,00	0,00	2,00	2,00	2,00	-0,74	5,00	0,00	0,00	1,00	1,00	3,00	3,00	2,00	-1,12	5,00	1,00	5,00	1,85	1,00	1,00	1,00	-1,72	0,48
1	64	2,00	1	4,00	5	3	4	4	3	2	2	2	3	4	4	4	25,00	50,00	66,67	25,00	0,00	1,00	2,00	1,00	-1,61	4,00	1,00	0,00	0,00	2,00	3,00	3,00	4,00	-0,15	3,00	4,00	2,00	-1,25	2,00	2,00	3,00	-0,37	0,57
1	74	1,00	2	1,00	4	4	4	3	2	2	2	2	2	3	2	2	25,00	66,67	75,00	66,67	0,00	1,00	2,00	2,00	-1,11	2,00	0,00	0,00	0,00	4,00	2,00	2,00	2,00	-1,25	2,00	4,00	2,00	-1,66	4,00	4,00	4,00	1,32	2,39
1	27	2,00	3	1,00	3	3	3	3	3	3	3	3	3	3	3	3	50,00	50,00	50,00	50,00	0,00	1,00	1,00	4,00	-0,61	3,00	0,00	0,00	0,00	3,00	3,00	3,00	3,00	-0,64	3,00	3,00	3,00	-0,49	3,00	3,00	3,00	0,30	3,37
1	67	1,00	1	4,00	5	5	5	5	2	4	1	1	1	5	5	5	0,00	33,33	100,00	0,00	2,00	3,00	2,00	3,00	0,12	3,00	0,00	0,00	0,00	1,00	4,00	3,00	4,00	0,39	4,00	2,00	5,00	1,09	1,00	4,00	2,00	-0,40	0,57
1	46	3,00	4	2,00	5	4	5	5	2	3	2	2	2	4	5	2	8,33	41,67	75,00	33,33	0,00	3,00	3,00	3,00	0,62	3,00	0,00	0,00	1,00	5,00	5,00	1,00	5,00	2,26	1,00	4,00	1,00	-2,49	4,00	4,00	4,00	1,32	0,57
2	28	1,00	1	4,00	5	5	5	3	3	2	2	2	1	4	3	3	0,00	58,33	83,33	41,67	0,00	1,00	2,00	2,00	-1,11	3,00	0,00	0,00	0,00	4,00	3,00	3,00	4,00	-0,15	3,00	3,00	4,00	-0,08	3,00	3,00	3,00	0,30	0,90
2	43	1,00	4	5,00	3	3	3	5	4	5	3	3	3	5	5	5	50,00	8,33	50,00	0,00	1,00	2,00	2,00	3,00	-0,25	1,00	0,00	0,00	0,00	3,00	5,00	3,00	4,00	0,93	5,00	3,00	3,00	0,34	2,00	2,00	2,00	-0,71	0,38
2	25	1,00	3	4,00	5	4	4	3	2	2	1	2	1	3	3	3	16,67	66,67	91,67	50,00	1,00	3,00	3,00	2,00	0,12	3,00	0,00	0,00	0,00	5,00	5,00	2,00	4,00	1,35	2,00	4,00	2,00	-1,66	4,00	4,00	3,00	0,98	0,56
2	53	2,00	4	5,00	3	1	2	5	4	4	4	2	2	5	5	5	75,00	16,67	58,33	0,00	0,00	1,00	1,00	1,00	-2,11	5,00	1,00	0,00	0,00	1,00	3,00	4,00	2,00	-1,54	4,00	1,00	4,00	1,03	1,00	1,00	2,00	-1,39	0,54
1	49	3,00	3	3,00	4	4	4	4	2	2	2	2	1	4	3	3	25,00	58,33	83,33	41,67	0,00	4,00	2,00	3,00	0,49	3,00	0,00	0,00	0,00	4,00	4,00	2,00	4,00	0,81	3,00	3,00	3,00	-0,49	3,00	3,00	2,00	-0,04	1,11
2	63	2,00	1	3,00	3	3	3	3	3	3	2	2	2	3	3	3	50,00	50,00	75,00	50,00	0,00	1,00	2,00	2,00	-1,11	3,00	0,00	0,00	0,00	4,00	2,00	3,00	4,00	-0,69	3,00	2,00	3,00	-0,14	3,00	3,00	3,00	0,30	1,51
2	23	3,00	1	2,00	3	3	3	4	3	2	3	3	3	4	4	4	50,00	50,00	50,00	25,00	0,00	1,00	1,00	2,00	-1,61	4,00	1,00	1,00	0,00	1,00	2,00	4,00	2,00	-2,08	4,00	2,00	4,00	0,68	3,00	3,00	3,00	0,30	1,05
1	28	1,00	1	2,00	2	1	1	1	2	2	1	1	1	1	2	1	91,67	83,33	100,00	91,67	0,00	5,00	4,00	4,00	2,36	4,00	0,00	0,00	0,00	3,00	.	.	.	.	3,00	2,00	2,00	-0,55	2,00	4,00	3,00	0,28	1,08
2	74	1,00	1	3,00	5	5	5	5	1	1	1	1	1	5	5	1	0,00	66,67	100,00	33,33	1,00	4,00	3,00	2,00	0,49	3,00	0,00	0,00	0,00	4,00	4,00	2,00	4,00	0,81	4,00	3,00	4,00	0,34	2,00	3,00	2,00	-0,38	1,35
2	60	2,00	2	4,00	3	3	3	5	5	5	4	4	3	5	5	5	50,00	0,00	33,33	0,00	0,00	2,00	2,00	2,00	-0,74	3,00	0,00	0,00	0,00	2,00	2,00	4,00	3,00	-1,59	4,00	2,00	4,00	0,68	2,00	2,00	2,00	-0,71	0,44
2	61	3,00	4	2,00	5	5	5	4	3	2	1	1	1	5	5	2	0,00	50,00	100,00	25,00	0,00	2,00	3,00	3,00	0,26	1,00	0,00	0,00	0,00	3,00	4,00	2,00	2,00	-0,17	4,00	2,00	3,00	0,27	3,00	3,00	3,00	0,30	0,48
2	26	1,00	4	4,00	2	3	2	5	5	4	3	2	3	5	5	5	66,67	8,33	58,33	0,00	1,00	2,00	3,00	2,00	-0,24	3,00	0,00	1,00	1,00	3,00	4,00	2,00	4,00	0,81	3,00	2,00	4,00	0,27	3,00	3,00	2,00	-0,04	0,67
2	45	3,00	4	4,00	2	2	2	5	5	5	5	5	5	5	5	5	75,00	0,00	0,00	0,00	0,00	1,00	1,00	1,00	-2,11	.	0,00	0,00	0,00	1,00	3,00	1,00	1,00	-0,78	1,00	3,00	1,00	-2,14	1,00	1,00	1,00	-1,72	0,47
1	57	1,00	4	3,00	4	3	3	3	2	2	2	2	2	2	2	2	41,67	66,67	75,00	75,00	0,00	3,00	3,00	1,00	-0,38	2,00	0,00	0,00	0,00	4,00	4,00	3,00	4,00	0,39	3,00	3,00	3,00	-0,49	4,00	5,00	5,00	1,98	1,89
2	44	3,00	4	4,00	5	5	5	5	3	3	1	1	1	3	3	3	0,00	33,33	100,00	50,00	0,00	2,00	3,00	3,00	0,26	3,00	0,00	0,00	1,00	5,00	4,00	1,00	5,00	1,72	2,00	5,00	1,00	-2,42	4,00	4,00	5,00	1,65	0,47
2	32	1,00	5	4,00	2	3	1	3	2	1	3	1	1	3	2	2	75,00	75,00	83,33	66,67	0,00	4,00	3,00	4,00	1,49	5,00	0,00	1,00	0,00	3,00	4,00	3,00	4,00	0,39	4,00	3,00	3,00	-0,08	3,00	2,00	2,00	-0,36	0,69
2	18	3,00	1	1,00	5	5	5	5	2	2	1	1	1	3	4	2	0,00	50,00	100,00	50,00	1,00	2,00	3,00	1,00	-0,74	4,00	0,00	0,00	0,00	2,00	3,00	2,00	2,00	-0,71	4,00	2,00	2,00	-0,14	2,00	2,00	1,00	-1,05	5,26
2	22	1,00	2	2,00	4	3	2	4	3	3	2	2	3	4	3	4	50,00	41,67	66,67	33,33	1,00	3,00	3,00	3,00	0,62	3,00	0,00	1,00	0,00	3,00	3,00	2,00	4,00	0,27	2,00	3,00	3,00	-0,90	2,00	2,00	3,00	-0,37	0,84
2	49	3,00	1	4,00	5	5	5	2	2	2	1	1	1	1	2	1	0,00	75,00	100,00	91,67	2,00	4,00	3,00	2,00	0,49	2,00	0,00	0,00	0,00	2,00	4,00	3,00	4,00	0,39	3,00	2,00	4,00	0,27	2,00	2,00	4,00	-0,03	0,63
2	74	2,00	4	5,00	3	2	3	5	4	4	2	2	2	4	5	4	58,33	16,67	75,00	16,67	0,00	1,00	2,00	2,00	-1,11	4,00	1,00	0,00	0,00	1,00	3,00	3,00	3,00	-0,64	3,00	3,00	3,00	-0,49	1,00	1,00	1,00	-1,72	0,30
2	49	2,00	1	4,00	2	2	1	5	5	5	5	4	5	5	5	5	83,33	0,00	8,33	0,00	1,00	2,00	4,00	4,00	1,26	4,00	0,00	1,00	0,00	1,00	4,00	2,00	4,00	0,81	4,00	1,00	4,00	1,03	1,00	1,00	1,00	-1,72	0,63
2	46	3,00	4	4,00	4	4	4	4	3	3	1	4	1	4	4	4	25,00	41,67	75,00	25,00	0,00	4,00	3,00	2,00	0,49	2,00	0,00	1,00	0,00	2,00	2,00	3,00	2,00	-1,67	4,00	2,00	4,00	0,68	2,00	2,00	2,00	-0,71	0,47
1	36	3,00	4	5,00	5	4	4	5	4	4	1	1	1	5	5	4	16,67	16,67	100,00	8,33	1,00	3,00	3,00	1,00	-0,38	4,00	0,00	0,00	0,00	2,00	4,00	3,00	4,00	0,39	4,00	3,00	4,00	0,34	1,00	1,00	1,00	-1,72	0,53
2	38	3,00	4	3,00	5	5	5	5	2	2	1	1	1	4	4	4	0,00	50,00	100,00	25,00	1,00	3,00	3,00	2,00	0,12	4,00	0,00	0,00	1,00	2,00	4,00	3,00	2,00	-0,58	5,00	1,00	4,00	1,44	1,00	2,00	4,00	-0,38	1,76
1	45	3,00	4	4,00	4	3	4	5	4	3	2	2	1	3	3	3	33,33	25,00	83,33	50,00	1,00	1,00	3,00	2,00	-0,61	3,00	0,00	0,00	1,00	1,00	2,00	4,00	2,00	-2,08	4,00	2,00	4,00	0,68	2,00	2,00	2,00	-0,71	0,49
1	47	3,00	1	4,00	4	2	2	4	2	2	2	2	2	4	4	3	58,33	58,33	75,00	33,33	0,00	1,00	4,00	3,00	0,39	3,00	0,00	0,00	0,00	4,00	4,00	2,00	4,00	0,81	4,00	2,00	4,00	0,68	2,00	2,00	2,00	-0,71	0,65
2	64	1,00	3	4,00	3	1	3	5	5	4	3	2	2	4	4	4	66,67	8,33	66,67	25,00	0,00	2,00	2,00	2,00	-0,74	3,00	0,00	1,00	0,00	2,00	4,00	2,00	4,00	0,81	4,00	2,00	4,00	0,68	2,00	2,00	2,00	-0,71	0,34
2	65	1,00	3	4,00	3	4	4	4	4	4	2	2	2	4	4	4	33,33	25,00	75,00	25,00	0,00	2,00	4,00	1,00	-0,24	4,00	0,00	0,00	0,00	2,00	4,00	4,00	4,00	-0,02	4,00	2,00	4,00	0,68	2,00	2,00	4,00	-0,03	0,34
1	44	3,00	4	5,00	5	5	5	5	2	2	1	1	1	2	2	2	0,00	50,00	100,00	75,00	2,00	2,00	3,00	2,00	-0,24	3,00	0,00	0,00	0,00	4,00	4,00	2,00	4,00	0,81	2,00	4,00	2,00	-1,66	2,00	2,00	2,00	-0,71	0,39
2	49	3,00	1	4,00	5	5	5	3	1	1	2	2	2	2	2	2	0,00	83,33	75,00	75,00	1,00	2,00	3,00	3,00	0,26	4,00	0,00	1,00	1,00	5,00	5,00	1,00	5,00	2,26	1,00	5,00	1,00	-2,83	4,00	5,00	3,00	1,30	0,63
1	26	3,00	1	2,00	2	1	2	3	3	4	2	2	1	3	2	2	83,33	41,67	83,33	66,67	0,00	5,00	5,00	5,00	3,36	4,00	0,00	0,00	0,00	4,00	4,00	4,00	4,00	-0,02	4,00	4,00	4,00	-0,01	2,00	4,00	3,00	0,28	1,08
2	46	3,00	4	2,00	4	4	4	3	4	3	4	4	4	4	4	4	25,00	41,67	25,00	25,00	1,00	3,00	3,00	2,00	0,12	3,00	0,00	0,00	0,00	4,00	3,00	3,00	4,00	-0,15	4,00	4,00	4,00	-0,01	4,00	4,00	4,00	1,32	0,55
2	46	1,00	1	4,00	2	1	1	5	5	5	5	5	5	5	5	5	91,67	0,00	0,00	0,00	0,00	2,00	2,00	2,00	-0,74	4,00	0,00	0,00	0,00	1,00	3,00	3,00	3,00	-0,64	4,00	3,00	3,00	-0,08	1,00	1,00	1,00	-1,72	0,63
2	21	1,00	1	3,00	2	2	2	4	4	4	2	2	2	4	3	3	75,00	25,00	75,00	41,67	2,00	3,00	2,00	2,00	-0,38	4,00	0,00	0,00	0,00	3,00	4,00	2,00	5,00	1,30	3,00	4,00	4,00	-0,42	2,00	4,00	3,00	0,28	2,46
2	44	1,00	4	4,00	3	3	3	5	4	3	2	2	2	5	5	5	50,00	25,00	75,00	0,00	1,00	2,00	3,00	2,00	-0,24	4,00	0,00	1,00	1,00	1,00	3,00	3,00	2,00	-1,12	3,00	3,00	2,00	-0,90	1,00	1,00	1,00	-1,72	0,47
2	53	2,00	3	4,00	4	1	3	3	3	3	3	3	3	3	4	3	58,33	50,00	50,00	41,67	0,00	1,00	1,00	1,00	-2,11	5,00	1,00	0,00	1,00	1,00	3,00	3,00	4,00	-0,15	5,00	1,00	5,00	1,85	1,00	1,00	1,00	-1,72	0,55
2	26	2,00	1	5,00	4	3	3	5	4	3	1	2	1	2	2	4	41,67	25,00	91,67	58,33	2,00	1,00	1,00	2,00	-1,61	4,00	1,00	0,00	0,00	2,00	5,00	1,00	4,00	1,77	3,00	2,00	4,00	0,27	2,00	2,00	2,00	-0,71	0,72
1	72	1,00	2	3,00	5	5	5	4	3	3	1	2	3	5	3	4	0,00	41,67	75,00	25,00	0,00	4,00	3,00	2,00	0,49	3,00	0,00	0,00	0,00	2,00	3,00	3,00	3,00	-0,64	3,00	3,00	3,00	-0,49	2,00	2,00	2,00	-0,71	1,12
2	66	1,00	3	4,00	4	4	4	2	2	2	1	1	1	4	4	4	25,00	75,00	100,00	25,00	0,00	2,00	2,00	3,00	-0,25	3,00	0,00	0,00	1,00	4,00	4,00	4,00	4,00	-0,02	4,00	4,00	4,00	-0,01	2,00	3,00	2,00	-0,38	0,34
1	63	1,00	5	3,00	3	3	3	4	4	4	1	2	2	4	4	4	50,00	25,00	83,33	25,00	1,00	4,00	4,00	2,00	0,99	2,00	0,00	0,00	0,00	5,00	3,00	3,00	3,00	-0,64	3,00	3,00	3,00	-0,49	4,00	4,00	2,00	0,64	1,25
1	31	3,00	3	3,00	3	2	2	3	3	3	3	3	3	4	4	4	66,67	50,00	50,00	25,00	0,00	2,00	2,00	2,00	-0,74	4,00	0,00	0,00	0,00	3,00	5,00	2,00	5,00	1,84	5,00	2,00	5,00	1,51	3,00	3,00	3,00	0,30	1,50
2	58	1,00	2	5,00	5	4	4	3	3	2	3	1	2	4	4	4	16,67	58,33	75,00	25,00	0,00	2,00	1,00	2,00	-1,25	5,00	1,00	0,00	0,00	2,00	3,00	3,00	2,00	-1,12	4,00	1,00	4,00	1,03	2,00	2,00	4,00	-0,03	0,58
1	61	1,00	4	1,00	3	3	3	3	3	3	3	3	3	3	3	3	50,00	50,00	50,00	50,00	0,00	3,00	3,00	2,00	0,12	3,00	0,00	1,00	1,00	3,00	3,00	3,00	3,00	-0,64	3,00	3,00	3,00	-0,49	3,00	3,00	3,00	0,30	2,49
2	25	1,00	3	2,00	5	1	1	5	4	4	4	5	5	4	4	5	66,67	16,67	8,33	16,67	1,00	3,00	2,00	3,00	0,12	3,00	0,00	0,00	1,00	2,00	4,00	1,00	4,00	1,23	4,00	2,00	4,00	0,68	2,00	2,00	1,00	-1,05	0,65
1	26	2,00	3	2,00	4	4	4	5	2	2	2	2	2	4	4	4	25,00	50,00	75,00	25,00	0,00	3,00	3,00	2,00	0,12	2,00	0,00	0,00	0,00	3,00	4,00	3,00	3,00	-0,10	4,00	2,00	3,00	0,27	2,00	2,00	2,00	-0,71	0,67
1	65	1,00	2	3,00	4	4	4	2	2	3	2	2	2	4	4	4	25,00	66,67	75,00	25,00	0,00	1,00	3,00	2,00	-0,61	4,00	0,00	0,00	0,00	3,00	2,00	4,00	3,00	-1,59	2,00	2,00	4,00	-0,14	2,00	2,00	2,00	-0,71	1,25
1	23	1,00	4	2,00	5	5	5	5	2	1	1	1	1	2	2	2	0,00	58,33	100,00	75,00	0,00	4,00	3,00	3,00	0,99	2,00	0,00	0,00	0,00	4,00	3,00	2,00	3,00	-0,22	2,00	3,00	2,00	-1,31	2,00	2,00	3,00	-0,37	0,81
1	58	1,00	3	1,00	5	4	5	4	3	1	1	1	1	4	3	4	8,33	58,33	100,00	33,33	1,00	4,00	4,00	2,00	0,99	1,00	0,00	0,00	1,00	4,00	.	.	.	.	.	.	.	.	4,00	3,00	3,00	0,65	3,34
1	70	1,00	4	3,00	5	4	4	4	3	2	2	2	2	4	3	3	16,67	50,00	75,00	41,67	0,00	4,00	4,00	2,00	0,99	4,00	0,00	0,00	0,00	4,00	2,00	3,00	2,00	-1,67	2,00	3,00	2,00	-1,31	3,00	3,00	2,00	-0,04	1,05
2	74	2,00	1	1,00	4	2	3	5	4	3	5	2	2	5	5	4	50,00	25,00	50,00	8,33	0,00	2,00	2,00	1,00	-1,24	5,00	0,00	0,00	1,00	2,00	4,00	4,00	2,00	-1,00	5,00	1,00	5,00	1,85	1,00	1,00	2,00	-1,39	2,89
2	35	3,00	3	4,00	3	3	3	5	4	4	4	3	2	5	5	5	50,00	16,67	50,00	0,00	1,00	3,00	4,00	2,00	0,62	2,00	0,00	0,00	0,00	2,00	2,00	4,00	2,00	-2,08	4,00	2,00	4,00	0,68	2,00	3,00	4,00	0,29	0,53
1	21	3,00	5	2,00	2	2	2	5	4	4	4	4	4	5	5	5	75,00	16,67	25,00	0,00	0,00	2,00	4,00	4,00	1,26	4,00	0,00	0,00	1,00	1,00	4,00	2,00	4,00	0,81	4,00	2,00	5,00	1,09	1,00	1,00	1,00	-1,72	0,87
2	58	1,00	3	3,00	4	3	3	3	3	2	2	1	1	4	4	2	41,67	58,33	91,67	41,67	0,00	2,00	3,00	2,00	-0,24	3,00	0,00	0,00	0,00	3,00	3,00	2,00	3,00	-0,22	4,00	3,00	3,00	-0,08	2,00	2,00	2,00	-0,71	1,52
2	24	2,00	4	4,00	3	3	3	3	3	3	4	3	3	5	5	5	50,00	50,00	41,67	0,00	2,00	3,00	3,00	3,00	0,62	4,00	0,00	1,00	0,00	3,00	4,00	3,00	4,00	0,39	4,00	2,00	4,00	0,68	3,00	2,00	2,00	-0,36	0,67
1	64	1,00	4	5,00	4	2	2	3	3	3	1	2	3	4	4	3	58,33	50,00	75,00	33,33	0,00	5,00	4,00	2,00	1,36	5,00	0,00	0,00	1,00	4,00	5,00	2,00	4,00	1,35	3,00	4,00	2,00	-1,25	1,00	2,00	1,00	-1,40	0,34
1	33	3,00	5	3,00	3	4	4	2	4	4	2	2	3	2	4	3	33,33	41,67	66,67	50,00	2,00	2,00	3,00	2,00	-0,24	1,00	0,00	1,00	0,00	3,00	3,00	3,00	3,00	-0,64	3,00	3,00	3,00	-0,49	3,00	4,00	4,00	0,97	1,95
2	38	3,00	1	4,00	5	5	4	3	2	2	1	1	1	1	2	2	8,33	66,67	100,00	83,33	0,00	3,00	3,00	2,00	0,12	3,00	0,00	0,00	0,00	2,00	3,00	3,00	3,00	-0,64	4,00	2,00	5,00	1,09	2,00	3,00	3,00	-0,05	0,85
2	40	3,00	2	5,00	4	3	3	3	3	2	2	2	2	3	3	3	41,67	58,33	75,00	50,00	0,00	4,00	3,00	3,00	0,99	4,00	0,00	0,00	0,00	2,00	4,00	4,00	4,00	-0,02	4,00	4,00	4,00	-0,01	3,00	3,00	3,00	0,30	0,41
1	59	3,00	1	5,00	5	4	4	5	2	2	3	3	2	4	4	2	16,67	50,00	58,33	41,67	0,00	3,00	3,00	2,00	0,12	3,00	0,00	0,00	0,00	1,00	4,00	2,00	3,00	0,32	4,00	2,00	4,00	0,68	2,00	2,00	2,00	-0,71	0,74
2	57	1,00	3	3,00	5	3	3	5	5	4	1	1	1	3	3	3	33,33	8,33	100,00	50,00	0,00	3,00	2,00	2,00	-0,38	1,00	0,00	0,00	0,00	4,00	3,00	3,00	3,00	-0,64	3,00	2,00	4,00	0,27	4,00	5,00	2,00	0,97	1,52
2	25	1,00	4	4,00	4	3	4	3	1	2	1	1	1	3	2	2	33,33	75,00	100,00	66,67	0,00	1,00	1,00	1,00	-2,11	4,00	0,00	0,00	0,00	2,00	4,00	2,00	3,00	0,32	4,00	1,00	5,00	1,44	2,00	1,00	3,00	-0,70	0,67
1	33	3,00	4	5,00	3	2	2	3	3	3	3	2	2	2	3	2	66,67	50,00	66,67	66,67	0,00	4,00	3,00	2,00	0,49	4,00	0,00	0,00	0,00	3,00	3,00	2,00	2,00	-0,71	3,00	2,00	4,00	0,27	2,00	2,00	2,00	-0,71	0,53
2	74	2,00	1	4,00	4	4	4	3	2	2	2	2	2	4	4	4	25,00	66,67	75,00	25,00	0,00	1,00	1,00	2,00	-1,61	3,00	0,00	0,00	0,00	4,00	4,00	3,00	3,00	-0,10	3,00	3,00	3,00	-0,49	3,00	3,00	4,00	0,64	0,49
2	62	1,00	3	3,00	4	4	4	4	4	4	1	1	1	4	4	4	25,00	25,00	100,00	25,00	1,00	4,00	3,00	2,00	0,49	3,00	0,00	0,00	0,00	5,00	4,00	2,00	4,00	0,81	4,00	2,00	4,00	0,68	5,00	5,00	5,00	2,33	0,93
2	54	3,00	1	5,00	3	3	3	4	3	2	2	2	2	4	4	3	50,00	50,00	75,00	33,33	0,00	1,00	1,00	1,00	-2,11	5,00	1,00	0,00	0,00	2,00	3,00	3,00	3,00	-0,64	3,00	3,00	3,00	-0,49	2,00	2,00	2,00	-0,71	0,72
1	75	1,00	4	3,00	4	4	4	2	2	2	2	2	2	4	4	3	25,00	75,00	75,00	33,33	0,00	4,00	3,00	3,00	0,99	3,00	0,00	1,00	0,00	4,00	4,00	2,00	4,00	0,81	3,00	3,00	3,00	-0,49	3,00	2,00	2,00	-0,36	1,05
1	29	3,00	4	5,00	4	2	5	5	1	2	1	2	1	2	2	3	33,33	58,33	91,67	66,67	0,00	4,00	3,00	3,00	0,99	3,00	0,00	0,00	0,00	5,00	3,00	3,00	3,00	-0,64	3,00	3,00	3,00	-0,49	3,00	4,00	3,00	0,63	0,56
1	34	3,00	1	4,00	5	4	4	5	2	1	1	1	1	1	1	2	16,67	58,33	100,00	91,67	2,00	3,00	2,00	2,00	-0,38	4,00	0,00	0,00	0,00	2,00	2,00	2,00	5,00	0,22	4,00	2,00	5,00	1,09	5,00	5,00	2,00	1,31	0,88
1	67	2,00	3	4,00	5	5	5	2	2	2	1	1	1	1	1	2	0,00	75,00	100,00	91,67	0,00	2,00	3,00	1,00	-0,74	3,00	0,00	0,00	0,00	3,00	4,00	2,00	4,00	0,81	3,00	3,00	2,00	-0,90	2,00	2,00	4,00	-0,03	0,35
2	19	3,00	5	2,00	3	3	3	4	3	2	2	2	2	2	2	2	50,00	50,00	75,00	75,00	2,00	4,00	4,00	4,00	1,99	4,00	0,00	0,00	0,00	3,00	5,00	1,00	5,00	2,26	5,00	1,00	5,00	1,85	4,00	3,00	3,00	0,65	0,84
1	25	1,00	5	4,00	4	3	4	2	2	2	2	1	1	3	3	2	33,33	75,00	91,67	58,33	2,00	3,00	3,00	3,00	0,62	2,00	0,00	0,00	0,00	3,00	3,00	2,00	4,00	0,27	3,00	2,00	3,00	-0,14	4,00	4,00	3,00	0,98	0,75
1	64	1,00	2	3,00	5	2	4	4	2	2	2	2	1	3	3	3	33,33	58,33	83,33	50,00	0,00	1,00	3,00	2,00	-0,61	4,00	1,00	0,00	0,00	3,00	3,00	3,00	4,00	-0,15	3,00	3,00	4,00	-0,08	3,00	2,00	2,00	-0,36	1,25
2	31	1,00	5	5,00	3	3	3	4	5	4	2	2	3	5	5	5	50,00	16,67	66,67	0,00	0,00	3,00	2,00	2,00	-0,38	3,00	0,00	0,00	0,00	2,00	4,00	2,00	4,00	0,81	4,00	1,00	4,00	1,03	1,00	1,00	2,00	-1,39	0,56
2	46	3,00	5	2,00	4	2	2	4	4	3	2	2	2	5	5	5	58,33	33,33	75,00	0,00	1,00	5,00	2,00	2,00	0,35	3,00	0,00	0,00	1,00	2,00	3,00	3,00	3,00	-0,64	4,00	2,00	4,00	0,68	1,00	2,00	1,00	-1,40	0,59
1	72	1,00	3	3,00	5	4	4	3	3	2	2	2	2	2	2	3	16,67	58,33	75,00	66,67	1,00	2,00	3,00	2,00	-0,24	4,00	0,00	0,00	0,00	4,00	3,00	2,00	3,00	-0,22	4,00	3,00	4,00	0,34	2,00	2,00	3,00	-0,37	0,87
2	20	3,00	1	2,00	3	1	2	4	3	3	3	2	2	3	3	3	75,00	41,67	66,67	50,00	0,00	2,00	3,00	3,00	0,26	4,00	0,00	1,00	0,00	3,00	3,00	3,00	3,00	-0,64	4,00	3,00	4,00	0,34	3,00	4,00	3,00	0,63	1,05
1	48	2,00	2	4,00	3	3	3	3	2	1	1	1	1	3	3	4	50,00	75,00	100,00	41,67	0,00	4,00	3,00	2,00	0,49	2,00	0,00	0,00	0,00	5,00	5,00	2,00	5,00	1,84	1,00	5,00	1,00	-2,83	4,00	4,00	4,00	1,32	0,52
1	47	2,00	3	3,00	3	3	3	3	3	3	3	3	3	3	3	3	50,00	50,00	50,00	50,00	1,00	2,00	3,00	2,00	-0,24	3,00	0,00	0,00	0,00	3,00	.	.	.	.	.	.	.	.	3,00	3,00	3,00	0,30	1,11
2	42	3,00	3	2,00	4	1	1	3	3	2	2	2	2	4	4	4	75,00	58,33	75,00	25,00	2,00	2,00	3,00	3,00	0,26	5,00	0,00	1,00	1,00	3,00	3,00	2,00	4,00	0,27	4,00	2,00	4,00	0,68	2,00	2,00	2,00	-0,71	0,46
1	29	2,00	4	5,00	4	4	4	5	5	5	2	2	1	4	4	2	25,00	0,00	83,33	41,67	0,00	3,00	2,00	3,00	0,12	4,00	0,00	0,00	0,00	1,00	2,00	5,00	2,00	-2,50	5,00	1,00	5,00	1,85	1,00	1,00	1,00	-1,72	0,56
2	43	2,00	1	4,00	3	3	3	3	3	3	2	3	2	3	3	3	50,00	50,00	66,67	50,00	0,00	2,00	4,00	4,00	1,26	2,00	0,00	0,00	0,00	3,00	3,00	3,00	3,00	-0,64	3,00	3,00	3,00	-0,49	4,00	4,00	4,00	1,32	0,63
2	63	3,00	4	3,00	5	2	4	2	3	3	2	2	1	5	4	4	33,33	58,33	83,33	16,67	0,00	4,00	4,00	2,00	0,99	4,00	0,00	1,00	1,00	5,00	3,00	3,00	3,00	-0,64	3,00	3,00	2,00	-0,90	3,00	2,00	1,00	-0,70	1,13
1	66	1,00	4	1,00	2	1	1	4	4	2	2	2	2	5	4	5	91,67	41,67	75,00	8,33	1,00	5,00	2,00	2,00	0,35	4,00	0,00	1,00	0,00	3,00	4,00	4,00	3,00	-0,51	2,00	3,00	3,00	-0,90	2,00	2,00	2,00	-0,71	2,49
1	74	1,00	3	4,00	5	3	5	5	4	3	1	1	1	5	4	4	16,67	25,00	100,00	16,67	0,00	3,00	3,00	3,00	0,62	3,00	0,00	0,00	0,00	4,00	5,00	1,00	5,00	2,26	3,00	3,00	3,00	-0,49	3,00	2,00	4,00	0,31	0,31
1	42	2,00	3	1,00	3	3	1	4	4	5	5	2	3	5	4	4	66,67	16,67	41,67	16,67	0,00	3,00	2,00	2,00	-0,38	3,00	0,00	0,00	0,00	2,00	3,00	3,00	3,00	-0,64	4,00	2,00	3,00	0,27	2,00	2,00	3,00	-0,37	2,37
2	49	3,00	1	3,00	2	1	2	4	4	4	2	2	2	3	4	4	83,33	25,00	75,00	33,33	1,00	2,00	2,00	2,00	-0,74	4,00	0,00	0,00	1,00	2,00	4,00	3,00	3,00	-0,10	4,00	2,00	4,00	0,68	2,00	2,00	3,00	-0,37	1,73
2	42	3,00	3	2,00	1	1	2	5	5	5	1	1	1	5	5	5	91,67	0,00	100,00	0,00	3,00	3,00	4,00	3,00	1,12	5,00	0,00	0,00	1,00	1,00	5,00	1,00	5,00	2,26	5,00	5,00	5,00	0,47	1,00	1,00	1,00	-1,72	0,46
1	48	3,00	3	4,00	5	4	4	4	4	4	2	1	1	5	5	5	16,67	25,00	91,67	0,00	1,00	3,00	4,00	1,00	0,12	3,00	0,00	0,00	1,00	3,00	4,00	2,00	4,00	0,81	4,00	2,00	4,00	0,68	2,00	3,00	2,00	-0,38	0,40
2	21	3,00	3	2,00	3	2	2	3	3	2	2	2	2	3	3	3	66,67	58,33	75,00	50,00	0,00	1,00	3,00	3,00	-0,11	4,00	0,00	1,00	1,00	4,00	4,00	3,00	2,00	-0,58	3,00	3,00	4,00	-0,08	2,00	2,00	2,00	-0,71	0,65
2	43	3,00	2	4,00	3	2	1	4	2	3	2	2	2	4	4	4	75,00	50,00	75,00	25,00	3,00	1,00	2,00	3,00	-0,61	3,00	0,00	1,00	1,00	4,00	2,00	3,00	2,00	-1,67	2,00	3,00	2,00	-1,31	3,00	3,00	3,00	0,30	0,50
1	63	1,00	4	4,00	3	2	2	3	3	3	2	2	2	2	3	2	66,67	50,00	75,00	66,67	0,00	2,00	3,00	1,00	-0,74	2,00	0,00	0,00	0,00	4,00	3,00	3,00	2,00	-1,12	4,00	4,00	4,00	-0,01	2,00	2,00	2,00	-0,71	0,42
1	70	1,00	1	3,00	5	3	4	5	2	2	2	2	2	3	3	3	25,00	50,00	75,00	50,00	0,00	3,00	3,00	2,00	0,12	4,00	0,00	0,00	0,00	4,00	4,00	2,00	3,00	0,32	3,00	3,00	2,00	-0,90	3,00	4,00	3,00	0,63	1,40
1	64	1,00	4	4,00	4	4	4	4	3	2	1	2	2	4	4	4	25,00	50,00	83,33	25,00	1,00	1,00	2,00	2,00	-1,11	2,00	0,00	1,00	0,00	5,00	4,00	2,00	4,00	0,81	1,00	4,00	1,00	-2,49	4,00	5,00	1,00	0,63	0,42
2	28	2,00	2	4,00	2	3	2	3	4	3	3	4	3	3	4	3	66,67	41,67	41,67	41,67	2,00	4,00	4,00	3,00	1,49	4,00	0,00	0,00	0,00	3,00	4,00	4,00	4,00	-0,02	2,00	4,00	3,00	-1,25	2,00	3,00	2,00	-0,38	0,72
2	42	1,00	4	2,00	3	3	2	5	4	4	2	2	3	4	3	4	58,33	16,67	66,67	33,33	0,00	2,00	3,00	2,00	-0,24	3,00	0,00	1,00	0,00	2,00	3,00	2,00	3,00	-0,22	4,00	2,00	4,00	0,68	1,00	2,00	3,00	-0,72	0,55
2	69	1,00	3	4,00	4	4	5	2	1	1	1	1	1	2	3	3	16,67	91,67	100,00	58,33	0,00	2,00	3,00	2,00	-0,24	5,00	0,00	0,00	0,00	5,00	2,00	3,00	3,00	-1,18	4,00	2,00	5,00	1,09	5,00	5,00	5,00	2,33	0,34
1	42	1,00	1	2,00	5	3	4	4	2	2	2	2	1	3	3	2	25,00	58,33	83,33	58,33	0,00	3,00	2,00	3,00	0,12	4,00	0,00	0,00	0,00	2,00	5,00	1,00	5,00	2,26	5,00	1,00	5,00	1,85	1,00	1,00	1,00	-1,72	0,76
2	25	1,00	1	4,00	4	3	3	5	3	3	2	2	2	3	3	3	41,67	33,33	75,00	50,00	0,00	1,00	2,00	2,00	-1,11	3,00	0,00	0,00	0,00	3,00	3,00	3,00	3,00	-0,64	3,00	2,00	3,00	-0,14	1,00	1,00	1,00	-1,72	0,90
2	39	3,00	1	4,00	5	3	3	5	3	3	2	2	2	5	5	5	33,33	33,33	75,00	0,00	2,00	2,00	3,00	2,00	-0,24	5,00	0,00	1,00	0,00	2,00	1,00	4,00	1,00	-3,11	5,00	1,00	5,00	1,85	1,00	1,00	3,00	-1,05	0,85
2	54	1,00	2	1,00	1	1	1	5	3	3	5	5	5	3	5	5	100,00	33,33	0,00	16,67	0,00	3,00	2,00	2,00	-0,38	1,00	0,00	1,00	0,00	1,00	5,00	3,00	3,00	0,45	5,00	1,00	5,00	1,85	1,00	1,00	1,00	-1,72	4,18
2	27	2,00	1	5,00	4	2	1	4	3	3	2	3	3	4	4	4	66,67	41,67	58,33	25,00	0,00	1,00	1,00	1,00	-2,11	3,00	0,00	0,00	0,00	1,00	3,00	1,00	4,00	0,69	4,00	2,00	3,00	0,27	1,00	1,00	2,00	-1,39	0,72
1	43	1,00	1	5,00	3	1	2	5	2	1	2	1	2	2	2	2	75,00	58,33	83,33	75,00	1,00	3,00	1,00	1,00	-1,38	.	0,00	0,00	0,00	2,00	4,00	1,00	4,00	1,23	4,00	5,00	1,00	-1,59	1,00	2,00	1,00	-1,40	0,53
1	56	1,00	1	5,00	5	5	1	3	1	2	1	1	1	4	4	4	33,33	75,00	100,00	25,00	0,00	4,00	3,00	2,00	0,49	1,00	0,00	0,00	0,00	4,00	3,00	2,00	4,00	0,27	3,00	2,00	3,00	-0,14	3,00	4,00	3,00	0,63	0,74
2	52	1,00	5	1,00	3	3	3	4	3	3	2	2	1	2	2	3	50,00	41,67	83,33	66,67	1,00	3,00	3,00	3,00	0,62	2,00	0,00	0,00	0,00	3,00	3,00	3,00	3,00	-0,64	3,00	3,00	3,00	-0,49	3,00	3,00	3,00	0,30	4,21
2	23	1,00	5	2,00	1	1	1	5	4	4	4	4	3	5	4	5	100,00	16,67	33,33	8,33	0,00	2,00	3,00	3,00	0,26	3,00	0,00	0,00	0,00	3,00	4,00	3,00	4,00	0,39	4,00	3,00	4,00	0,34	2,00	2,00	3,00	-0,37	0,84
2	21	2,00	4	2,00	4	4	4	5	5	4	3	2	2	5	5	5	25,00	8,33	66,67	0,00	1,00	1,00	1,00	1,00	-2,11	5,00	1,00	1,00	0,00	1,00	2,00	4,00	2,00	-2,08	5,00	1,00	4,00	1,44	1,00	1,00	2,00	-1,39	0,79
1	59	1,00	4	3,00	5	5	5	1	1	1	1	3	1	1	1	1	0,00	100,00	83,33	100,00	0,00	3,00	4,00	1,00	0,12	1,00	0,00	0,00	0,00	5,00	3,00	3,00	3,00	-0,64	1,00	1,00	1,00	-1,45	5,00	5,00	4,00	1,99	1,89
1	47	3,00	1	5,00	5	4	5	4	2	2	1	2	2	3	4	2	8,33	58,33	83,33	50,00	1,00	3,00	2,00	3,00	0,12	2,00	0,00	0,00	0,00	4,00	4,00	2,00	5,00	1,30	3,00	3,00	2,00	-0,90	4,00	4,00	3,00	0,98	0,53
1	62	3,00	1	4,00	5	4	5	3	2	3	2	1	2	3	3	2	8,33	58,33	83,33	58,33	0,00	3,00	3,00	2,00	0,12	2,00	0,00	0,00	0,00	4,00	3,00	3,00	3,00	-0,64	2,00	4,00	3,00	-1,25	5,00	4,00	4,00	1,66	0,57
1	69	2,00	3	3,00	4	3	4	3	3	3	2	2	2	3	3	3	33,33	50,00	75,00	50,00	0,00	3,00	3,00	1,00	-0,38	3,00	0,00	0,00	0,00	3,00	3,00	4,00	3,00	-1,05	3,00	3,00	3,00	-0,49	3,00	3,00	3,00	0,30	0,96
1	51	3,00	5	3,00	4	4	4	3	2	2	2	2	2	3	2	2	25,00	66,67	75,00	66,67	1,00	4,00	3,00	2,00	0,49	3,00	0,00	0,00	1,00	5,00	4,00	1,00	5,00	1,72	1,00	5,00	1,00	-2,83	4,00	4,00	4,00	1,32	2,04
2	60	3,00	2	3,00	1	1	1	5	3	4	5	1	5	5	5	5	100,00	25,00	33,33	0,00	0,00	1,00	3,00	3,00	-0,11	3,00	0,00	0,00	1,00	3,00	4,00	2,00	4,00	0,81	4,00	2,00	4,00	0,68	2,00	4,00	5,00	0,96	1,21
1	66	2,00	4	4,00	5	5	4	2	2	2	1	1	1	3	3	2	8,33	75,00	100,00	58,33	0,00	4,00	3,00	2,00	0,49	3,00	0,00	0,00	0,00	5,00	2,00	3,00	3,00	-1,18	4,00	2,00	4,00	0,68	4,00	5,00	3,00	1,30	0,42
1	39	3,00	2	4,00	5	5	5	2	1	1	1	1	1	2	3	2	0,00	91,67	100,00	66,67	2,00	3,00	3,00	3,00	0,62	2,00	0,00	0,00	0,00	3,00	3,00	2,00	4,00	0,27	3,00	2,00	4,00	0,27	2,00	3,00	3,00	-0,05	0,71
2	43	3,00	3	3,00	1	4	1	4	2	2	2	2	5	4	2	4	75,00	58,33	50,00	41,67	1,00	3,00	3,00	3,00	0,62	2,00	0,00	0,00	0,00	4,00	3,00	3,00	3,00	-0,64	3,00	2,00	2,00	-0,55	4,00	3,00	3,00	0,65	1,07
2	49	3,00	2	3,00	5	5	5	2	2	2	1	1	1	2	2	2	0,00	75,00	100,00	75,00	0,00	4,00	2,00	3,00	0,49	3,00	0,00	0,00	1,00	3,00	4,00	3,00	4,00	0,39	5,00	1,00	5,00	1,85	2,00	2,00	1,00	-1,05	1,39
1	29	1,00	3	3,00	5	5	5	5	2	3	1	1	1	3	3	3	0,00	41,67	100,00	50,00	2,00	2,00	2,00	2,00	-0,74	5,00	0,00	0,00	0,00	2,00	3,00	2,00	2,00	-0,71	5,00	1,00	5,00	1,85	1,00	1,00	1,00	-1,72	1,58
1	59	1,00	1	3,00	4	3	3	3	2	2	2	2	2	4	4	4	41,67	66,67	75,00	25,00	1,00	3,00	3,00	2,00	0,12	3,00	0,00	0,00	1,00	2,00	4,00	2,00	4,00	0,81	4,00	2,00	4,00	0,68	3,00	2,00	3,00	-0,02	2,53
2	64	1,00	4	4,00	3	2	2	5	4	4	2	2	2	5	4	4	66,67	16,67	75,00	16,67	0,00	4,00	2,00	2,00	-0,01	3,00	0,00	0,00	1,00	3,00	3,00	3,00	3,00	-0,64	4,00	3,00	4,00	0,34	2,00	2,00	2,00	-0,71	0,41
1	67	2,00	3	1,00	4	3	3	4	3	2	2	2	2	4	4	3	41,67	50,00	75,00	33,33	0,00	4,00	4,00	2,00	0,99	4,00	0,00	0,00	1,00	4,00	3,00	3,00	2,00	-1,12	3,00	3,00	3,00	-0,49	3,00	4,00	3,00	0,63	2,06
1	47	2,00	5	5,00	4	4	4	3	2	2	2	2	2	3	2	2	25,00	66,67	75,00	66,67	0,00	4,00	2,00	2,00	-0,01	2,00	0,00	0,00	1,00	3,00	3,00	3,00	3,00	-0,64	4,00	2,00	4,00	0,68	3,00	3,00	3,00	0,30	0,42
2	66	1,00	1	4,00	5	5	5	2	2	1	2	2	2	4	4	3	0,00	83,33	75,00	33,33	0,00	3,00	4,00	1,00	0,12	4,00	0,00	0,00	0,00	3,00	5,00	1,00	5,00	2,26	2,00	4,00	2,00	-1,66	3,00	4,00	2,00	0,29	0,55
2	60	2,00	4	4,00	1	1	1	5	5	5	5	5	5	5	5	5	100,00	0,00	0,00	0,00	0,00	1,00	1,00	1,00	-2,11	5,00	0,00	0,00	1,00	1,00	5,00	3,00	4,00	0,93	5,00	3,00	4,00	0,75	1,00	1,00	1,00	-1,72	0,41
1	70	1,00	4	5,00	4	4	3	3	2	2	2	1	2	4	4	4	33,33	66,67	83,33	25,00	0,00	3,00	3,00	2,00	0,12	4,00	0,00	0,00	0,00	4,00	3,00	3,00	4,00	-0,15	3,00	3,00	4,00	-0,08	3,00	4,00	3,00	0,63	0,31
2	27	1,00	2	2,00	3	3	2	5	3	3	3	3	2	4	4	4	58,33	33,33	58,33	25,00	1,00	5,00	3,00	4,00	1,85	2,00	1,00	0,00	0,00	3,00	4,00	2,00	4,00	0,81	5,00	1,00	5,00	1,85	4,00	4,00	3,00	0,98	0,84
1	27	2,00	1	4,00	4	4	4	4	2	2	2	2	2	2	2	2	25,00	58,33	75,00	75,00	0,00	3,00	3,00	2,00	0,12	4,00	0,00	0,00	0,00	3,00	4,00	2,00	2,00	-0,17	4,00	2,00	2,00	-0,14	3,00	3,00	3,00	0,30	0,93
2	22	1,00	1	2,00	3	2	3	4	4	4	2	2	1	4	5	3	58,33	25,00	83,33	25,00	1,00	1,00	3,00	1,00	-1,11	5,00	0,00	0,00	0,00	1,00	5,00	1,00	4,00	1,77	5,00	1,00	5,00	1,85	1,00	1,00	1,00	-1,72	1,05
1	69	2,00	4	2,00	5	4	4	5	3	3	2	2	2	4	4	4	16,67	33,33	75,00	25,00	0,00	5,00	3,00	3,00	1,35	4,00	0,00	0,00	0,00	4,00	4,00	1,00	4,00	1,23	4,00	2,00	4,00	0,68	2,00	3,00	2,00	-0,38	0,50
2	59	1,00	1	5,00	4	4	4	5	3	4	2	3	2	3	4	4	25,00	25,00	66,67	33,33	1,00	2,00	1,00	3,00	-0,75	3,00	0,00	0,00	1,00	3,00	3,00	3,00	3,00	-0,64	3,00	3,00	3,00	-0,49	3,00	4,00	2,00	0,29	0,72
1	27	1,00	3	3,00	3	3	3	3	3	3	3	3	3	3	3	3	50,00	50,00	50,00	50,00	0,00	3,00	3,00	3,00	0,62	3,00	0,00	1,00	0,00	3,00	3,00	3,00	3,00	-0,64	3,00	3,00	3,00	-0,49	3,00	3,00	3,00	0,30	1,58
1	70	2,00	1	3,00	4	4	4	3	3	2	3	3	2	2	3	3	25,00	58,33	58,33	58,33	0,00	3,00	4,00	1,00	0,12	4,00	0,00	0,00	1,00	3,00	4,00	4,00	4,00	-0,02	4,00	4,00	4,00	-0,01	2,00	2,00	2,00	-0,71	1,40
2	62	1,00	4	4,00	4	4	4	3	2	2	2	2	2	5	5	3	25,00	66,67	75,00	16,67	1,00	3,00	3,00	2,00	0,12	3,00	0,00	0,00	0,00	4,00	4,00	3,00	4,00	0,39	3,00	3,00	3,00	-0,49	2,00	3,00	2,00	-0,38	0,41
1	64	1,00	2	3,00	2	2	2	3	3	3	2	2	2	3	3	3	75,00	50,00	75,00	50,00	0,00	3,00	2,00	2,00	-0,38	1,00	0,00	0,00	0,00	3,00	4,00	2,00	4,00	0,81	3,00	3,00	3,00	-0,49	3,00	3,00	3,00	0,30	1,25
2	51	2,00	4	3,00	3	2	2	4	4	2	2	2	1	4	4	1	66,67	41,67	83,33	50,00	0,00	4,00	3,00	2,00	0,49	1,00	0,00	0,00	0,00	4,00	3,00	3,00	3,00	-0,64	3,00	4,00	2,00	-1,25	3,00	2,00	3,00	-0,02	1,83
1	35	3,00	2	3,00	5	5	4	1	1	1	1	1	1	1	1	1	8,33	100,00	100,00	100,00	0,00	5,00	3,00	3,00	1,35	1,00	0,00	0,00	0,00	3,00	3,00	3,00	3,00	-0,64	3,00	3,00	3,00	-0,49	5,00	5,00	5,00	2,33	1,94
1	45	1,00	1	5,00	2	1	2	5	4	4	4	4	3	5	4	4	83,33	16,67	33,33	16,67	2,00	1,00	1,00	1,00	-2,11	4,00	1,00	1,00	0,00	2,00	3,00	3,00	3,00	-0,64	5,00	2,00	4,00	1,10	2,00	2,00	3,00	-0,37	0,53
1	25	3,00	2	5,00	1	3	2	1	4	2	1	2	4	2	1	3	75,00	66,67	66,67	75,00	0,00	1,00	3,00	4,00	0,39	.	0,00	1,00	0,00	2,00	5,00	5,00	5,00	0,59	1,00	2,00	4,00	-0,56	2,00	2,00	2,00	-0,71	0,60
2	41	2,00	2	4,00	2	1	2	5	4	4	4	4	4	5	5	5	83,33	16,67	25,00	0,00	1,00	1,00	1,00	2,00	-1,61	4,00	1,00	1,00	0,00	1,00	3,00	1,00	2,00	-0,29	5,00	1,00	4,00	1,44	1,00	1,00	1,00	-1,72	0,50
2	25	1,00	3	3,00	2	2	2	4	3	3	4	4	4	4	4	4	75,00	41,67	25,00	25,00	0,00	2,00	2,00	2,00	-0,74	2,00	0,00	1,00	0,00	3,00	3,00	2,00	3,00	-0,22	3,00	2,00	2,00	-0,55	3,00	3,00	3,00	0,30	1,53
2	20	3,00	3	2,00	5	5	4	1	1	1	1	1	1	1	1	1	8,33	100,00	100,00	100,00	0,00	2,00	2,00	2,00	-0,74	2,00	0,00	0,00	0,00	4,00	3,00	3,00	3,00	-0,64	3,00	3,00	4,00	-0,08	4,00	4,00	4,00	1,32	0,65
2	47	3,00	4	5,00	5	5	4	4	2	1	1	1	1	2	2	1	8,33	66,67	100,00	83,33	1,00	2,00	2,00	2,00	-0,74	2,00	1,00	0,00	0,00	1,00	3,00	3,00	3,00	-0,64	4,00	2,00	5,00	1,09	3,00	3,00	4,00	0,64	0,38
2	69	1,00	2	4,00	4	1	2	4	5	5	2	2	2	5	5	4	66,67	8,33	75,00	8,33	2,00	3,00	3,00	2,00	0,12	5,00	1,00	0,00	0,00	2,00	4,00	2,00	4,00	0,81	3,00	3,00	2,00	-0,90	1,00	2,00	1,00	-1,40	0,44
1	38	3,00	5	4,00	4	4	4	3	2	2	2	2	2	2	2	2	25,00	66,67	75,00	75,00	0,00	3,00	3,00	3,00	0,62	3,00	0,00	0,00	0,00	4,00	4,00	4,00	4,00	-0,02	4,00	3,00	4,00	0,34	4,00	4,00	4,00	1,32	0,71
1	74	1,00	1	4,00	4	1	3	5	5	2	3	3	2	5	5	4	58,33	25,00	58,33	8,33	0,00	1,00	1,00	1,00	-2,11	4,00	1,00	0,00	0,00	2,00	3,00	3,00	2,00	-1,12	2,00	4,00	2,00	-1,66	2,00	3,00	2,00	-0,38	0,51
1	63	2,00	2	4,00	3	3	3	3	3	3	2	2	2	4	4	3	50,00	50,00	75,00	33,33	0,00	3,00	2,00	2,00	-0,38	3,00	1,00	0,00	0,00	3,00	3,00	3,00	3,00	-0,64	2,00	2,00	3,00	-0,56	3,00	3,00	2,00	-0,04	0,45
2	30	3,00	4	5,00	5	4	4	3	2	2	2	2	2	4	4	3	16,67	66,67	75,00	33,33	0,00	1,00	3,00	2,00	-0,61	3,00	0,00	0,00	0,00	4,00	4,00	3,00	4,00	0,39	4,00	2,00	4,00	0,68	3,00	3,00	3,00	0,30	0,52
1	73	1,00	3	4,00	3	1	2	3	4	3	2	3	3	3	3	3	75,00	41,67	58,33	50,00	0,00	5,00	3,00	1,00	0,35	5,00	0,00	0,00	0,00	4,00	3,00	3,00	3,00	-0,64	3,00	3,00	3,00	-0,49	2,00	3,00	2,00	-0,38	0,31
1	72	1,00	1	3,00	3	2	2	4	4	4	3	2	3	4	4	4	66,67	25,00	58,33	25,00	1,00	3,00	2,00	2,00	-0,38	3,00	0,00	0,00	1,00	2,00	4,00	2,00	4,00	0,81	3,00	3,00	3,00	-0,49	2,00	3,00	2,00	-0,38	1,40
2	60	1,00	5	1,00	3	2	2	5	5	2	2	2	2	5	5	5	66,67	25,00	75,00	0,00	1,00	4,00	5,00	1,00	0,99	3,00	0,00	1,00	0,00	4,00	4,00	2,00	4,00	0,81	2,00	2,00	4,00	-0,14	5,00	4,00	3,00	1,32	2,59
2	46	3,00	1	4,00	5	3	3	5	2	1	1	1	1	2	2	2	33,33	58,33	100,00	75,00	2,00	3,00	3,00	2,00	0,12	3,00	0,00	0,00	0,00	2,00	4,00	2,00	4,00	0,81	5,00	1,00	2,00	0,62	2,00	2,00	1,00	-1,05	0,63
2	49	3,00	2	4,00	5	4	4	3	2	2	1	1	1	3	2	2	16,67	66,67	100,00	66,67	0,00	4,00	3,00	3,00	0,99	1,00	0,00	0,00	0,00	4,00	3,00	4,00	2,00	-1,54	4,00	2,00	4,00	0,68	2,00	2,00	3,00	-0,37	0,50
2	26	1,00	4	2,00	5	5	5	5	1	1	1	1	3	2	3	3	0,00	66,67	83,33	58,33	0,00	1,00	1,00	2,00	-1,61	2,00	1,00	0,00	0,00	4,00	4,00	2,00	4,00	0,81	4,00	4,00	3,00	-0,42	5,00	5,00	5,00	2,33	0,79
1	28	3,00	1	4,00	3	3	3	3	4	4	3	3	2	3	3	3	50,00	33,33	58,33	50,00	0,00	3,00	4,00	2,00	0,62	3,00	0,00	0,00	0,00	3,00	3,00	3,00	3,00	-0,64	3,00	3,00	3,00	-0,49	3,00	3,00	3,00	0,30	0,93
1	60	1,00	3	4,00	4	3	4	3	2	2	2	2	2	4	4	4	33,33	66,67	75,00	25,00	2,00	4,00	3,00	2,00	0,49	3,00	0,00	0,00	0,00	2,00	4,00	2,00	4,00	0,81	5,00	1,00	4,00	1,44	3,00	3,00	3,00	0,30	0,35
1	36	1,00	2	5,00	4	2	4	3	2	2	2	2	2	3	3	4	41,67	66,67	75,00	41,67	0,00	2,00	2,00	2,00	-0,74	3,00	0,00	0,00	0,00	2,00	3,00	3,00	3,00	-0,64	4,00	2,00	4,00	0,68	3,00	2,00	4,00	0,31	0,57
2	26	1,00	5	1,00	3	3	3	4	3	3	3	3	2	3	4	4	50,00	41,67	58,33	33,33	0,00	3,00	3,00	3,00	0,62	4,00	0,00	0,00	0,00	3,00	3,00	3,00	4,00	-0,15	3,00	2,00	4,00	0,27	3,00	3,00	2,00	-0,04	4,24
1	33	3,00	4	1,00	2	1	3	4	4	4	4	1	1	4	4	4	75,00	25,00	75,00	25,00	0,00	5,00	3,00	3,00	1,35	5,00	0,00	0,00	0,00	3,00	3,00	3,00	3,00	-0,64	3,00	3,00	3,00	-0,49	3,00	3,00	3,00	0,30	3,88
2	52	1,00	2	3,00	4	3	3	4	3	3	1	1	1	3	3	3	41,67	41,67	100,00	50,00	0,00	4,00	2,00	2,00	-0,01	3,00	0,00	1,00	1,00	4,00	4,00	2,00	3,00	0,32	3,00	3,00	3,00	-0,49	2,00	2,00	3,00	-0,37	1,96
1	62	1,00	3	4,00	5	4	4	2	4	3	1	1	2	3	3	3	16,67	50,00	91,67	50,00	0,00	2,00	3,00	1,00	-0,74	4,00	0,00	0,00	0,00	2,00	3,00	3,00	3,00	-0,64	4,00	2,00	4,00	0,68	2,00	2,00	2,00	-0,71	0,35
1	49	2,00	3	3,00	5	4	4	3	3	2	2	2	2	4	4	3	16,67	58,33	75,00	33,33	0,00	3,00	3,00	1,00	-0,38	3,00	0,00	0,00	0,00	4,00	3,00	3,00	2,00	-1,12	3,00	3,00	3,00	-0,49	3,00	4,00	3,00	0,63	1,11
1	23	2,00	5	2,00	5	4	4	2	2	2	1	1	1	3	3	4	16,67	75,00	100,00	41,67	1,00	3,00	3,00	3,00	0,62	3,00	0,00	0,00	0,00	3,00	3,00	2,00	2,00	-0,71	4,00	2,00	4,00	0,68	3,00	3,00	3,00	0,30	0,87
2	74	1,00	5	4,00	3	3	3	3	1	2	1	1	2	4	3	4	50,00	75,00	91,67	33,33	0,00	3,00	4,00	2,00	0,62	2,00	0,00	0,00	1,00	4,00	4,00	2,00	4,00	0,81	4,00	4,00	4,00	-0,01	4,00	3,00	3,00	0,65	0,40
2	62	1,00	5	3,00	3	3	3	3	2	3	3	4	3	3	3	3	50,00	58,33	41,67	50,00	0,00	1,00	5,00	2,00	0,39	1,00	0,00	0,00	0,00	3,00	3,00	3,00	3,00	-0,64	.	.	.	.	4,00	3,00	3,00	0,65	1,21
2	56	3,00	1	4,00	3	2	4	3	3	2	3	2	2	3	4	4	50,00	58,33	66,67	33,33	0,00	1,00	2,00	2,00	-1,11	3,00	0,00	1,00	0,00	3,00	3,00	3,00	3,00	-0,64	3,00	3,00	3,00	-0,49	2,00	2,00	2,00	-0,71	0,89
1	67	1,00	5	3,00	4	3	3	4	2	2	1	1	2	3	4	2	41,67	58,33	91,67	50,00	1,00	1,00	3,00	2,00	-0,61	3,00	0,00	0,00	0,00	4,00	3,00	3,00	4,00	-0,15	3,00	3,00	3,00	-0,49	2,00	3,00	2,00	-0,38	1,25
1	75	1,00	2	5,00	4	4	4	3	2	2	2	2	3	2	3	3	25,00	66,67	66,67	58,33	1,00	3,00	2,00	2,00	-0,38	2,00	0,00	0,00	0,00	4,00	3,00	3,00	3,00	-0,64	3,00	4,00	4,00	-0,42	2,00	3,00	4,00	0,29	0,33
2	42	2,00	1	4,00	4	4	4	3	2	2	2	2	2	2	3	2	25,00	66,67	75,00	66,67	2,00	2,00	2,00	2,00	-0,74	3,00	0,00	0,00	0,00	2,00	4,00	2,00	4,00	0,81	4,00	2,00	4,00	0,68	2,00	2,00	2,00	-0,71	0,63
1	71	1,00	1	4,00	1	5	1	5	3	1	1	1	1	4	4	3	66,67	50,00	100,00	33,33	0,00	2,00	3,00	2,00	-0,24	3,00	0,00	0,00	0,00	4,00	4,00	2,00	4,00	0,81	4,00	2,00	4,00	0,68	2,00	3,00	2,00	-0,38	0,51
2	67	1,00	1	4,00	4	2	3	3	3	2	1	1	1	2	2	3	50,00	58,33	100,00	66,67	1,00	2,00	3,00	2,00	-0,24	3,00	0,00	0,00	0,00	5,00	4,00	4,00	4,00	-0,02	3,00	4,00	3,00	-0,84	4,00	4,00	3,00	0,98	0,55
2	60	1,00	4	5,00	4	4	4	3	3	3	1	1	1	4	4	3	25,00	50,00	100,00	33,33	2,00	2,00	3,00	2,00	-0,24	5,00	0,00	0,00	0,00	2,00	3,00	3,00	3,00	-0,64	4,00	2,00	4,00	0,68	2,00	2,00	2,00	-0,71	0,33
1	33	2,00	2	3,00	5	5	5	2	3	2	1	1	1	5	5	5	0,00	66,67	100,00	0,00	0,00	1,00	4,00	1,00	-0,61	1,00	0,00	0,00	0,00	5,00	5,00	1,00	1,00	0,30	5,00	1,00	5,00	1,85	3,00	2,00	2,00	-0,36	1,94
1	63	1,00	5	4,00	3	4	4	4	2	2	2	2	2	4	3	3	33,33	58,33	75,00	41,67	1,00	4,00	2,00	2,00	-0,01	3,00	0,00	0,00	0,00	3,00	3,00	3,00	3,00	-0,64	3,00	3,00	3,00	-0,49	3,00	4,00	4,00	0,97	0,46
1	44	3,00	4	4,00	5	4	4	2	2	2	2	2	2	2	2	2	16,67	75,00	75,00	75,00	0,00	4,00	3,00	2,00	0,49	2,00	0,00	0,00	1,00	3,00	3,00	4,00	3,00	-1,05	4,00	2,00	4,00	0,68	3,00	4,00	3,00	0,63	0,49
1	71	1,00	1	5,00	4	4	3	4	3	2	2	2	2	4	4	4	33,33	50,00	75,00	25,00	0,00	4,00	2,00	2,00	-0,01	4,00	0,00	0,00	0,00	4,00	3,00	3,00	4,00	-0,15	4,00	2,00	4,00	0,68	3,00	2,00	4,00	0,31	0,41
1	66	1,00	2	4,00	5	5	4	5	2	1	2	1	1	5	4	3	8,33	58,33	91,67	25,00	0,00	3,00	3,00	3,00	0,62	2,00	0,00	0,00	1,00	4,00	5,00	1,00	4,00	1,77	1,00	5,00	2,00	-2,42	4,00	5,00	3,00	1,30	0,45
1	69	1,00	4	3,00	3	3	3	3	2	1	1	2	1	4	4	3	50,00	75,00	91,67	33,33	1,00	4,00	3,00	3,00	0,99	2,00	0,00	0,00	0,00	4,00	3,00	2,00	4,00	0,27	4,00	2,00	4,00	0,68	3,00	3,00	3,00	0,30	1,17
2	36	2,00	1	4,00	5	4	4	3	2	2	2	2	1	4	4	2	16,67	66,67	83,33	41,67	1,00	1,00	2,00	2,00	-1,11	4,00	1,00	0,00	0,00	2,00	3,00	2,00	3,00	-0,22	5,00	2,00	4,00	1,10	1,00	1,00	2,00	-1,39	0,85
2	70	2,00	1	3,00	3	2	2	4	3	2	2	2	2	4	4	4	66,67	50,00	75,00	25,00	0,00	1,00	1,00	2,00	-1,61	4,00	1,00	0,00	0,00	3,00	4,00	2,00	3,00	0,32	4,00	2,00	4,00	0,68	2,00	3,00	4,00	0,29	1,35
1	31	3,00	3	3,00	2	2	2	4	3	3	2	2	2	3	3	3	75,00	41,67	75,00	50,00	0,00	2,00	3,00	3,00	0,26	4,00	0,00	0,00	0,00	4,00	4,00	2,00	5,00	1,30	4,00	2,00	4,00	0,68	4,00	4,00	4,00	1,32	1,50
1	55	1,00	4	4,00	4	4	4	4	3	3	2	1	2	4	4	4	25,00	41,67	83,33	25,00	0,00	1,00	3,00	2,00	-0,61	4,00	1,00	0,00	0,00	4,00	4,00	3,00	4,00	0,39	4,00	2,00	4,00	0,68	3,00	4,00	3,00	0,63	0,69
1	27	2,00	2	4,00	4	2	3	4	3	3	2	3	2	3	3	3	50,00	41,67	66,67	50,00	0,00	4,00	3,00	2,00	0,49	2,00	0,00	0,00	0,00	2,00	4,00	2,00	4,00	0,81	5,00	5,00	5,00	0,47	2,00	1,00	3,00	-0,70	0,74
1	50	3,00	4	3,00	3	3	3	4	2	2	4	2	3	4	4	4	50,00	58,33	50,00	25,00	0,00	3,00	4,00	2,00	0,62	3,00	0,00	0,00	0,00	4,00	4,00	3,00	4,00	0,39	4,00	3,00	3,00	-0,08	3,00	3,00	3,00	0,30	1,89
1	48	3,00	4	3,00	3	3	3	3	3	3	3	3	3	3	3	3	50,00	50,00	50,00	50,00	1,00	2,00	3,00	3,00	0,26	2,00	0,00	1,00	0,00	3,00	3,00	3,00	3,00	-0,64	3,00	3,00	3,00	-0,49	3,00	3,00	3,00	0,30	1,34
1	58	2,00	1	4,00	4	4	4	4	3	2	2	2	2	4	4	4	25,00	50,00	75,00	25,00	0,00	2,00	4,00	2,00	0,26	3,00	0,00	0,00	0,00	4,00	4,00	2,00	4,00	0,81	3,00	2,00	2,00	-0,55	3,00	3,00	4,00	0,64	0,92
1	33	2,00	4	4,00	4	4	4	3	2	2	1	1	1	4	4	3	25,00	66,67	100,00	33,33	2,00	2,00	3,00	3,00	0,26	3,00	0,00	0,00	0,00	2,00	4,00	2,00	4,00	0,81	3,00	3,00	2,00	-0,90	3,00	2,00	2,00	-0,36	0,66
1	48	3,00	1	5,00	3	3	3	5	4	4	3	3	3	5	5	3	50,00	16,67	50,00	16,67	0,00	5,00	3,00	2,00	0,85	2,00	0,00	1,00	1,00	2,00	4,00	2,00	4,00	0,81	4,00	4,00	4,00	-0,01	2,00	2,00	2,00	-0,71	0,53
2	37	3,00	1	5,00	5	3	5	3	1	1	1	3	1	1	3	3	16,67	83,33	83,33	66,67	1,00	3,00	3,00	2,00	0,12	1,00	0,00	0,00	0,00	5,00	1,00	3,00	3,00	-1,72	3,00	3,00	5,00	0,33	5,00	5,00	5,00	2,33	0,69
2	42	3,00	5	4,00	3	3	3	3	3	3	2	2	2	4	3	2	50,00	50,00	75,00	50,00	0,00	2,00	3,00	2,00	-0,24	3,00	0,00	0,00	0,00	4,00	4,00	2,00	4,00	0,81	3,00	2,00	4,00	0,27	3,00	3,00	2,00	-0,04	0,51
2	33	3,00	1	5,00	5	5	5	3	3	3	1	1	1	3	1	3	0,00	50,00	100,00	66,67	1,00	1,00	3,00	2,00	-0,61	3,00	0,00	0,00	0,00	5,00	3,00	3,00	4,00	-0,15	4,00	2,00	4,00	0,68	5,00	5,00	4,00	1,99	0,69
2	39	3,00	1	4,00	3	3	3	4	2	2	2	2	2	4	4	4	50,00	58,33	75,00	25,00	0,00	2,00	4,00	2,00	0,26	2,00	0,00	0,00	0,00	4,00	.	.	.	.	.	.	.	.	3,00	3,00	2,00	-0,04	0,85
1	47	2,00	3	4,00	3	3	4	3	3	2	3	2	2	3	3	4	41,67	58,33	66,67	41,67	1,00	3,00	4,00	3,00	1,12	3,00	0,00	0,00	0,00	3,00	.	.	.	.	.	.	.	.	3,00	3,00	4,00	0,64	0,40
1	46	3,00	1	2,00	3	2	2	4	4	4	2	3	2	4	4	3	66,67	25,00	66,67	33,33	1,00	3,00	3,00	3,00	0,62	2,00	0,00	0,00	0,00	3,00	4,00	3,00	3,00	-0,10	4,00	4,00	4,00	-0,01	3,00	3,00	4,00	0,64	0,76
1	73	1,00	2	4,00	4	3	3	4	2	2	2	2	2	4	3	3	41,67	58,33	75,00	41,67	1,00	3,00	2,00	2,00	-0,38	4,00	0,00	0,00	0,00	4,00	2,00	2,00	2,00	-1,25	3,00	3,00	3,00	-0,49	3,00	3,00	3,00	0,30	0,41
2	67	2,00	1	4,00	4	3	3	4	2	2	2	2	2	2	3	3	41,67	58,33	75,00	58,33	1,00	2,00	2,00	4,00	0,25	2,00	0,00	0,00	0,00	4,00	3,00	3,00	3,00	-0,64	2,00	3,00	3,00	-0,90	3,00	3,00	3,00	0,30	0,55
1	31	3,00	3	3,00	3	2	2	4	3	3	3	3	3	4	4	4	66,67	41,67	50,00	25,00	0,00	2,00	2,00	2,00	-0,74	4,00	0,00	0,00	0,00	3,00	5,00	2,00	5,00	1,84	5,00	2,00	5,00	1,51	3,00	3,00	3,00	0,30	1,50
2	44	3,00	3	4,00	4	4	4	3	1	1	2	2	1	3	2	3	25,00	83,33	83,33	58,33	0,00	3,00	3,00	3,00	0,62	2,00	0,00	1,00	0,00	4,00	4,00	3,00	3,00	-0,10	3,00	2,00	3,00	-0,14	3,00	3,00	3,00	0,30	0,39
2	31	1,00	1	4,00	3	3	3	5	4	3	2	3	2	3	3	3	50,00	25,00	66,67	50,00	0,00	4,00	2,00	3,00	0,49	4,00	0,00	0,00	0,00	3,00	3,00	4,00	4,00	-0,56	3,00	3,00	4,00	-0,08	3,00	3,00	3,00	0,30	0,85
1	61	2,00	1	5,00	5	5	5	3	2	2	1	1	1	4	4	4	0,00	66,67	100,00	25,00	0,00	2,00	2,00	2,00	-0,74	3,00	0,00	0,00	0,00	4,00	5,00	2,00	3,00	0,86	4,00	3,00	4,00	0,34	2,00	5,00	4,00	0,95	0,46
1	44	3,00	5	4,00	5	4	4	3	3	3	4	2	2	5	4	4	16,67	50,00	58,33	16,67	0,00	4,00	4,00	2,00	0,99	2,00	0,00	0,00	1,00	3,00	3,00	3,00	3,00	-0,64	2,00	3,00	3,00	-0,90	3,00	3,00	3,00	0,30	0,52
2	64	1,00	1	5,00	4	4	4	5	2	2	1	1	1	3	4	3	25,00	50,00	100,00	41,67	1,00	1,00	3,00	3,00	-0,11	4,00	0,00	0,00	0,00	2,00	3,00	3,00	3,00	-0,64	3,00	3,00	3,00	-0,49	1,00	1,00	3,00	-1,05	0,44
1	67	1,00	3	4,00	4	4	4	3	1	1	4	2	2	3	2	3	25,00	83,33	58,33	58,33	0,00	4,00	3,00	3,00	0,99	3,00	0,00	0,00	1,00	3,00	.	.	.	.	.	.	.	.	3,00	3,00	3,00	0,30	0,35
2	51	3,00	2	5,00	3	3	3	4	2	2	2	2	2	2	2	2	50,00	58,33	75,00	75,00	0,00	4,00	3,00	2,00	0,49	4,00	0,00	0,00	1,00	2,00	4,00	3,00	4,00	0,39	4,00	2,00	4,00	0,68	2,00	1,00	2,00	-1,04	0,58
2	58	1,00	1	5,00	4	2	1	4	3	3	3	2	2	5	5	3	66,67	41,67	66,67	16,67	0,00	5,00	3,00	2,00	0,85	4,00	0,00	0,00	0,00	3,00	3,00	3,00	2,00	-1,12	3,00	3,00	2,00	-0,90	2,00	3,00	3,00	-0,05	0,72
2	30	1,00	4	3,00	1	1	1	5	5	5	4	1	3	5	5	5	100,00	0,00	58,33	0,00	0,00	1,00	3,00	3,00	-0,11	2,00	0,00	0,00	0,00	5,00	4,00	1,00	5,00	1,72	1,00	1,00	4,00	-0,21	2,00	4,00	2,00	-0,06	1,76
1	46	3,00	3	1,00	3	1	3	2	2	2	2	2	2	2	2	2	66,67	75,00	75,00	75,00	1,00	4,00	4,00	2,00	0,99	3,00	0,00	1,00	1,00	4,00	4,00	4,00	4,00	-0,02	3,00	3,00	3,00	-0,49	4,00	4,00	4,00	1,32	2,37
2	62	1,00	3	3,00	3	2	3	4	3	3	3	2	2	4	3	2	58,33	41,67	66,67	50,00	2,00	4,00	3,00	2,00	0,49	1,00	0,00	0,00	1,00	3,00	3,00	3,00	3,00	-0,64	1,00	2,00	2,00	-1,38	5,00	4,00	3,00	1,32	0,93
2	32	1,00	1	5,00	4	3	3	3	2	2	1	1	1	4	3	3	41,67	66,67	100,00	41,67	1,00	1,00	2,00	1,00	-1,61	2,00	1,00	0,00	0,00	2,00	4,00	1,00	4,00	1,23	3,00	2,00	3,00	-0,14	2,00	2,00	2,00	-0,71	0,69
1	42	1,00	5	3,00	4	2	3	4	3	3	3	3	3	4	3	3	50,00	41,67	50,00	41,67	0,00	5,00	3,00	3,00	1,35	3,00	0,00	0,00	0,00	3,00	3,00	3,00	3,00	-0,64	3,00	3,00	3,00	-0,49	4,00	3,00	4,00	0,99	1,44
2	36	3,00	1	5,00	4	4	4	5	4	2	2	2	2	4	4	4	25,00	33,33	75,00	25,00	0,00	3,00	2,00	2,00	-0,38	5,00	0,00	1,00	0,00	2,00	2,00	3,00	2,00	-1,67	2,00	3,00	3,00	-0,90	2,00	2,00	3,00	-0,37	0,69
1	74	1,00	4	3,00	3	2	3	2	3	3	2	2	2	2	3	2	58,33	58,33	75,00	66,67	0,00	4,00	2,00	2,00	-0,01	4,00	0,00	0,00	1,00	5,00	4,00	3,00	4,00	0,39	3,00	3,00	3,00	-0,49	3,00	3,00	4,00	0,64	1,05
1	69	2,00	3	1,00	5	5	5	1	1	3	1	1	1	1	1	1	0,00	83,33	100,00	100,00	0,00	3,00	2,00	2,00	-0,38	1,00	0,00	0,00	0,00	5,00	4,00	2,00	4,00	0,81	1,00	5,00	1,00	-2,83	5,00	5,00	5,00	2,33	2,06
1	59	3,00	4	5,00	4	2	2	4	4	4	4	4	2	4	4	4	58,33	25,00	41,67	25,00	0,00	3,00	3,00	2,00	0,12	4,00	0,00	0,00	0,00	2,00	3,00	3,00	2,00	-1,12	4,00	2,00	4,00	0,68	2,00	2,00	2,00	-0,71	0,56
1	58	1,00	2	1,00	5	2	3	2	3	2	2	2	2	3	3	3	41,67	66,67	75,00	50,00	0,00	3,00	4,00	2,00	0,62	2,00	0,00	0,00	0,00	5,00	2,00	4,00	1,00	-2,57	2,00	3,00	2,00	-1,31	4,00	4,00	4,00	1,32	4,32
2	66	1,00	4	4,00	4	3	4	3	3	3	3	2	2	5	4	3	33,33	50,00	66,67	25,00	2,00	3,00	3,00	2,00	0,12	2,00	0,00	0,00	0,00	2,00	4,00	3,00	4,00	0,39	3,00	4,00	3,00	-0,84	2,00	1,00	1,00	-1,38	0,41
2	51	3,00	1	4,00	4	4	4	3	3	2	2	2	2	2	4	3	25,00	58,33	75,00	50,00	1,00	2,00	3,00	3,00	0,26	3,00	0,00	1,00	0,00	3,00	3,00	3,00	3,00	-0,64	3,00	2,00	4,00	0,27	3,00	3,00	3,00	0,30	0,89
1	32	1,00	1	5,00	5	5	4	3	2	2	1	1	1	3	2	1	8,33	66,67	100,00	75,00	0,00	3,00	3,00	3,00	0,62	1,00	0,00	0,00	0,00	2,00	5,00	2,00	4,00	1,35	4,00	1,00	4,00	1,03	3,00	4,00	5,00	1,31	0,71
1	52	3,00	4	4,00	4	2	2	5	5	5	4	2	2	5	5	5	58,33	0,00	58,33	0,00	1,00	3,00	2,00	2,00	-0,38	4,00	0,00	1,00	0,00	1,00	4,00	2,00	3,00	0,32	5,00	1,00	5,00	1,85	2,00	2,00	2,00	-0,71	0,69
2	71	1,00	1	5,00	5	5	5	4	2	1	1	1	1	1	1	1	0,00	66,67	100,00	100,00	0,00	1,00	3,00	2,00	-0,61	1,00	0,00	0,00	0,00	5,00	3,00	3,00	3,00	-0,64	3,00	3,00	3,00	-0,49	5,00	5,00	5,00	2,33	0,40
2	56	1,00	3	4,00	4	2	2	2	2	2	2	2	2	2	2	3	58,33	75,00	75,00	66,67	1,00	2,00	3,00	3,00	0,26	4,00	0,00	0,00	1,00	2,00	4,00	3,00	4,00	0,39	4,00	2,00	4,00	0,68	2,00	3,00	2,00	-0,38	0,55
1	60	2,00	2	3,00	3	3	3	4	3	3	3	2	3	4	4	3	50,00	41,67	58,33	33,33	0,00	3,00	2,00	1,00	-0,88	3,00	0,00	1,00	0,00	3,00	3,00	3,00	3,00	-0,64	3,00	3,00	3,00	-0,49	3,00	3,00	2,00	-0,04	1,25
2	62	1,00	4	4,00	5	4	5	3	1	1	1	1	1	4	3	3	8,33	83,33	100,00	41,67	0,00	1,00	4,00	2,00	-0,11	4,00	0,00	0,00	0,00	5,00	3,00	3,00	3,00	-0,64	3,00	3,00	3,00	-0,49	5,00	5,00	4,00	1,99	0,41
1	47	3,00	3	4,00	4	4	4	4	3	3	2	1	2	2	2	2	25,00	41,67	83,33	75,00	0,00	2,00	4,00	3,00	0,76	3,00	0,00	0,00	1,00	4,00	4,00	2,00	3,00	0,32	4,00	2,00	3,00	0,27	3,00	3,00	3,00	0,30	0,40
1	57	2,00	1	2,00	5	5	5	2	3	2	2	2	4	3	3	3	0,00	66,67	58,33	50,00	0,00	5,00	3,00	3,00	1,35	3,00	0,00	0,00	0,00	3,00	3,00	3,00	3,00	-0,64	3,00	3,00	4,00	-0,08	4,00	4,00	4,00	1,32	1,07
2	39	3,00	5	3,00	3	3	3	4	4	4	2	2	2	2	2	4	50,00	25,00	75,00	58,33	0,00	3,00	3,00	2,00	0,12	1,00	0,00	0,00	1,00	4,00	4,00	2,00	3,00	0,32	3,00	4,00	2,00	-1,25	2,00	4,00	2,00	-0,06	1,89
2	50	3,00	2	1,00	4	3	3	3	3	3	2	2	2	3	3	3	41,67	50,00	75,00	50,00	0,00	3,00	2,00	2,00	-0,38	3,00	0,00	0,00	1,00	3,00	3,00	3,00	3,00	-0,64	3,00	2,00	3,00	-0,14	3,00	3,00	2,00	-0,04	4,18
1	71	1,00	4	4,00	5	4	4	5	3	2	2	2	2	3	3	3	16,67	41,67	75,00	50,00	0,00	1,00	2,00	2,00	-1,11	2,00	0,00	1,00	0,00	3,00	3,00	2,00	3,00	-0,22	2,00	3,00	2,00	-1,31	3,00	3,00	2,00	-0,04	0,38
2	32	3,00	1	4,00	4	2	2	4	4	3	2	2	1	5	5	5	58,33	33,33	83,33	0,00	0,00	4,00	3,00	3,00	0,99	3,00	0,00	0,00	0,00	2,00	3,00	3,00	2,00	-1,12	4,00	2,00	4,00	0,68	3,00	3,00	2,00	-0,04	0,85
1	44	3,00	3	5,00	5	5	5	5	3	1	1	1	1	1	1	2	0,00	50,00	100,00	91,67	3,00	4,00	3,00	2,00	0,49	4,00	0,00	0,00	1,00	2,00	3,00	3,00	2,00	-1,12	2,00	3,00	4,00	-0,49	3,00	2,00	2,00	-0,36	0,33
1	65	2,00	3	4,00	4	3	3	4	3	2	1	1	2	4	3	3	41,67	50,00	91,67	41,67	0,00	2,00	4,00	1,00	-0,24	1,00	0,00	1,00	0,00	5,00	.	.	.	.	3,00	2,00	4,00	0,27	4,00	4,00	3,00	0,98	0,35
2	21	1,00	4	2,00	5	4	4	4	2	2	2	2	1	4	4	2	16,67	58,33	83,33	41,67	0,00	4,00	4,00	2,00	0,99	5,00	0,00	0,00	0,00	2,00	5,00	2,00	4,00	1,35	3,00	4,00	4,00	-0,42	1,00	2,00	2,00	-1,06	0,79
2	48	2,00	1	3,00	4	3	3	4	3	2	4	2	2	4	4	4	41,67	50,00	58,33	25,00	0,00	3,00	1,00	2,00	-0,88	4,00	0,00	0,00	0,00	2,00	4,00	2,00	3,00	0,32	5,00	1,00	4,00	1,44	1,00	1,00	2,00	-1,39	1,73
1	70	1,00	4	4,00	5	5	5	3	2	1	1	2	2	3	2	2	0,00	75,00	83,33	66,67	1,00	4,00	3,00	1,00	-0,01	2,00	0,00	0,00	0,00	5,00	4,00	4,00	4,00	-0,02	2,00	3,00	2,00	-1,31	3,00	4,00	2,00	0,29	0,38
1	52	2,00	3	2,00	3	3	2	2	3	2	2	2	2	3	1	4	58,33	66,67	75,00	58,33	0,00	3,00	2,00	2,00	-0,38	4,00	0,00	0,00	0,00	4,00	2,00	3,00	2,00	-1,67	4,00	2,00	5,00	1,09	3,00	4,00	4,00	0,97	0,67
2	23	2,00	4	3,00	3	3	3	3	3	3	3	3	3	3	3	3	50,00	50,00	50,00	50,00	0,00	1,00	1,00	1,00	-2,11	3,00	1,00	0,00	0,00	3,00	3,00	3,00	3,00	-0,64	3,00	3,00	3,00	-0,49	3,00	3,00	3,00	0,30	1,85
1	26	1,00	1	5,00	3	3	3	3	3	3	3	3	3	3	3	3	50,00	50,00	50,00	50,00	1,00	3,00	4,00	4,00	1,62	3,00	1,00	0,00	0,00	3,00	3,00	4,00	3,00	-1,05	2,00	3,00	4,00	-0,49	3,00	3,00	3,00	0,30	0,75
2	63	3,00	3	3,00	5	2	2	2	1	1	1	1	1	2	1	1	50,00	91,67	100,00	91,67	0,00	1,00	4,00	2,00	-0,11	2,00	0,00	0,00	1,00	5,00	5,00	1,00	5,00	2,26	2,00	2,00	3,00	-0,56	4,00	4,00	5,00	1,65	0,93
2	61	2,00	4	3,00	5	1	1	5	5	5	5	5	5	5	5	5	66,67	0,00	0,00	0,00	0,00	1,00	2,00	2,00	-1,11	5,00	1,00	0,00	1,00	1,00	4,00	3,00	4,00	0,39	5,00	3,00	5,00	1,16	1,00	1,00	2,00	-1,39	1,13
2	24	1,00	1	4,00	3	2	3	5	4	4	3	4	3	4	4	4	58,33	16,67	41,67	25,00	0,00	1,00	2,00	2,00	-1,11	4,00	0,00	0,00	0,00	2,00	4,00	2,00	4,00	0,81	5,00	4,00	4,00	0,40	1,00	1,00	2,00	-1,39	0,90
1	48	2,00	2	3,00	3	3	3	3	3	3	2	2	2	3	3	3	50,00	50,00	75,00	50,00	0,00	1,00	1,00	2,00	-1,61	5,00	1,00	0,00	0,00	5,00	3,00	3,00	3,00	-0,64	3,00	3,00	3,00	-0,49	4,00	5,00	4,00	1,64	1,43
2	63	1,00	1	5,00	5	5	5	2	2	2	1	1	1	3	3	2	0,00	75,00	100,00	58,33	0,00	3,00	3,00	2,00	0,12	3,00	0,00	0,00	0,00	4,00	3,00	3,00	3,00	-0,64	2,00	4,00	2,00	-1,66	4,00	4,00	3,00	0,98	0,44
1	66	1,00	1	4,00	4	2	2	1	2	3	2	2	2	2	2	2	58,33	75,00	75,00	75,00	1,00	2,00	2,00	1,00	-1,24	3,00	0,00	0,00	0,00	4,00	3,00	3,00	3,00	-0,64	3,00	3,00	3,00	-0,49	4,00	3,00	4,00	0,99	0,57
2	49	3,00	5	4,00	5	4	4	3	2	2	1	1	1	3	2	2	16,67	66,67	100,00	66,67	2,00	2,00	4,00	3,00	0,76	3,00	0,00	0,00	0,00	4,00	4,00	1,00	4,00	1,23	4,00	1,00	4,00	1,03	3,00	4,00	2,00	0,29	0,51
1	60	1,00	2	4,00	5	4	5	2	3	3	1	1	1	2	2	2	8,33	58,33	100,00	75,00	0,00	4,00	4,00	1,00	0,49	1,00	0,00	0,00	0,00	4,00	3,00	3,00	3,00	-0,64	2,00	2,00	3,00	-0,56	5,00	5,00	4,00	1,99	0,45
2	24	2,00	1	2,00	2	3	3	3	3	3	3	3	2	3	3	3	58,33	50,00	58,33	50,00	1,00	4,00	4,00	3,00	1,49	2,00	0,00	0,00	0,00	3,00	3,00	4,00	3,00	-1,05	3,00	5,00	3,00	-1,18	3,00	3,00	3,00	0,30	1,05
1	34	3,00	1	5,00	3	3	2	2	2	1	1	2	2	2	2	2	58,33	83,33	83,33	75,00	2,00	3,00	4,00	4,00	1,62	.	0,00	0,00	0,00	3,00	.	.	.	.	3,00	2,00	4,00	0,27	4,00	4,00	3,00	0,98	0,71
1	43	3,00	4	4,00	5	5	5	3	2	2	2	2	2	2	4	2	0,00	66,67	75,00	58,33	1,00	4,00	3,00	2,00	0,49	2,00	0,00	1,00	1,00	4,00	2,00	3,00	2,00	-1,67	2,00	4,00	2,00	-1,66	4,00	3,00	3,00	0,65	0,49
1	31	2,00	1	4,00	3	2	3	5	5	5	4	2	2	5	5	5	58,33	0,00	58,33	0,00	0,00	1,00	2,00	2,00	-1,11	3,00	0,00	0,00	1,00	1,00	3,00	3,00	3,00	-0,64	3,00	3,00	3,00	-0,49	1,00	1,00	1,00	-1,72	0,88
2	71	2,00	1	5,00	4	4	3	5	5	4	2	2	1	5	5	4	33,33	8,33	83,33	8,33	1,00	2,00	3,00	2,00	-0,24	4,00	0,00	0,00	1,00	1,00	4,00	1,00	4,00	1,23	4,00	1,00	4,00	1,03	2,00	1,00	1,00	-1,38	0,40
1	61	1,00	3	3,00	4	4	4	4	3	3	2	2	2	4	4	4	25,00	41,67	75,00	25,00	1,00	4,00	4,00	4,00	1,99	1,00	0,00	0,00	0,00	4,00	1,00	5,00	1,00	-3,53	1,00	5,00	1,00	-2,83	4,00	4,00	3,00	0,98	0,96
1	69	1,00	1	5,00	5	4	4	3	2	2	1	1	1	4	4	4	16,67	66,67	100,00	25,00	0,00	4,00	4,00	2,00	0,99	2,00	0,00	0,00	0,00	4,00	4,00	2,00	3,00	0,32	3,00	4,00	2,00	-1,25	4,00	4,00	4,00	1,32	0,46
2	66	1,00	2	3,00	1	1	1	5	5	5	5	5	5	5	5	5	100,00	0,00	0,00	0,00	0,00	2,00	3,00	2,00	-0,24	5,00	0,00	0,00	1,00	1,00	5,00	1,00	5,00	2,26	5,00	1,00	5,00	1,85	1,00	1,00	1,00	-1,72	1,21
1	43	3,00	3	3,00	5	4	4	1	1	1	1	2	2	2	4	3	16,67	100,00	83,33	50,00	0,00	4,00	4,00	2,00	0,99	3,00	0,00	1,00	0,00	4,00	3,00	3,00	3,00	-0,64	3,00	3,00	3,00	-0,49	4,00	4,00	3,00	0,98	1,11
1	65	1,00	1	3,00	2	2	2	4	4	4	4	4	4	4	4	4	75,00	25,00	25,00	25,00	0,00	2,00	2,00	2,00	-0,74	3,00	0,00	0,00	0,00	3,00	3,00	3,00	3,00	-0,64	3,00	3,00	3,00	-0,49	3,00	3,00	3,00	0,30	1,56
1	22	1,00	1	4,00	4	3	3	5	1	2	1	4	2	3	4	4	41,67	58,33	66,67	33,33	0,00	4,00	4,00	5,00	2,49	3,00	0,00	0,00	1,00	1,00	4,00	3,00	2,00	-0,58	3,00	4,00	4,00	-0,42	1,00	1,00	1,00	-1,72	0,93
2	61	1,00	4	3,00	5	4	5	4	4	4	2	2	2	4	4	4	8,33	25,00	75,00	25,00	1,00	1,00	3,00	2,00	-0,61	2,00	0,00	0,00	0,00	3,00	5,00	1,00	3,00	1,28	4,00	1,00	5,00	1,44	1,00	2,00	4,00	-0,38	1,13
1	39	3,00	2	4,00	3	3	3	3	2	2	2	2	3	2	3	3	50,00	66,67	66,67	58,33	0,00	3,00	3,00	3,00	0,62	2,00	0,00	1,00	1,00	4,00	3,00	2,00	3,00	-0,22	3,00	2,00	4,00	0,27	4,00	4,00	4,00	1,32	0,71
2	35	2,00	2	2,00	3	2	2	2	2	2	2	2	2	4	4	4	66,67	75,00	75,00	25,00	0,00	4,00	1,00	1,00	-1,01	3,00	0,00	0,00	0,00	2,00	5,00	2,00	4,00	1,35	5,00	2,00	4,00	1,10	2,00	2,00	3,00	-0,37	0,80
1	37	2,00	4	4,00	5	4	4	5	5	5	2	2	2	4	4	4	16,67	0,00	75,00	25,00	0,00	1,00	3,00	1,00	-1,11	2,00	0,00	1,00	0,00	2,00	4,00	3,00	4,00	0,39	5,00	2,00	5,00	1,51	1,00	1,00	1,00	-1,72	0,66
2	22	1,00	2	2,00	2	1	2	4	3	3	2	4	3	4	3	3	83,33	41,67	50,00	41,67	1,00	3,00	2,00	2,00	-0,38	2,00	1,00	0,00	0,00	1,00	3,00	3,00	3,00	-0,64	4,00	2,00	5,00	1,09	2,00	2,00	3,00	-0,37	0,84
1	23	3,00	1	2,00	3	3	3	3	3	3	3	3	3	3	3	3	50,00	50,00	50,00	50,00	0,00	4,00	3,00	3,00	0,99	5,00	0,00	1,00	1,00	3,00	2,00	3,00	2,00	-1,67	2,00	2,00	2,00	-0,97	3,00	3,00	3,00	0,30	1,08
2	32	1,00	1	1,00	4	3	3	4	3	3	1	2	1	4	4	4	41,67	41,67	91,67	25,00	0,00	2,00	4,00	1,00	-0,24	2,00	0,00	0,00	0,00	2,00	4,00	3,00	4,00	0,39	3,00	4,00	3,00	-0,84	3,00	3,00	2,00	-0,04	5,01
1	24	2,00	4	4,00	5	5	5	2	2	2	5	1	1	3	3	3	0,00	75,00	66,67	50,00	0,00	1,00	3,00	3,00	-0,11	5,00	0,00	0,00	0,00	2,00	4,00	2,00	4,00	0,81	4,00	2,00	4,00	0,68	2,00	1,00	4,00	-0,36	0,69
2	31	3,00	3	4,00	4	3	3	3	3	2	2	2	2	5	4	4	41,67	58,33	75,00	16,67	1,00	4,00	3,00	2,00	0,49	2,00	0,00	0,00	0,00	3,00	4,00	3,00	4,00	0,39	4,00	1,00	5,00	1,44	2,00	2,00	3,00	-0,37	0,53
1	55	1,00	1	3,00	4	3	4	4	3	2	2	2	2	4	4	3	33,33	50,00	75,00	33,33	0,00	5,00	3,00	2,00	0,85	3,00	0,00	1,00	0,00	4,00	4,00	2,00	3,00	0,32	4,00	2,00	4,00	0,68	3,00	4,00	3,00	0,63	2,53
2	22	2,00	1	2,00	4	3	3	5	4	4	2	3	1	3	4	3	41,67	16,67	75,00	41,67	0,00	2,00	3,00	1,00	-0,74	5,00	1,00	0,00	0,00	1,00	4,00	2,00	4,00	0,81	3,00	2,00	4,00	0,27	1,00	2,00	3,00	-0,72	1,05
2	53	2,00	1	5,00	4	4	4	4	1	2	1	1	1	2	2	2	25,00	66,67	100,00	75,00	1,00	4,00	5,00	3,00	1,99	5,00	0,00	0,00	0,00	2,00	2,00	4,00	4,00	-1,11	4,00	2,00	4,00	0,68	2,00	2,00	3,00	-0,37	0,72
1	22	3,00	3	2,00	3	3	3	3	3	3	3	3	3	3	3	3	50,00	50,00	50,00	50,00	2,00	2,00	1,00	2,00	-1,25	.	0,00	0,00	0,00	3,00	3,00	3,00	3,00	-0,64	3,00	3,00	3,00	-0,49	3,00	3,00	3,00	0,30	0,67
2	53	2,00	4	1,00	1	1	1	1	1	1	1	1	1	1	1	1	100,00	100,00	100,00	100,00	0,00	3,00	3,00	2,00	0,12	5,00	0,00	1,00	1,00	4,00	4,00	5,00	5,00	0,05	5,00	3,00	5,00	1,16	4,00	5,00	5,00	1,98	3,92
1	55	1,00	1	4,00	4	4	3	5	3	4	2	2	2	4	4	4	33,33	25,00	75,00	25,00	1,00	3,00	2,00	2,00	-0,38	4,00	0,00	0,00	1,00	1,00	4,00	2,00	4,00	0,81	5,00	1,00	5,00	1,85	2,00	1,00	2,00	-1,04	0,92
2	27	1,00	2	4,00	2	1	3	4	4	3	1	2	2	5	4	4	75,00	33,33	83,33	16,67	0,00	3,00	3,00	2,00	0,12	3,00	0,00	1,00	0,00	2,00	4,00	1,00	5,00	1,72	4,00	1,00	5,00	1,44	3,00	4,00	1,00	-0,05	0,72
1	70	1,00	1	3,00	5	4	4	2	2	2	2	2	2	5	5	4	16,67	75,00	75,00	8,33	0,00	1,00	4,00	2,00	-0,11	1,00	0,00	0,00	0,00	4,00	4,00	3,00	4,00	0,39	3,00	3,00	3,00	-0,49	3,00	3,00	3,00	0,30	1,40
2	37	3,00	2	3,00	5	5	5	3	1	1	2	2	2	2	1	3	0,00	83,33	75,00	75,00	0,00	3,00	3,00	3,00	0,62	4,00	0,00	0,00	0,00	3,00	4,00	2,00	3,00	0,32	3,00	3,00	3,00	-0,49	4,00	4,00	4,00	1,32	1,88
1	57	1,00	4	4,00	5	3	4	3	3	2	2	2	2	2	2	2	25,00	58,33	75,00	75,00	0,00	4,00	3,00	2,00	0,49	4,00	0,00	1,00	0,00	4,00	3,00	3,00	4,00	-0,15	4,00	2,00	4,00	0,68	3,00	3,00	2,00	-0,04	0,69
2	43	1,00	3	4,00	5	5	5	4	2	2	2	2	1	2	2	2	0,00	58,33	83,33	75,00	1,00	2,00	4,00	2,00	0,26	2,00	0,00	0,00	0,00	3,00	4,00	2,00	4,00	0,81	2,00	3,00	3,00	-0,90	3,00	2,00	2,00	-0,36	0,39
2	56	2,00	1	4,00	4	4	4	3	4	3	2	2	2	3	3	3	25,00	41,67	75,00	50,00	3,00	4,00	3,00	3,00	0,99	1,00	0,00	0,00	0,00	3,00	4,00	2,00	3,00	0,32	2,00	4,00	2,00	-1,66	3,00	4,00	2,00	0,29	0,89
1	67	2,00	1	4,00	3	3	3	4	3	2	2	2	2	2	3	3	50,00	50,00	75,00	58,33	0,00	4,00	3,00	2,00	0,49	3,00	0,00	0,00	0,00	4,00	3,00	2,00	4,00	0,27	3,00	2,00	4,00	0,27	3,00	3,00	4,00	0,64	0,57
2	32	3,00	4	4,00	5	5	5	3	2	2	1	1	2	1	2	1	0,00	66,67	91,67	91,67	2,00	3,00	4,00	2,00	0,62	3,00	0,00	0,00	1,00	5,00	5,00	1,00	4,00	1,77	1,00	5,00	2,00	-2,42	5,00	5,00	5,00	2,33	0,64
2	72	2,00	3	3,00	4	4	4	5	5	5	5	2	2	5	5	3	25,00	0,00	50,00	16,67	0,00	2,00	1,00	2,00	-1,25	4,00	1,00	0,00	0,00	1,00	3,00	5,00	1,00	-2,45	4,00	3,00	3,00	-0,08	1,00	1,00	2,00	-1,39	0,84
2	39	3,00	3	3,00	4	3	3	2	3	2	2	2	2	4	4	4	41,67	66,67	75,00	25,00	0,00	3,00	3,00	2,00	0,12	4,00	0,00	0,00	1,00	2,00	4,00	1,00	3,00	0,74	4,00	1,00	4,00	1,03	2,00	2,00	2,00	-0,71	1,45
1	46	1,00	5	4,00	5	5	5	4	3	4	2	2	2	4	4	2	0,00	33,33	75,00	41,67	0,00	2,00	4,00	4,00	1,26	3,00	0,00	0,00	0,00	2,00	4,00	3,00	3,00	-0,10	4,00	4,00	4,00	-0,01	2,00	2,00	2,00	-0,71	0,52
1	61	3,00	3	3,00	2	1	1	3	3	3	2	2	2	3	3	4	91,67	50,00	75,00	41,67	1,00	3,00	3,00	2,00	0,12	3,00	0,00	0,00	1,00	4,00	3,00	3,00	3,00	-0,64	3,00	3,00	3,00	-0,49	3,00	3,00	3,00	0,30	0,96
2	70	1,00	1	4,00	4	3	3	4	2	2	2	2	2	3	3	2	41,67	58,33	75,00	58,33	1,00	1,00	2,00	3,00	-0,61	3,00	0,00	0,00	0,00	2,00	4,00	3,00	4,00	0,39	4,00	3,00	3,00	-0,08	3,00	3,00	3,00	0,30	0,49
2	27	1,00	1	2,00	2	2	2	5	5	3	3	2	4	4	5	5	75,00	16,67	50,00	8,33	1,00	2,00	3,00	3,00	0,26	5,00	0,00	0,00	0,00	2,00	4,00	2,00	5,00	1,30	5,00	1,00	5,00	1,85	1,00	1,00	1,00	-1,72	1,05
2	65	2,00	2	3,00	4	1	2	3	2	2	1	1	2	3	3	2	66,67	66,67	91,67	58,33	0,00	1,00	3,00	2,00	-0,61	2,00	0,00	0,00	1,00	5,00	3,00	3,00	4,00	-0,15	4,00	3,00	4,00	0,34	4,00	3,00	3,00	0,65	1,21
2	46	3,00	2	3,00	3	2	2	4	5	3	3	2	3	5	4	4	66,67	25,00	58,33	16,67	1,00	1,00	4,00	1,00	-0,61	4,00	0,00	0,00	0,00	3,00	4,00	2,00	3,00	0,32	4,00	3,00	4,00	0,34	2,00	2,00	3,00	-0,37	1,39
2	52	1,00	5	4,00	4	1	1	4	1	2	2	2	1	3	4	4	75,00	66,67	83,33	33,33	0,00	2,00	2,00	2,00	-0,74	4,00	0,00	0,00	1,00	1,00	3,00	5,00	1,00	-2,45	4,00	3,00	4,00	0,34	1,00	1,00	1,00	-1,72	0,72
1	68	2,00	4	4,00	5	5	5	4	2	3	2	2	1	5	4	2	0,00	50,00	83,33	33,33	0,00	4,00	3,00	2,00	0,49	2,00	0,00	1,00	0,00	4,00	3,00	3,00	3,00	-0,64	2,00	4,00	2,00	-1,66	3,00	4,00	3,00	0,63	0,42
1	26	3,00	3	2,00	5	4	3	4	3	3	1	3	1	2	2	2	25,00	41,67	83,33	75,00	0,00	2,00	3,00	2,00	-0,24	2,00	0,00	0,00	0,00	2,00	3,00	3,00	3,00	-0,64	3,00	3,00	3,00	-0,49	3,00	3,00	4,00	0,64	0,67
2	55	3,00	4	5,00	5	4	4	3	2	2	2	2	2	2	2	2	16,67	66,67	75,00	75,00	0,00	4,00	3,00	3,00	0,99	2,00	0,00	0,00	1,00	3,00	4,00	2,00	4,00	0,81	2,00	2,00	2,00	-0,97	3,00	3,00	3,00	0,30	0,54
1	41	2,00	3	3,00	3	3	3	3	2	3	2	1	3	4	4	4	50,00	58,33	75,00	25,00	1,00	3,00	3,00	3,00	0,62	3,00	0,00	0,00	0,00	4,00	3,00	2,00	3,00	-0,22	4,00	2,00	3,00	0,27	2,00	3,00	2,00	-0,38	1,11
2	53	2,00	5	4,00	4	3	3	4	3	3	2	2	3	4	4	4	41,67	41,67	66,67	25,00	0,00	2,00	3,00	2,00	-0,24	4,00	0,00	0,00	0,00	4,00	3,00	3,00	3,00	-0,64	3,00	2,00	3,00	-0,14	3,00	3,00	3,00	0,30	0,72
2	45	3,00	4	4,00	3	2	2	3	3	3	2	2	2	3	3	3	66,67	50,00	75,00	50,00	0,00	1,00	3,00	2,00	-0,61	3,00	0,00	0,00	0,00	3,00	3,00	3,00	3,00	-0,64	3,00	3,00	3,00	-0,49	2,00	2,00	2,00	-0,71	0,47
2	25	1,00	3	2,00	5	5	5	4	4	3	1	1	1	2	2	3	0,00	33,33	100,00	66,67	2,00	4,00	4,00	4,00	1,99	1,00	0,00	0,00	0,00	2,00	4,00	3,00	4,00	0,39	3,00	4,00	2,00	-1,25	2,00	2,00	2,00	-0,71	0,65
2	23	3,00	1	2,00	2	2	2	4	4	4	2	2	2	4	4	4	75,00	25,00	75,00	25,00	0,00	2,00	4,00	2,00	0,26	3,00	0,00	0,00	0,00	3,00	.	.	.	.	.	.	.	.	3,00	3,00	3,00	0,30	1,05
2	53	1,00	1	4,00	4	3	3	3	2	2	3	2	2	3	4	4	41,67	66,67	66,67	33,33	1,00	2,00	2,00	2,00	-0,74	3,00	0,00	0,00	1,00	2,00	3,00	3,00	4,00	-0,15	3,00	3,00	4,00	-0,08	2,00	3,00	3,00	-0,05	0,89
2	72	1,00	5	3,00	4	4	4	2	3	2	2	2	1	3	3	4	25,00	66,67	83,33	41,67	0,00	4,00	3,00	2,00	0,49	3,00	0,00	0,00	0,00	4,00	3,00	3,00	4,00	-0,15	4,00	2,00	4,00	0,68	2,00	2,00	2,00	-0,71	1,09
1	33	3,00	4	3,00	4	3	3	3	4	2	3	2	3	5	5	4	41,67	50,00	58,33	8,33	0,00	2,00	3,00	3,00	0,26	3,00	0,00	0,00	0,00	4,00	4,00	2,00	4,00	0,81	3,00	2,00	4,00	0,27	3,00	4,00	2,00	0,29	1,82
2	48	2,00	1	5,00	5	4	4	5	4	4	2	2	1	5	5	4	16,67	16,67	83,33	8,33	0,00	1,00	1,00	1,00	-2,11	3,00	0,00	0,00	0,00	3,00	3,00	3,00	3,00	-0,64	4,00	2,00	4,00	0,68	3,00	2,00	3,00	-0,02	0,51
1	33	1,00	5	4,00	5	4	4	1	1	1	2	2	2	2	3	2	16,67	100,00	75,00	66,67	0,00	2,00	3,00	2,00	-0,24	2,00	0,00	0,00	0,00	4,00	3,00	3,00	4,00	-0,15	2,00	3,00	4,00	-0,49	4,00	4,00	4,00	1,32	0,71
2	43	3,00	3	4,00	3	3	3	4	3	3	3	2	2	5	5	4	50,00	41,67	66,67	8,33	0,00	4,00	3,00	3,00	0,99	3,00	0,00	0,00	0,00	3,00	4,00	3,00	4,00	0,39	2,00	4,00	3,00	-1,25	2,00	3,00	2,00	-0,38	0,39
1	27	3,00	1	4,00	1	1	1	1	1	1	1	1	2	1	2	2	100,00	100,00	91,67	83,33	0,00	4,00	5,00	5,00	2,99	.	0,00	0,00	0,00	5,00	5,00	5,00	5,00	0,59	5,00	5,00	5,00	0,47	4,00	5,00	4,00	1,64	0,93
1	30	1,00	1	2,00	3	4	2	2	3	2	2	3	3	2	3	2	50,00	66,67	58,33	66,67	0,00	3,00	4,00	3,00	1,12	.	0,00	0,00	0,00	3,00	1,00	4,00	2,00	-2,62	1,00	4,00	2,00	-2,07	4,00	3,00	2,00	0,31	1,03
1	43	2,00	4	2,00	5	5	5	5	3	3	3	1	1	3	4	3	0,00	33,33	83,33	41,67	0,00	1,00	4,00	4,00	0,89	3,00	0,00	0,00	0,00	3,00	3,00	3,00	3,00	-0,64	2,00	4,00	3,00	-1,25	3,00	3,00	3,00	0,30	0,57
2	55	2,00	4	2,00	4	2	3	4	2	3	2	2	2	3	3	4	50,00	50,00	75,00	41,67	1,00	2,00	2,00	2,00	-0,74	4,00	0,00	0,00	0,00	2,00	3,00	3,00	4,00	-0,15	4,00	3,00	3,00	-0,08	2,00	2,00	1,00	-1,05	0,78
1	39	3,00	1	4,00	3	3	3	3	3	3	3	3	3	3	3	3	50,00	50,00	50,00	50,00	0,00	2,00	2,00	2,00	-0,74	3,00	0,00	1,00	1,00	3,00	3,00	3,00	3,00	-0,64	3,00	3,00	3,00	-0,49	3,00	3,00	3,00	0,30	0,88
2	62	2,00	5	4,00	2	1	1	5	4	3	5	5	3	5	5	4	91,67	25,00	16,67	8,33	1,00	1,00	1,00	2,00	-1,61	5,00	1,00	0,00	0,00	3,00	3,00	3,00	3,00	-0,64	3,00	3,00	3,00	-0,49	2,00	3,00	3,00	-0,05	0,44
2	48	3,00	5	4,00	5	4	4	3	1	2	1	2	2	4	4	4	16,67	75,00	83,33	25,00	0,00	2,00	3,00	2,00	-0,24	3,00	0,00	0,00	0,00	3,00	3,00	3,00	4,00	-0,15	3,00	3,00	3,00	-0,49	4,00	3,00	4,00	0,99	0,51
2	49	1,00	3	5,00	4	4	5	5	4	2	2	3	2	5	5	5	16,67	33,33	66,67	0,00	0,00	1,00	1,00	2,00	-1,61	4,00	1,00	1,00	0,00	1,00	4,00	2,00	3,00	0,32	4,00	1,00	5,00	1,44	2,00	3,00	2,00	-0,38	0,32
2	58	2,00	4	3,00	3	3	3	3	3	3	3	3	3	3	3	3	50,00	50,00	50,00	50,00	0,00	2,00	1,00	2,00	-1,25	2,00	1,00	0,00	0,00	3,00	3,00	3,00	3,00	-0,64	3,00	3,00	3,00	-0,49	3,00	3,00	3,00	0,30	1,83
2	66	2,00	1	5,00	4	4	4	4	3	2	2	2	2	4	4	2	25,00	50,00	75,00	41,67	1,00	1,00	2,00	2,00	-1,11	4,00	1,00	0,00	0,00	4,00	3,00	3,00	3,00	-0,64	3,00	3,00	3,00	-0,49	3,00	3,00	3,00	0,30	0,44
1	75	1,00	1	4,00	5	3	3	5	2	4	1	1	1	3	3	3	33,33	33,33	100,00	50,00	0,00	3,00	3,00	2,00	0,12	3,00	0,00	1,00	0,00	4,00	5,00	1,00	5,00	2,26	3,00	4,00	1,00	-1,66	4,00	4,00	3,00	0,98	0,51
1	61	1,00	5	2,00	5	4	4	4	3	2	2	2	2	3	3	4	16,67	50,00	75,00	41,67	1,00	3,00	3,00	2,00	0,12	2,00	0,00	0,00	0,00	3,00	4,00	2,00	3,00	0,32	4,00	2,00	3,00	0,27	3,00	3,00	3,00	0,30	0,53
1	75	1,00	3	4,00	3	3	3	3	3	3	3	3	3	3	3	3	50,00	50,00	50,00	50,00	1,00	1,00	1,00	2,00	-1,61	3,00	0,00	0,00	1,00	3,00	4,00	4,00	4,00	-0,02	4,00	4,00	4,00	-0,01	3,00	3,00	3,00	0,30	0,31
2	49	1,00	4	4,00	5	4	5	3	4	3	1	1	1	4	3	2	8,33	41,67	100,00	50,00	0,00	2,00	5,00	5,00	2,26	3,00	0,00	0,00	1,00	2,00	4,00	2,00	4,00	0,81	2,00	2,00	3,00	-0,56	3,00	4,00	3,00	0,63	0,47
1	69	1,00	3	5,00	4	3	3	4	2	2	3	2	2	4	4	4	41,67	58,33	66,67	25,00	1,00	3,00	3,00	2,00	0,12	3,00	0,00	0,00	0,00	4,00	4,00	3,00	4,00	0,39	4,00	2,00	4,00	0,68	2,00	4,00	2,00	-0,06	0,28
2	63	2,00	1	4,00	3	3	3	3	3	2	3	2	2	3	3	3	50,00	58,33	66,67	50,00	1,00	4,00	2,00	2,00	-0,01	3,00	0,00	0,00	0,00	4,00	3,00	3,00	3,00	-0,64	3,00	3,00	3,00	-0,49	3,00	5,00	3,00	0,96	0,55
2	23	1,00	2	3,00	3	3	3	3	3	3	3	3	3	3	3	3	50,00	50,00	50,00	50,00	0,00	3,00	3,00	2,00	0,12	3,00	0,00	0,00	0,00	3,00	3,00	3,00	3,00	-0,64	3,00	3,00	3,00	-0,49	3,00	3,00	3,00	0,30	1,97
1	49	3,00	1	4,00	4	3	3	3	3	2	2	2	2	3	3	3	41,67	58,33	75,00	50,00	1,00	2,00	3,00	2,00	-0,24	3,00	0,00	0,00	1,00	3,00	3,00	3,00	3,00	-0,64	3,00	3,00	3,00	-0,49	2,00	2,00	3,00	-0,37	0,65
1	28	3,00	1	4,00	2	1	2	1	2	1	1	1	2	1	2	2	83,33	91,67	91,67	83,33	0,00	5,00	5,00	5,00	3,36	.	0,00	0,00	0,00	5,00	5,00	5,00	5,00	0,59	5,00	5,00	5,00	0,47	5,00	5,00	4,00	1,99	0,93
2	51	3,00	4	2,00	3	2	3	3	2	2	2	2	4	5	4	3	58,33	66,67	58,33	25,00	0,00	3,00	2,00	3,00	0,12	3,00	0,00	0,00	0,00	4,00	3,00	3,00	3,00	-0,64	3,00	3,00	3,00	-0,49	2,00	2,00	2,00	-0,71	0,78
2	46	2,00	5	1,00	3	3	3	5	3	5	3	3	3	5	5	1	50,00	16,67	50,00	33,33	0,00	4,00	5,00	5,00	2,99	1,00	0,00	0,00	0,00	3,00	5,00	1,00	5,00	2,26	5,00	1,00	5,00	1,85	3,00	3,00	3,00	0,30	2,98
2	47	3,00	1	4,00	5	4	4	5	4	4	1	1	1	4	4	3	16,67	16,67	100,00	33,33	1,00	2,00	2,00	2,00	-0,74	2,00	0,00	0,00	1,00	2,00	5,00	2,00	4,00	1,35	4,00	4,00	3,00	-0,42	2,00	2,00	2,00	-0,71	0,63
1	48	3,00	1	5,00	5	5	5	2	2	1	1	1	1	3	4	1	0,00	83,33	100,00	58,33	0,00	3,00	2,00	2,00	-0,38	3,00	0,00	0,00	0,00	4,00	4,00	3,00	4,00	0,39	3,00	3,00	3,00	-0,49	3,00	3,00	3,00	0,30	0,53
1	28	1,00	3	3,00	4	4	3	3	3	3	2	2	2	3	3	3	33,33	50,00	75,00	50,00	1,00	4,00	4,00	5,00	2,49	1,00	0,00	0,00	0,00	3,00	2,00	2,00	3,00	-0,76	2,00	2,00	3,00	-0,56	3,00	3,00	3,00	0,30	1,58
1	67	1,00	3	4,00	3	2	2	5	4	3	4	3	4	5	4	4	66,67	25,00	33,33	16,67	0,00	2,00	2,00	2,00	-0,74	3,00	0,00	0,00	0,00	2,00	3,00	3,00	3,00	-0,64	3,00	3,00	3,00	-0,49	2,00	2,00	2,00	-0,71	0,35
1	70	1,00	2	3,00	5	5	5	3	2	2	1	1	1	3	4	4	0,00	66,67	100,00	33,33	0,00	2,00	3,00	2,00	-0,24	3,00	0,00	0,00	0,00	4,00	4,00	2,00	4,00	0,81	4,00	2,00	3,00	0,27	3,00	4,00	3,00	0,63	1,12
2	67	2,00	1	4,00	4	4	4	4	2	2	2	2	2	4	3	4	25,00	58,33	75,00	33,33	0,00	2,00	2,00	2,00	-0,74	5,00	0,00	0,00	0,00	3,00	3,00	2,00	3,00	-0,22	1,00	5,00	1,00	-2,83	3,00	2,00	3,00	-0,02	0,55
1	68	1,00	1	4,00	3	3	2	5	3	2	4	4	2	4	5	5	58,33	41,67	41,67	8,33	0,00	1,00	2,00	2,00	-1,11	5,00	0,00	0,00	0,00	2,00	2,00	4,00	2,00	-2,08	4,00	2,00	4,00	0,68	1,00	1,00	2,00	-1,39	0,57
1	45	3,00	5	2,00	5	5	5	5	2	2	1	1	1	3	3	1	0,00	50,00	100,00	66,67	2,00	2,00	3,00	2,00	-0,24	4,00	0,00	1,00	0,00	3,00	4,00	2,00	3,00	0,32	1,00	4,00	2,00	-2,07	2,00	3,00	4,00	0,29	0,61
1	29	2,00	5	5,00	5	5	5	3	2	4	1	1	1	1	1	1	0,00	50,00	100,00	100,00	1,00	2,00	3,00	3,00	0,26	1,00	0,00	0,00	0,00	5,00	4,00	2,00	4,00	0,81	1,00	5,00	1,00	-2,83	5,00	5,00	4,00	1,99	0,60
2	42	1,00	5	3,00	5	5	5	3	1	1	1	1	1	1	1	1	0,00	83,33	100,00	100,00	0,00	4,00	4,00	4,00	1,99	3,00	0,00	0,00	0,00	5,00	4,00	1,00	4,00	1,23	3,00	4,00	3,00	-0,84	4,00	5,00	4,00	1,64	1,40
1	66	1,00	4	4,00	4	4	4	3	1	1	1	2	1	1	1	1	25,00	83,33	91,67	100,00	0,00	5,00	2,00	1,00	-0,15	1,00	0,00	0,00	0,00	5,00	3,00	3,00	3,00	-0,64	1,00	5,00	1,00	-2,83	5,00	5,00	5,00	2,33	0,42
2	22	1,00	1	2,00	2	1	1	5	5	4	1	5	5	4	3	4	91,67	8,33	33,33	33,33	0,00	2,00	4,00	4,00	1,26	4,00	0,00	0,00	0,00	2,00	4,00	3,00	3,00	-0,10	4,00	2,00	4,00	0,68	1,00	1,00	2,00	-1,39	1,05
1	72	1,00	1	3,00	5	3	5	5	5	5	2	2	2	4	4	4	16,67	0,00	75,00	25,00	0,00	4,00	2,00	2,00	-0,01	3,00	0,00	0,00	0,00	2,00	4,00	3,00	3,00	-0,10	3,00	3,00	3,00	-0,49	1,00	1,00	1,00	-1,72	1,40
2	48	1,00	4	3,00	2	2	2	3	3	3	2	2	4	3	3	3	75,00	50,00	58,33	50,00	0,00	1,00	2,00	3,00	-0,61	4,00	0,00	0,00	1,00	4,00	3,00	3,00	3,00	-0,64	3,00	3,00	3,00	-0,49	4,00	4,00	4,00	1,32	1,30
2	54	2,00	3	1,00	3	2	2	4	2	2	3	2	2	3	3	4	66,67	58,33	66,67	41,67	0,00	1,00	1,00	3,00	-1,11	4,00	1,00	0,00	0,00	2,00	3,00	3,00	3,00	-0,64	4,00	3,00	4,00	0,34	2,00	3,00	3,00	-0,05	3,24
1	33	1,00	1	5,00	5	4	4	4	3	2	1	1	1	3	2	2	16,67	50,00	100,00	66,67	0,00	3,00	4,00	2,00	0,62	3,00	0,00	0,00	0,00	2,00	3,00	3,00	2,00	-1,12	4,00	3,00	3,00	-0,08	2,00	2,00	3,00	-0,37	0,71
1	34	2,00	3	1,00	2	1	1	5	5	5	2	5	5	5	5	3	91,67	0,00	25,00	16,67	0,00	5,00	3,00	1,00	0,35	3,00	0,00	1,00	1,00	4,00	4,00	2,00	4,00	0,81	2,00	3,00	3,00	-0,90	2,00	1,00	2,00	-1,04	3,21
2	66	1,00	1	3,00	5	5	5	5	2	3	1	1	1	5	2	2	0,00	41,67	100,00	50,00	2,00	2,00	3,00	2,00	-0,24	4,00	0,00	0,00	0,00	1,00	3,00	3,00	4,00	-0,15	5,00	1,00	1,00	0,21	1,00	1,00	1,00	-1,72	1,51
2	63	1,00	5	5,00	1	1	1	5	5	5	5	5	5	5	5	5	100,00	0,00	0,00	0,00	0,00	1,00	2,00	2,00	-1,11	4,00	0,00	0,00	1,00	1,00	4,00	2,00	3,00	0,32	5,00	1,00	5,00	1,85	1,00	1,00	1,00	-1,72	0,36
1	44	1,00	3	3,00	4	4	2	4	4	3	4	1	2	5	5	4	41,67	33,33	66,67	8,33	0,00	4,00	3,00	2,00	0,49	2,00	0,00	0,00	0,00	4,00	4,00	2,00	4,00	0,81	4,00	2,00	4,00	0,68	3,00	3,00	3,00	0,30	1,11
2	60	1,00	1	4,00	4	3	2	2	4	4	2	2	2	4	4	3	50,00	41,67	75,00	33,33	1,00	2,00	4,00	3,00	0,76	4,00	0,00	1,00	1,00	3,00	4,00	2,00	4,00	0,81	4,00	3,00	4,00	0,34	2,00	2,00	2,00	-0,71	0,55
2	65	1,00	2	4,00	5	4	3	3	2	2	1	1	1	2	2	3	25,00	66,67	100,00	66,67	2,00	3,00	4,00	2,00	0,62	3,00	0,00	0,00	0,00	4,00	4,00	3,00	4,00	0,39	3,00	3,00	4,00	-0,08	4,00	4,00	3,00	0,98	0,44
2	64	2,00	4	3,00	4	3	2	3	3	2	2	2	2	3	3	3	50,00	58,33	75,00	50,00	2,00	1,00	2,00	1,00	-1,61	3,00	0,00	0,00	0,00	4,00	3,00	3,00	3,00	-0,64	2,00	3,00	2,00	-1,31	4,00	4,00	4,00	1,32	1,13
2	52	3,00	1	4,00	3	3	3	3	3	3	2	2	3	4	4	4	50,00	50,00	66,67	25,00	0,00	1,00	2,00	2,00	-1,11	1,00	0,00	0,00	0,00	3,00	3,00	3,00	3,00	-0,64	3,00	3,00	3,00	-0,49	4,00	4,00	3,00	0,98	0,89
2	43	1,00	1	4,00	3	1	1	5	5	5	5	3	2	5	5	5	83,33	0,00	41,67	0,00	1,00	1,00	2,00	2,00	-1,11	5,00	0,00	1,00	0,00	2,00	4,00	3,00	3,00	-0,10	5,00	1,00	4,00	1,44	1,00	2,00	1,00	-1,40	0,63
2	65	2,00	2	5,00	3	2	3	1	3	3	4	3	3	5	5	5	58,33	66,67	41,67	0,00	1,00	1,00	1,00	1,00	-2,11	5,00	1,00	0,00	0,00	2,00	3,00	1,00	1,00	-0,78	5,00	1,00	5,00	1,85	1,00	1,00	2,00	-1,39	0,35
1	42	2,00	1	1,00	3	3	3	4	2	2	2	2	3	5	5	2	50,00	58,33	66,67	25,00	0,00	4,00	3,00	2,00	0,49	2,00	0,00	0,00	0,00	3,00	3,00	3,00	3,00	-0,64	4,00	2,00	4,00	0,68	5,00	5,00	5,00	2,33	3,82
2	63	2,00	2	4,00	3	3	3	5	5	4	4	1	1	5	5	5	50,00	8,33	75,00	0,00	0,00	2,00	2,00	3,00	-0,25	3,00	0,00	0,00	1,00	1,00	3,00	3,00	3,00	-0,64	5,00	1,00	5,00	1,85	1,00	1,00	1,00	-1,72	0,44
1	66	1,00	2	4,00	3	3	3	3	3	3	3	3	3	3	3	3	50,00	50,00	50,00	50,00	1,00	1,00	1,00	2,00	-1,61	5,00	1,00	0,00	0,00	3,00	3,00	3,00	3,00	-0,64	3,00	3,00	3,00	-0,49	3,00	3,00	3,00	0,30	0,45
1	45	2,00	3	3,00	5	4	4	3	4	3	1	1	2	2	2	3	16,67	41,67	91,67	66,67	0,00	3,00	2,00	2,00	-0,38	1,00	0,00	0,00	0,00	4,00	3,00	3,00	3,00	-0,64	2,00	3,00	3,00	-0,90	5,00	5,00	4,00	1,99	1,11
1	25	2,00	3	1,00	1	1	2	5	5	5	5	4	4	5	5	5	91,67	0,00	16,67	0,00	0,00	1,00	1,00	2,00	-1,61	5,00	0,00	0,00	0,00	1,00	5,00	3,00	5,00	1,42	5,00	2,00	5,00	1,51	1,00	1,00	1,00	-1,72	3,37
1	49	3,00	4	3,00	3	2	2	4	3	2	2	2	2	3	3	2	66,67	50,00	75,00	58,33	1,00	2,00	4,00	2,00	0,26	2,00	0,00	1,00	0,00	4,00	4,00	2,00	4,00	0,81	4,00	2,00	4,00	0,68	3,00	3,00	3,00	0,30	1,34
2	65	1,00	4	4,00	5	3	3	3	2	2	2	2	2	2	2	2	33,33	66,67	75,00	75,00	0,00	3,00	2,00	2,00	-0,38	3,00	0,00	0,00	0,00	4,00	3,00	3,00	3,00	-0,64	3,00	3,00	3,00	-0,49	3,00	3,00	3,00	0,30	0,41
2	45	3,00	3	5,00	4	4	4	4	2	2	2	2	2	4	4	3	25,00	58,33	75,00	33,33	1,00	2,00	2,00	2,00	-0,74	4,00	0,00	0,00	0,00	2,00	3,00	3,00	3,00	-0,64	4,00	2,00	4,00	0,68	2,00	2,00	3,00	-0,37	0,32
2	36	3,00	1	4,00	4	4	4	4	2	2	2	2	2	5	4	4	25,00	58,33	75,00	16,67	2,00	5,00	1,00	2,00	-0,15	3,00	1,00	0,00	0,00	2,00	4,00	2,00	4,00	0,81	4,00	2,00	4,00	0,68	2,00	4,00	2,00	-0,06	0,85
1	66	1,00	2	4,00	3	3	4	3	2	2	2	2	4	3	4	2	41,67	66,67	58,33	50,00	0,00	3,00	2,00	2,00	-0,38	3,00	0,00	0,00	0,00	3,00	3,00	2,00	4,00	0,27	3,00	4,00	3,00	-0,84	2,00	3,00	3,00	-0,05	0,45
1	55	2,00	1	3,00	5	5	5	2	3	3	1	1	1	3	3	3	0,00	58,33	100,00	50,00	0,00	4,00	3,00	3,00	0,99	3,00	0,00	0,00	1,00	3,00	4,00	4,00	4,00	-0,02	3,00	3,00	3,00	-0,49	3,00	3,00	1,00	-0,37	2,53
1	64	1,00	3	3,00	4	3	4	4	5	5	2	4	2	5	5	4	33,33	8,33	58,33	8,33	0,00	3,00	4,00	2,00	0,62	3,00	0,00	0,00	1,00	3,00	4,00	3,00	4,00	0,39	3,00	2,00	3,00	-0,14	2,00	2,00	1,00	-1,05	0,96
1	45	2,00	5	4,00	5	3	3	4	3	3	2	2	2	4	3	4	33,33	41,67	75,00	33,33	1,00	3,00	3,00	2,00	0,12	2,00	0,00	0,00	0,00	3,00	5,00	2,00	4,00	1,35	4,00	4,00	3,00	-0,42	2,00	3,00	2,00	-0,38	0,52
2	69	1,00	4	4,00	5	4	4	4	2	2	1	1	1	4	2	2	16,67	58,33	100,00	58,33	0,00	3,00	3,00	2,00	0,12	3,00	0,00	0,00	0,00	2,00	4,00	2,00	3,00	0,32	3,00	2,00	4,00	0,27	4,00	4,00	2,00	0,64	0,41
2	42	3,00	2	3,00	1	2	1	5	5	5	5	3	3	5	5	5	91,67	0,00	33,33	0,00	0,00	2,00	3,00	2,00	-0,24	4,00	0,00	1,00	0,00	2,00	5,00	1,00	5,00	2,26	3,00	3,00	4,00	-0,08	1,00	1,00	1,00	-1,72	1,39
2	64	1,00	3	4,00	5	4	4	5	5	3	3	2	2	5	5	5	16,67	16,67	66,67	0,00	1,00	3,00	3,00	2,00	0,12	4,00	0,00	1,00	0,00	2,00	4,00	2,00	2,00	-0,17	3,00	3,00	3,00	-0,49	1,00	1,00	2,00	-1,39	0,34
2	70	1,00	1	4,00	5	1	1	4	3	2	1	1	1	3	3	3	66,67	50,00	100,00	50,00	0,00	5,00	2,00	2,00	0,35	3,00	0,00	0,00	1,00	3,00	4,00	2,00	4,00	0,81	4,00	2,00	3,00	0,27	2,00	2,00	2,00	-0,71	0,49
2	47	3,00	3	3,00	4	4	4	4	4	2	2	1	2	4	4	4	25,00	41,67	83,33	25,00	1,00	3,00	3,00	3,00	0,62	2,00	0,00	0,00	0,00	3,00	2,00	2,00	4,00	-0,27	3,00	3,00	3,00	-0,49	2,00	2,00	2,00	-0,71	1,07
2	66	2,00	2	4,00	4	4	4	4	3	3	2	2	2	3	3	3	25,00	41,67	75,00	50,00	0,00	3,00	2,00	1,00	-0,88	2,00	0,00	0,00	0,00	4,00	4,00	1,00	3,00	0,74	4,00	2,00	3,00	0,27	2,00	3,00	2,00	-0,38	0,44
2	43	3,00	4	3,00	5	5	5	2	2	1	1	1	1	3	3	2	0,00	83,33	100,00	58,33	0,00	2,00	2,00	3,00	-0,25	2,00	0,00	0,00	0,00	3,00	4,00	2,00	4,00	0,81	4,00	2,00	4,00	0,68	4,00	4,00	4,00	1,32	1,30
1	68	1,00	2	3,00	3	3	3	4	4	2	4	4	3	4	3	4	50,00	41,67	33,33	33,33	1,00	4,00	3,00	2,00	0,49	4,00	0,00	0,00	1,00	2,00	3,00	3,00	3,00	-0,64	3,00	2,00	4,00	0,27	3,00	3,00	3,00	0,30	1,25
1	63	1,00	3	4,00	5	5	5	3	2	2	1	1	1	2	2	2	0,00	66,67	100,00	75,00	1,00	4,00	3,00	3,00	0,99	2,00	0,00	1,00	0,00	3,00	2,00	3,00	1,00	-2,15	4,00	2,00	3,00	0,27	3,00	4,00	2,00	0,29	0,35
2	37	1,00	5	4,00	1	1	1	5	5	3	4	5	5	5	5	5	100,00	16,67	8,33	0,00	0,00	1,00	1,00	1,00	-2,11	3,00	1,00	0,00	0,00	3,00	3,00	3,00	3,00	-0,64	3,00	3,00	3,00	-0,49	1,00	1,00	3,00	-1,05	0,69
2	23	1,00	1	2,00	3	2	2	3	4	3	2	2	3	4	2	3	66,67	41,67	66,67	50,00	1,00	4,00	4,00	5,00	2,49	.	0,00	0,00	1,00	2,00	.	.	.	.	.	.	.	.	3,00	4,00	4,00	0,97	1,05
1	75	2,00	1	4,00	5	4	4	3	2	2	1	1	1	2	3	3	16,67	66,67	100,00	58,33	2,00	4,00	3,00	2,00	0,49	3,00	0,00	0,00	1,00	3,00	4,00	2,00	4,00	0,81	4,00	2,00	4,00	0,68	3,00	3,00	3,00	0,30	0,51
2	28	3,00	5	1,00	1	1	1	5	5	5	5	5	5	5	5	5	100,00	0,00	0,00	0,00	0,00	3,00	2,00	2,00	-0,38	5,00	1,00	0,00	1,00	5,00	5,00	1,00	5,00	2,26	5,00	1,00	5,00	1,85	1,00	1,00	1,00	-1,72	4,24
2	36	3,00	4	4,00	3	2	5	2	1	2	3	1	1	2	2	2	41,67	83,33	83,33	75,00	0,00	2,00	4,00	3,00	0,76	2,00	0,00	0,00	0,00	2,00	3,00	2,00	4,00	0,27	5,00	1,00	5,00	1,85	2,00	2,00	2,00	-0,71	0,64
2	67	1,00	1	4,00	4	2	4	4	4	3	1	1	1	4	4	4	41,67	33,33	100,00	25,00	1,00	2,00	4,00	2,00	0,26	3,00	0,00	0,00	0,00	3,00	4,00	3,00	3,00	-0,10	4,00	4,00	4,00	-0,01	3,00	3,00	2,00	-0,04	0,55
2	56	1,00	4	4,00	1	1	1	5	4	5	2	2	2	5	5	3	100,00	8,33	75,00	16,67	1,00	2,00	2,00	2,00	-0,74	3,00	0,00	0,00	1,00	2,00	4,00	2,00	4,00	0,81	4,00	2,00	4,00	0,68	1,00	1,00	1,00	-1,72	0,67
1	58	1,00	4	4,00	4	4	4	4	3	3	2	2	2	5	5	4	25,00	41,67	75,00	8,33	0,00	2,00	3,00	3,00	0,26	4,00	0,00	0,00	0,00	3,00	3,00	3,00	3,00	-0,64	3,00	3,00	3,00	-0,49	2,00	4,00	2,00	-0,06	0,69
1	42	1,00	4	4,00	5	5	5	2	3	1	2	1	1	3	3	4	0,00	75,00	91,67	41,67	0,00	2,00	2,00	2,00	-0,74	4,00	0,00	1,00	0,00	1,00	2,00	4,00	2,00	-2,08	5,00	1,00	5,00	1,85	1,00	1,00	2,00	-1,39	0,49
1	68	1,00	3	3,00	3	2	2	4	5	5	3	2	2	4	5	4	66,67	8,33	66,67	16,67	0,00	3,00	3,00	2,00	0,12	4,00	0,00	0,00	0,00	3,00	2,00	3,00	2,00	-1,67	4,00	2,00	4,00	0,68	2,00	1,00	2,00	-1,04	0,96
1	34	1,00	4	5,00	5	5	5	4	2	4	1	1	1	1	1	2	0,00	41,67	100,00	91,67	0,00	3,00	3,00	3,00	0,62	2,00	0,00	0,00	0,00	4,00	5,00	2,00	4,00	1,35	3,00	4,00	2,00	-1,25	4,00	5,00	4,00	1,64	0,53
1	48	3,00	4	4,00	5	5	5	3	2	1	3	1	2	3	1	2	0,00	75,00	75,00	75,00	0,00	3,00	3,00	2,00	0,12	3,00	0,00	0,00	0,00	2,00	4,00	2,00	4,00	0,81	4,00	4,00	4,00	-0,01	2,00	4,00	4,00	0,62	0,49
2	42	2,00	1	4,00	4	4	3	4	3	2	2	2	2	4	4	4	33,33	50,00	75,00	25,00	0,00	2,00	2,00	2,00	-0,74	4,00	0,00	0,00	0,00	2,00	4,00	2,00	3,00	0,32	4,00	3,00	4,00	0,34	2,00	2,00	2,00	-0,71	0,63
2	52	3,00	1	4,00	4	3	3	3	3	3	1	1	1	4	4	4	41,67	50,00	100,00	25,00	1,00	2,00	1,00	2,00	-1,25	5,00	1,00	0,00	1,00	3,00	4,00	2,00	3,00	0,32	4,00	2,00	4,00	0,68	1,00	2,00	2,00	-1,06	0,89
2	20	3,00	4	1,00	2	3	2	4	3	3	3	2	2	3	4	4	66,67	41,67	66,67	33,33	0,00	3,00	4,00	3,00	1,12	3,00	0,00	1,00	1,00	4,00	4,00	1,00	5,00	1,72	4,00	2,00	4,00	0,68	2,00	2,00	2,00	-0,71	3,95
2	58	1,00	1	1,00	4	3	3	5	4	3	5	5	5	5	5	5	41,67	25,00	0,00	0,00	0,00	4,00	3,00	2,00	0,49	5,00	0,00	0,00	0,00	2,00	3,00	3,00	3,00	-0,64	2,00	2,00	4,00	-0,14	2,00	3,00	3,00	-0,05	5,22
2	31	2,00	3	4,00	3	2	2	5	5	4	3	3	3	5	5	5	66,67	8,33	50,00	0,00	1,00	2,00	2,00	3,00	-0,25	3,00	0,00	0,00	0,00	3,00	3,00	3,00	3,00	-0,64	4,00	4,00	4,00	-0,01	2,00	3,00	3,00	-0,05	0,53
2	36	3,00	1	4,00	3	2	2	5	4	3	2	2	2	5	5	5	66,67	25,00	75,00	0,00	2,00	5,00	5,00	4,00	2,86	3,00	0,00	0,00	0,00	2,00	4,00	2,00	4,00	0,81	4,00	2,00	4,00	0,68	2,00	2,00	2,00	-0,71	0,85
1	35	3,00	1	5,00	5	5	5	2	1	1	1	1	1	3	3	3	0,00	91,67	100,00	50,00	0,00	2,00	3,00	3,00	0,26	3,00	0,00	0,00	0,00	4,00	3,00	3,00	3,00	-0,64	3,00	3,00	3,00	-0,49	4,00	3,00	4,00	0,99	0,71
2	29	1,00	4	5,00	3	3	3	4	2	3	4	2	2	4	4	3	50,00	50,00	58,33	33,33	0,00	2,00	3,00	3,00	0,26	4,00	0,00	0,00	0,00	3,00	4,00	2,00	4,00	0,81	4,00	2,00	4,00	0,68	2,00	2,00	3,00	-0,37	0,54
2	47	3,00	1	5,00	5	3	4	4	2	3	1	1	1	3	2	3	25,00	50,00	100,00	58,33	0,00	1,00	3,00	3,00	-0,11	2,00	0,00	0,00	0,00	3,00	4,00	2,00	4,00	0,81	4,00	1,00	4,00	1,03	2,00	2,00	2,00	-0,71	0,51
1	72	1,00	1	4,00	3	3	2	5	3	3	2	2	2	3	3	3	58,33	33,33	75,00	50,00	0,00	3,00	3,00	2,00	0,12	2,00	0,00	0,00	0,00	3,00	3,00	3,00	3,00	-0,64	2,00	4,00	3,00	-1,25	3,00	3,00	4,00	0,64	0,51
1	26	1,00	4	4,00	3	3	3	4	4	2	3	3	3	3	3	4	50,00	41,67	50,00	41,67	1,00	2,00	2,00	2,00	-0,74	4,00	0,00	0,00	0,00	3,00	4,00	4,00	4,00	-0,02	4,00	4,00	4,00	-0,01	3,00	4,00	4,00	0,97	0,69
1	71	1,00	2	3,00	5	2	5	3	1	1	1	1	2	3	3	2	25,00	83,33	91,67	58,33	0,00	4,00	4,00	2,00	0,99	1,00	0,00	0,00	0,00	3,00	3,00	3,00	3,00	-0,64	1,00	5,00	1,00	-2,83	5,00	5,00	5,00	2,33	1,12
1	69	1,00	2	1,00	4	4	4	4	3	3	1	1	2	3	3	3	25,00	41,67	91,67	50,00	2,00	3,00	3,00	2,00	0,12	3,00	0,00	0,00	0,00	3,00	4,00	2,00	4,00	0,81	3,00	3,00	3,00	-0,49	3,00	3,00	3,00	0,30	2,66
1	20	2,00	4	2,00	5	3	4	3	2	2	1	1	1	3	2	1	25,00	66,67	100,00	75,00	0,00	4,00	3,00	2,00	0,49	2,00	0,00	0,00	0,00	4,00	4,00	2,00	4,00	0,81	3,00	2,00	4,00	0,27	3,00	4,00	5,00	1,31	0,81
1	30	3,00	4	2,00	5	5	5	1	2	2	1	1	1	1	1	2	0,00	83,33	100,00	91,67	2,00	3,00	4,00	3,00	1,12	4,00	0,00	0,00	0,00	4,00	4,00	3,00	3,00	-0,10	4,00	1,00	4,00	1,03	3,00	4,00	4,00	0,97	0,77
1	70	1,00	4	4,00	3	3	3	3	3	3	3	2	2	3	3	3	50,00	50,00	66,67	50,00	1,00	1,00	3,00	2,00	-0,61	3,00	0,00	0,00	0,00	3,00	3,00	3,00	3,00	-0,64	.	.	.	.	3,00	4,00	2,00	0,29	0,38
1	39	3,00	1	4,00	3	2	3	3	3	3	2	2	2	3	3	3	58,33	50,00	75,00	50,00	2,00	3,00	3,00	2,00	0,12	3,00	0,00	0,00	1,00	2,00	3,00	3,00	3,00	-0,64	4,00	2,00	4,00	0,68	2,00	2,00	2,00	-0,71	0,88
2	63	1,00	5	5,00	1	1	3	4	4	3	2	2	3	4	4	4	83,33	33,33	66,67	25,00	0,00	1,00	2,00	2,00	-1,11	5,00	0,00	1,00	0,00	2,00	3,00	3,00	3,00	-0,64	3,00	3,00	3,00	-0,49	2,00	2,00	2,00	-0,71	0,36
2	51	3,00	4	3,00	4	4	4	4	2	2	1	1	1	4	4	3	25,00	58,33	100,00	33,33	1,00	1,00	3,00	3,00	-0,11	3,00	0,00	0,00	0,00	3,00	3,00	3,00	3,00	-0,64	4,00	3,00	4,00	0,34	3,00	3,00	3,00	0,30	1,83
2	31	3,00	3	3,00	2	2	2	5	4	4	2	2	2	5	5	4	75,00	16,67	75,00	8,33	1,00	2,00	4,00	4,00	1,26	4,00	0,00	1,00	0,00	2,00	4,00	1,00	4,00	1,23	4,00	2,00	4,00	0,68	1,00	1,00	2,00	-1,39	1,45
1	27	3,00	1	2,00	5	2	2	3	2	1	1	1	1	4	1	2	50,00	75,00	100,00	66,67	0,00	3,00	4,00	4,00	1,62	5,00	0,00	0,00	0,00	3,00	4,00	2,00	3,00	0,32	4,00	2,00	4,00	0,68	2,00	2,00	3,00	-0,37	1,08
1	49	2,00	4	1,00	3	2	3	3	3	3	2	2	3	3	2	2	58,33	50,00	66,67	66,67	1,00	3,00	3,00	3,00	0,62	4,00	0,00	1,00	0,00	4,00	3,00	3,00	4,00	-0,15	4,00	2,00	4,00	0,68	2,00	3,00	2,00	-0,38	2,87
1	42	3,00	4	3,00	5	1	5	3	3	1	1	1	1	2	2	2	33,33	66,67	100,00	75,00	0,00	3,00	3,00	3,00	0,62	1,00	0,00	1,00	0,00	4,00	4,00	1,00	5,00	1,72	4,00	2,00	5,00	1,09	4,00	4,00	3,00	0,98	1,34
1	72	1,00	1	5,00	4	3	3	5	4	4	3	3	2	5	5	4	41,67	16,67	58,33	8,33	1,00	2,00	3,00	3,00	0,26	5,00	0,00	0,00	0,00	2,00	3,00	3,00	2,00	-1,12	4,00	2,00	4,00	0,68	1,00	1,00	1,00	-1,72	0,41
1	59	1,00	1	4,00	4	3	4	2	2	2	3	2	2	2	3	3	33,33	75,00	66,67	58,33	0,00	3,00	3,00	3,00	0,62	1,00	0,00	0,00	0,00	3,00	4,00	3,00	3,00	-0,10	3,00	3,00	3,00	-0,49	4,00	3,00	4,00	0,99	0,92
2	54	3,00	3	2,00	4	4	4	1	2	1	1	1	1	5	3	4	25,00	91,67	100,00	25,00	0,00	2,00	2,00	2,00	-0,74	3,00	0,00	0,00	0,00	3,00	3,00	3,00	3,00	-0,64	4,00	2,00	4,00	0,68	4,00	4,00	3,00	0,98	0,64
2	34	3,00	1	3,00	3	2	2	4	2	2	2	2	2	3	3	2	66,67	58,33	75,00	58,33	1,00	4,00	3,00	3,00	0,99	5,00	0,00	0,00	0,00	1,00	2,00	3,00	3,00	-1,18	5,00	1,00	5,00	1,85	1,00	1,00	1,00	-1,72	2,34
1	38	3,00	1	4,00	2	2	2	2	2	1	2	1	2	3	2	2	75,00	83,33	83,33	66,67	2,00	2,00	4,00	3,00	0,76	3,00	0,00	0,00	0,00	3,00	3,00	2,00	4,00	0,27	3,00	1,00	4,00	0,62	2,00	2,00	3,00	-0,37	0,88
1	54	2,00	3	3,00	4	2	2	3	2	2	2	2	2	3	3	3	58,33	66,67	75,00	50,00	0,00	4,00	2,00	1,00	-0,51	2,00	1,00	1,00	0,00	4,00	3,00	3,00	3,00	-0,64	3,00	3,00	3,00	-0,49	3,00	3,00	3,00	0,30	1,57
1	30	2,00	2	3,00	4	3	4	3	3	2	1	3	2	4	4	4	33,33	58,33	75,00	25,00	2,00	4,00	3,00	1,00	-0,01	2,00	0,00	0,00	0,00	3,00	4,00	3,00	4,00	0,39	4,00	1,00	4,00	1,03	2,00	2,00	3,00	-0,37	1,94
2	55	2,00	2	4,00	3	3	3	5	5	5	3	3	3	5	5	5	50,00	0,00	50,00	0,00	0,00	2,00	2,00	2,00	-0,74	5,00	0,00	0,00	1,00	2,00	3,00	2,00	4,00	0,27	3,00	3,00	3,00	-0,49	2,00	2,00	2,00	-0,71	0,71
2	22	1,00	5	2,00	3	3	3	3	3	3	3	3	3	3	3	3	50,00	50,00	50,00	50,00	0,00	5,00	5,00	5,00	3,36	3,00	0,00	0,00	0,00	3,00	3,00	3,00	3,00	-0,64	3,00	3,00	3,00	-0,49	3,00	3,00	3,00	0,30	0,84
1	45	2,00	4	4,00	5	5	5	3	2	2	2	2	1	3	3	2	0,00	66,67	83,33	58,33	0,00	2,00	2,00	2,00	-0,74	2,00	0,00	0,00	0,00	4,00	4,00	2,00	4,00	0,81	3,00	3,00	4,00	-0,08	4,00	4,00	4,00	1,32	0,49
1	46	3,00	5	4,00	3	2	3	3	3	3	2	3	2	2	2	3	58,33	50,00	66,67	66,67	0,00	2,00	3,00	1,00	-0,74	3,00	1,00	0,00	1,00	4,00	4,00	2,00	4,00	0,81	4,00	2,00	4,00	0,68	3,00	3,00	3,00	0,30	0,52
1	72	2,00	3	5,00	4	4	4	4	2	3	2	2	2	3	3	3	25,00	50,00	75,00	50,00	0,00	4,00	4,00	2,00	0,99	3,00	0,00	0,00	0,00	4,00	4,00	2,00	2,00	-0,17	3,00	3,00	2,00	-0,90	3,00	4,00	3,00	0,63	0,25
2	50	2,00	3	1,00	1	1	1	5	5	5	5	5	5	5	5	5	100,00	0,00	0,00	0,00	0,00	4,00	2,00	2,00	-0,01	5,00	0,00	0,00	0,00	1,00	5,00	1,00	5,00	2,26	1,00	1,00	5,00	0,20	1,00	1,00	1,00	-1,72	3,24
1	40	2,00	4	3,00	5	5	5	1	1	1	1	1	1	1	1	1	0,00	100,00	100,00	100,00	0,00	4,00	4,00	3,00	1,49	4,00	0,00	0,00	0,00	5,00	4,00	4,00	5,00	0,46	1,00	4,00	1,00	-2,49	5,00	5,00	5,00	2,33	1,34
2	67	1,00	1	4,00	4	3	3	2	2	2	2	2	3	3	3	3	41,67	75,00	66,67	50,00	1,00	1,00	2,00	2,00	-1,11	3,00	0,00	0,00	0,00	3,00	4,00	2,00	4,00	0,81	4,00	2,00	4,00	0,68	2,00	3,00	2,00	-0,38	0,55
1	59	1,00	2	4,00	5	5	5	3	3	3	1	1	1	1	1	1	0,00	50,00	100,00	100,00	3,00	2,00	2,00	2,00	-0,74	3,00	0,00	0,00	1,00	5,00	4,00	1,00	5,00	1,72	4,00	1,00	3,00	0,62	5,00	5,00	5,00	2,33	0,74
2	28	3,00	1	2,00	3	3	3	3	3	3	1	1	1	5	5	5	50,00	50,00	100,00	0,00	2,00	3,00	2,00	2,00	-0,38	2,00	0,00	0,00	0,00	2,00	3,00	3,00	3,00	-0,64	3,00	4,00	3,00	-0,84	3,00	2,00	3,00	-0,02	1,05
2	25	1,00	4	4,00	4	3	4	4	2	3	2	3	2	5	4	4	33,33	50,00	66,67	16,67	0,00	1,00	2,00	1,00	-1,61	3,00	0,00	1,00	0,00	2,00	4,00	3,00	3,00	-0,10	3,00	2,00	4,00	0,27	1,00	1,00	1,00	-1,72	0,67
2	41	3,00	1	5,00	4	3	3	4	2	2	5	4	3	5	5	5	41,67	58,33	25,00	0,00	1,00	2,00	3,00	3,00	0,26	1,00	0,00	0,00	0,00	3,00	4,00	3,00	3,00	-0,10	3,00	3,00	3,00	-0,49	2,00	2,00	4,00	-0,03	0,51
1	22	2,00	1	2,00	1	1	1	5	5	5	5	4	5	5	5	5	100,00	0,00	8,33	0,00	2,00	4,00	3,00	3,00	0,99	4,00	0,00	0,00	0,00	1,00	2,00	4,00	4,00	-1,11	1,00	4,00	1,00	-2,49	4,00	5,00	1,00	0,63	1,08
2	71	1,00	1	3,00	3	2	2	4	2	2	2	2	2	3	4	3	66,67	58,33	75,00	41,67	1,00	3,00	3,00	2,00	0,12	.	0,00	0,00	0,00	2,00	3,00	3,00	3,00	-0,64	3,00	3,00	3,00	-0,49	2,00	3,00	2,00	-0,38	1,35
2	75	2,00	4	4,00	4	4	4	3	2	1	2	2	2	2	3	3	25,00	75,00	75,00	58,33	1,00	2,00	2,00	3,00	-0,25	4,00	1,00	0,00	0,00	4,00	4,00	2,00	3,00	0,32	4,00	2,00	3,00	0,27	2,00	3,00	3,00	-0,05	0,37
1	71	1,00	1	3,00	5	1	2	5	5	3	2	2	2	5	5	4	58,33	16,67	75,00	8,33	0,00	4,00	5,00	5,00	2,99	3,00	0,00	0,00	0,00	1,00	3,00	3,00	4,00	-0,15	3,00	2,00	2,00	-0,55	2,00	3,00	2,00	-0,38	1,40
1	73	1,00	2	2,00	3	2	3	2	3	3	1	1	1	3	3	2	58,33	58,33	100,00	58,33	1,00	2,00	2,00	2,00	-0,74	5,00	0,00	0,00	0,00	4,00	4,00	3,00	4,00	0,39	3,00	4,00	4,00	-0,42	4,00	3,00	3,00	0,65	0,48
2	30	3,00	3	2,00	4	1	3	4	2	1	1	1	1	3	2	1	58,33	66,67	100,00	75,00	0,00	2,00	2,00	2,00	-0,74	3,00	0,00	0,00	0,00	1,00	4,00	3,00	4,00	0,39	3,00	3,00	1,00	-1,31	2,00	3,00	3,00	-0,05	0,62
1	62	1,00	3	3,00	4	3	3	5	2	4	1	1	3	5	3	4	41,67	33,33	83,33	25,00	0,00	3,00	2,00	2,00	-0,38	3,00	0,00	0,00	0,00	3,00	4,00	2,00	4,00	0,81	3,00	2,00	3,00	-0,14	2,00	2,00	2,00	-0,71	0,96
1	69	1,00	1	5,00	3	2	2	4	2	1	3	2	3	5	5	5	66,67	66,67	58,33	0,00	1,00	1,00	2,00	3,00	-0,61	4,00	0,00	0,00	1,00	3,00	4,00	4,00	2,00	-1,00	4,00	3,00	2,00	-0,49	1,00	1,00	1,00	-1,72	0,46
1	42	3,00	3	5,00	4	3	3	4	4	3	2	1	1	3	3	3	41,67	33,33	91,67	50,00	2,00	4,00	3,00	3,00	0,99	3,00	0,00	0,00	0,00	3,00	4,00	3,00	3,00	-0,10	3,00	3,00	3,00	-0,49	4,00	4,00	5,00	1,65	0,33
1	58	1,00	1	4,00	4	4	4	2	3	3	2	2	2	4	2	2	25,00	58,33	75,00	58,33	1,00	4,00	4,00	2,00	0,99	4,00	0,00	0,00	1,00	2,00	.	.	.	.	3,00	2,00	2,00	-0,55	2,00	4,00	3,00	0,28	0,92
2	43	3,00	1	4,00	5	5	5	3	3	2	1	1	2	2	4	3	0,00	58,33	91,67	50,00	0,00	3,00	4,00	5,00	2,12	2,00	0,00	0,00	0,00	4,00	4,00	2,00	2,00	-0,17	5,00	2,00	5,00	1,51	2,00	4,00	3,00	0,28	0,63
1	24	3,00	3	3,00	3	2	2	3	2	2	2	2	2	2	2	2	66,67	66,67	75,00	75,00	0,00	4,00	3,00	3,00	0,99	4,00	0,00	0,00	1,00	4,00	4,00	4,00	4,00	-0,02	4,00	3,00	4,00	0,34	3,00	4,00	4,00	0,97	1,58
2	24	1,00	5	2,00	4	1	1	5	4	3	2	2	2	5	5	5	75,00	25,00	75,00	0,00	1,00	5,00	4,00	1,00	0,86	2,00	0,00	0,00	0,00	1,00	4,00	1,00	2,00	0,25	4,00	1,00	4,00	1,03	1,00	1,00	1,00	-1,72	0,84
2	44	3,00	1	5,00	3	3	2	2	3	3	3	3	3	3	3	3	58,33	58,33	50,00	50,00	0,00	1,00	1,00	1,00	-2,11	.	0,00	0,00	0,00	4,00	4,00	4,00	4,00	-0,02	4,00	4,00	4,00	-0,01	4,00	4,00	4,00	1,32	0,51
1	25	1,00	4	4,00	3	2	3	2	2	3	2	2	3	3	2	2	58,33	66,67	66,67	66,67	0,00	4,00	4,00	5,00	2,49	4,00	1,00	0,00	0,00	4,00	4,00	4,00	3,00	-0,51	3,00	3,00	4,00	-0,08	4,00	5,00	4,00	1,64	0,69
1	69	1,00	1	4,00	5	5	5	2	2	2	1	1	1	4	4	4	0,00	75,00	100,00	25,00	0,00	3,00	3,00	2,00	0,12	4,00	0,00	0,00	0,00	1,00	2,00	4,00	2,00	-2,08	4,00	3,00	4,00	0,34	2,00	3,00	2,00	-0,38	0,57
2	31	3,00	3	3,00	3	3	3	3	3	3	3	3	3	3	3	3	50,00	50,00	50,00	50,00	0,00	3,00	3,00	3,00	0,62	3,00	0,00	0,00	0,00	3,00	3,00	3,00	3,00	-0,64	3,00	3,00	3,00	-0,49	3,00	3,00	3,00	0,30	1,45
1	45	3,00	2	5,00	3	3	3	3	3	3	3	3	2	3	4	3	50,00	50,00	58,33	41,67	0,00	4,00	1,00	1,00	-1,01	3,00	1,00	0,00	0,00	4,00	.	.	.	.	2,00	4,00	3,00	-1,25	3,00	3,00	3,00	0,30	0,42
2	32	2,00	1	3,00	3	2	2	5	3	2	4	4	4	4	4	4	66,67	41,67	25,00	25,00	0,00	2,00	2,00	2,00	-0,74	4,00	0,00	0,00	1,00	2,00	4,00	3,00	3,00	-0,10	5,00	2,00	4,00	1,10	2,00	3,00	2,00	-0,38	2,34
2	58	1,00	2	3,00	3	3	3	5	4	4	1	1	1	4	5	4	50,00	16,67	100,00	16,67	0,00	2,00	1,00	2,00	-1,25	5,00	0,00	0,00	0,00	3,00	5,00	1,00	5,00	2,26	1,00	1,00	5,00	0,20	1,00	1,00	1,00	-1,72	1,96
2	73	2,00	1	4,00	5	3	4	1	2	1	1	1	2	2	2	2	25,00	91,67	91,67	75,00	0,00	2,00	1,00	2,00	-1,25	2,00	0,00	0,00	0,00	4,00	4,00	2,00	4,00	0,81	2,00	4,00	2,00	-1,66	4,00	4,00	4,00	1,32	0,49
2	61	1,00	3	4,00	5	5	5	5	2	1	1	1	1	3	2	2	0,00	58,33	100,00	66,67	0,00	4,00	3,00	3,00	0,99	2,00	0,00	0,00	0,00	5,00	4,00	2,00	4,00	0,81	1,00	5,00	1,00	-2,83	3,00	5,00	1,00	0,28	0,34
2	42	3,00	3	3,00	4	3	3	3	2	2	2	2	2	4	3	3	41,67	66,67	75,00	41,67	0,00	4,00	4,00	2,00	0,99	3,00	0,00	1,00	1,00	5,00	4,00	2,00	4,00	0,81	3,00	3,00	3,00	-0,49	4,00	3,00	3,00	0,65	1,07
2	59	1,00	3	1,00	2	1	1	5	5	5	3	4	4	5	5	5	91,67	0,00	33,33	0,00	0,00	1,00	3,00	3,00	-0,11	3,00	0,00	1,00	1,00	1,00	3,00	4,00	1,00	-2,03	5,00	1,00	5,00	1,85	1,00	1,00	1,00	-1,72	3,24
2	51	1,00	3	3,00	5	3	3	5	5	5	3	2	3	5	3	3	33,33	0,00	58,33	33,33	0,00	2,00	2,00	2,00	-0,74	4,00	0,00	0,00	0,00	3,00	3,00	3,00	3,00	-0,64	4,00	2,00	3,00	0,27	2,00	2,00	2,00	-0,71	1,52
1	34	1,00	1	4,00	5	5	5	2	1	1	1	1	1	1	1	1	0,00	91,67	100,00	100,00	2,00	2,00	2,00	3,00	-0,25	1,00	0,00	1,00	0,00	4,00	3,00	3,00	3,00	-0,64	3,00	3,00	3,00	-0,49	4,00	3,00	4,00	0,99	0,88
1	27	3,00	1	4,00	1	1	2	2	1	1	2	2	2	1	1	2	91,67	91,67	75,00	91,67	0,00	5,00	5,00	5,00	3,36	.	0,00	0,00	0,00	5,00	5,00	5,00	5,00	0,59	5,00	5,00	5,00	0,47	5,00	5,00	4,00	1,99	0,93
2	62	2,00	3	4,00	3	1	1	5	5	5	1	1	2	5	5	5	83,33	0,00	91,67	0,00	0,00	2,00	2,00	2,00	-0,74	5,00	0,00	0,00	1,00	4,00	5,00	2,00	4,00	1,35	5,00	2,00	4,00	1,10	1,00	1,00	1,00	-1,72	0,34
1	73	1,00	4	3,00	4	3	3	3	2	2	2	2	2	3	2	2	41,67	66,67	75,00	66,67	1,00	3,00	4,00	2,00	0,62	3,00	0,00	0,00	0,00	4,00	3,00	3,00	3,00	-0,64	3,00	3,00	3,00	-0,49	3,00	4,00	3,00	0,63	1,05
1	73	1,00	4	1,00	5	1	4	3	3	2	1	1	1	3	2	3	41,67	58,33	100,00	58,33	1,00	4,00	3,00	2,00	0,49	3,00	0,00	0,00	0,00	4,00	4,00	3,00	4,00	0,39	4,00	4,00	4,00	-0,01	3,00	4,00	2,00	0,29	2,24
1	47	3,00	1	5,00	4	5	5	2	2	2	1	1	1	2	2	2	8,33	75,00	100,00	75,00	0,00	3,00	3,00	3,00	0,62	1,00	0,00	0,00	1,00	4,00	4,00	3,00	3,00	-0,10	3,00	3,00	3,00	-0,49	4,00	4,00	4,00	1,32	0,53
1	27	3,00	3	4,00	4	3	3	3	3	3	2	2	2	3	3	3	41,67	50,00	75,00	50,00	0,00	2,00	3,00	1,00	-0,74	4,00	0,00	0,00	1,00	2,00	3,00	3,00	3,00	-0,64	3,00	2,00	4,00	0,27	1,00	2,00	3,00	-0,72	0,57
1	55	2,00	1	4,00	5	4	5	3	1	2	1	1	1	4	5	4	8,33	75,00	100,00	16,67	0,00	5,00	5,00	5,00	3,36	3,00	0,00	0,00	0,00	2,00	4,00	3,00	3,00	-0,10	4,00	2,00	4,00	0,68	1,00	2,00	2,00	-1,06	0,92
1	29	1,00	3	3,00	2	2	3	3	3	2	2	3	3	3	3	3	66,67	58,33	58,33	50,00	1,00	4,00	4,00	4,00	1,99	3,00	1,00	0,00	0,00	4,00	.	.	.	.	.	.	.	.	5,00	4,00	4,00	1,66	1,58
2	49	3,00	1	4,00	4	2	2	5	5	4	4	1	1	4	4	3	58,33	8,33	75,00	33,33	0,00	1,00	1,00	2,00	-1,61	5,00	1,00	0,00	1,00	2,00	3,00	2,00	3,00	-0,22	4,00	1,00	4,00	1,03	2,00	2,00	2,00	-0,71	0,63
2	63	2,00	1	4,00	4	2	2	4	4	2	1	2	2	2	3	3	58,33	41,67	83,33	58,33	0,00	1,00	1,00	1,00	-2,11	3,00	0,00	0,00	0,00	3,00	3,00	3,00	2,00	-1,12	4,00	3,00	4,00	0,34	2,00	3,00	2,00	-0,38	0,55
2	32	2,00	1	5,00	5	3	4	4	3	3	3	1	1	4	4	4	25,00	41,67	83,33	25,00	0,00	3,00	3,00	2,00	0,12	5,00	0,00	0,00	0,00	1,00	5,00	1,00	5,00	2,26	5,00	1,00	5,00	1,85	1,00	1,00	3,00	-1,05	0,69
1	28	3,00	2	4,00	2	1	1	1	1	1	1	1	2	2	1	2	91,67	100,00	91,67	83,33	0,00	5,00	5,00	5,00	3,36	.	0,00	0,00	0,00	5,00	5,00	5,00	5,00	0,59	5,00	5,00	5,00	0,47	5,00	5,00	4,00	1,99	0,74
1	28	1,00	1	4,00	3	3	3	2	2	2	3	3	3	2	2	2	50,00	75,00	50,00	75,00	0,00	3,00	4,00	4,00	1,62	4,00	0,00	0,00	0,00	4,00	4,00	4,00	4,00	-0,02	5,00	1,00	5,00	1,85	4,00	4,00	4,00	1,32	0,93
1	47	2,00	3	2,00	3	3	3	3	3	3	3	3	3	3	3	3	50,00	50,00	50,00	50,00	1,00	2,00	2,00	2,00	-0,74	3,00	0,00	0,00	0,00	3,00	.	.	.	.	.	.	.	.	3,00	3,00	3,00	0,30	0,47
2	23	2,00	1	3,00	3	3	3	5	4	4	2	2	2	5	4	4	50,00	16,67	75,00	16,67	1,00	1,00	2,00	1,00	-1,61	5,00	1,00	1,00	0,00	2,00	3,00	3,00	3,00	-0,64	5,00	2,00	5,00	1,51	2,00	2,00	4,00	-0,03	2,46
1	48	3,00	1	3,00	3	3	3	3	3	3	3	3	3	3	3	3	50,00	50,00	50,00	50,00	0,00	4,00	4,00	4,00	1,99	1,00	0,00	0,00	0,00	3,00	.	.	.	.	.	.	.	.	3,00	3,00	3,00	0,30	1,79
1	22	2,00	4	2,00	3	3	3	4	4	3	3	3	2	4	4	4	50,00	33,33	58,33	25,00	1,00	3,00	3,00	2,00	0,12	2,00	0,00	0,00	1,00	4,00	3,00	3,00	3,00	-0,64	3,00	3,00	3,00	-0,49	2,00	3,00	2,00	-0,38	0,81
1	22	2,00	4	4,00	5	4	5	3	2	2	1	1	1	2	2	2	8,33	66,67	100,00	75,00	0,00	1,00	1,00	1,00	-2,11	3,00	1,00	0,00	0,00	4,00	3,00	2,00	4,00	0,27	1,00	4,00	1,00	-2,49	3,00	4,00	4,00	0,97	0,69
2	64	2,00	3	4,00	3	2	2	5	5	3	3	3	2	5	5	4	66,67	16,67	58,33	8,33	1,00	3,00	3,00	3,00	0,62	3,00	0,00	0,00	1,00	2,00	5,00	2,00	5,00	1,84	5,00	1,00	4,00	1,44	1,00	1,00	1,00	-1,72	0,34
1	67	1,00	5	3,00	4	4	4	4	2	3	2	2	2	4	4	4	25,00	50,00	75,00	25,00	0,00	1,00	3,00	2,00	-0,61	4,00	0,00	0,00	0,00	2,00	4,00	2,00	4,00	0,81	4,00	2,00	4,00	0,68	2,00	2,00	4,00	-0,03	1,25
1	32	3,00	1	2,00	5	4	5	5	3	2	2	2	2	4	2	4	8,33	41,67	75,00	41,67	2,00	4,00	4,00	4,00	1,99	3,00	0,00	0,00	0,00	2,00	4,00	2,00	4,00	0,81	5,00	1,00	4,00	1,44	1,00	4,00	4,00	0,27	1,03
1	71	1,00	1	4,00	4	3	3	2	2	2	2	2	2	2	3	2	41,67	75,00	75,00	66,67	1,00	3,00	2,00	2,00	-0,38	3,00	0,00	0,00	0,00	4,00	3,00	3,00	3,00	-0,64	3,00	3,00	3,00	-0,49	2,00	2,00	2,00	-0,71	0,51
1	68	2,00	3	3,00	4	4	4	3	3	3	2	2	2	3	3	3	25,00	50,00	75,00	50,00	0,00	4,00	2,00	2,00	-0,01	3,00	0,00	0,00	0,00	3,00	3,00	2,00	5,00	0,76	1,00	5,00	1,00	-2,83	3,00	3,00	3,00	0,30	0,96
1	64	1,00	1	5,00	5	5	5	4	2	1	1	1	1	3	3	2	0,00	66,67	100,00	58,33	0,00	3,00	3,00	3,00	0,62	3,00	0,00	0,00	0,00	4,00	4,00	2,00	4,00	0,81	2,00	4,00	2,00	-1,66	4,00	4,00	3,00	0,98	0,46
2	22	2,00	3	2,00	1	1	1	5	5	4	4	4	4	5	4	4	100,00	8,33	25,00	16,67	1,00	3,00	2,00	3,00	0,12	3,00	0,00	0,00	1,00	2,00	4,00	2,00	3,00	0,32	5,00	2,00	4,00	1,10	1,00	1,00	1,00	-1,72	0,65
1	49	2,00	1	2,00	5	3	5	3	2	3	3	1	1	3	3	3	16,67	58,33	83,33	50,00	0,00	1,00	3,00	2,00	-0,61	3,00	0,00	0,00	0,00	4,00	4,00	2,00	4,00	0,81	3,00	3,00	2,00	-0,90	4,00	5,00	4,00	1,64	0,76
2	61	2,00	1	4,00	4	4	4	3	2	2	2	2	1	1	2	1	25,00	66,67	83,33	91,67	0,00	2,00	2,00	2,00	-0,74	2,00	0,00	0,00	0,00	4,00	4,00	3,00	3,00	-0,10	2,00	3,00	2,00	-1,31	4,00	5,00	2,00	0,97	0,55
2	58	1,00	3	3,00	3	3	3	4	3	3	3	3	3	5	5	3	50,00	41,67	50,00	16,67	0,00	2,00	1,00	2,00	-1,25	2,00	0,00	1,00	1,00	4,00	3,00	3,00	3,00	-0,64	3,00	3,00	2,00	-0,90	3,00	3,00	3,00	0,30	1,52
2	30	1,00	3	5,00	5	4	5	4	4	4	1	1	1	4	4	3	8,33	25,00	100,00	33,33	2,00	2,00	3,00	2,00	-0,24	2,00	0,00	0,00	0,00	5,00	4,00	1,00	5,00	1,72	2,00	2,00	2,00	-0,97	4,00	4,00	4,00	1,32	0,43
2	60	1,00	3	3,00	5	3	4	4	2	3	2	2	2	2	3	3	25,00	50,00	75,00	58,33	1,00	5,00	1,00	1,00	-0,65	2,00	0,00	0,00	0,00	4,00	3,00	3,00	3,00	-0,64	3,00	2,00	4,00	0,27	4,00	4,00	2,00	0,64	0,93
2	55	2,00	1	3,00	2	1	1	5	5	5	4	4	4	5	5	5	91,67	0,00	25,00	0,00	0,00	2,00	2,00	2,00	-0,74	3,00	0,00	1,00	0,00	1,00	4,00	2,00	4,00	0,81	4,00	2,00	4,00	0,68	1,00	1,00	1,00	-1,72	2,45
1	34	1,00	1	4,00	1	1	1	1	1	1	1	1	1	1	1	1	100,00	100,00	100,00	100,00	2,00	3,00	2,00	3,00	0,12	1,00	0,00	1,00	0,00	5,00	.	.	.	.	.	.	.	.	5,00	5,00	5,00	2,33	0,88
2	63	1,00	1	4,00	4	2	2	3	3	2	2	1	1	5	5	5	58,33	58,33	91,67	0,00	1,00	2,00	2,00	2,00	-0,74	5,00	0,00	0,00	1,00	1,00	2,00	5,00	3,00	-2,01	5,00	1,00	5,00	1,85	1,00	1,00	1,00	-1,72	0,55
