# Supplementary material for: A multidimensional measure of animal ethics orientation – Developed and applied to a representative sample of the Danish public
Source: PLoS One. 2019 Feb 7;14(2):e0211656. doi: 10.1371/journal.pone.0211656 (PMC6366885; doi:10.1371/journal.pone.0211656)
Supplement: S12 Table — (DOCX) [file pone.0211656.s012.docx]

|  | | | | | | | | | | | | |
| --- | --- | --- | --- | --- | --- | --- | --- | --- | --- | --- | --- | --- |
| *Animal Protection Items* | | | | | | | | | | | | |
|  | ITEM REMOVED | | | Using animals for important human purposes (e.g. medical research) is acceptable if it is done so that the animals do not experience unnecessary stress. | | | Using animals for important human purposes is acceptable if it is done so that the animals do not experience unnecessary pain. | | | Using animals for important human purposes is acceptable if the animals have a decent quality of life. | | |
| Test statistics |  |  |  | Uniform DIF | Total DIF | Non-uniform DIF | Uniform DIF | Total DIF | Non-uniform DIF | Uniform DIF | Total DIF | Non-uniform DIF |
| ∆ Chi2 |  |  |  | 0,32 | 0,36 | 0,05 | 0,01 | 3,00 | 2,99 | 1,95 | 3,42 | 1,47 |
| p-value |  |  |  | n.s. | n.s. | n.s. | n.s. | n.s. | n.s. | n.s. | n.s. | n.s. |
| ∆ R2 |  |  |  | 0,001 | 0,001 | 0,000 | 0,000 | 0,004 | 0,004 | 0,000 | 0,004 | 0,004 |
